# Supplementary material
Source: PubMed Central journal article supplement (PMC8930069)
Supplement: cvab111_supplementary_data.pdf [file cvab111_supplementary_data.pdf]

# Free fatty acid receptor 4 responds to endogenous fatty acids to protect the heart from pressure overload

## On-Line Supplement

Katherine A. Murphy, PhD<sup>1</sup>, Brian A. Harsch, MS<sup>2</sup>, Chastity L. Healy, BS<sup>1</sup>, Sonal S. Joshi, PhD<sup>1</sup>, Shue Huang, PhD<sup>2</sup>, Rachel E. Walker, PhD<sup>2</sup>, Brandon M. Wagner, BA<sup>1</sup>, Katherine M. Ernste, BA<sup>1</sup>, Wei Huang, MS<sup>3</sup>, Robert C. Block, MD, MPH<sup>4</sup>, Casey D. Wright, PhD<sup>5</sup>, Nathan Tintle, PhD<sup>6</sup>, Brian C. Jensen, MD<sup>3</sup>, Quinn S. Wells, MD, PharmD<sup>7</sup>, Gregory C. Shearer, PhD<sup>2,\*</sup>, and Timothy D. O'Connell, PhD<sup>1,\*</sup>.

<sup>1</sup>Department of Integrative Biology and Physiology, University of Minnesota, Minneapolis, MN

<sup>2</sup>Department of Nutritional Sciences, The Pennsylvania State University, University Park, PA

<sup>3</sup>Division of Cardiology and McAllister Heart Institute, University of North Carolina, Chapel Hill, NC

<sup>4</sup>Department of Public Health Sciences, University of Rochester, NY

<sup>5</sup>Inanovate Inc., Sioux Falls, SD

<sup>6</sup>Department of Statistics, Dordt University, Sioux Center, IA

<sup>7</sup>Division of Cardiovascular Medicine, Vanderbilt University Medical Center, Nashville, TN

\*Correspondence to:

Timothy D. O'Connell, PhD  
Department of Integrative Biology and Physiology  
University of Minnesota School of Medicine  
3-141 CCRB  
2231 6th Street SE  
Minneapolis, MN 55414  
Email: [tdoconne@umn.edu](mailto:tdoconne@umn.edu)

-and-

Gregory C Shearer, PhD  
Department of Nutritional Sciences  
110 Chandlee Laboratory  
University Park, PA 16802  
[gcs13@psu.edu](mailto:gcs13@psu.edu)

## Methods

### Mice

For this study, all experimental mice were placed on a control diet (described below) at 8 weeks of age. At 12 weeks, male and female, WT and Ffar4KO mice were randomized and enrolled into the study. For all experimental analyses, data collection was done with investigator blinded to genotype and treatment.

Ffar4KO mice were generated from cryopreserved sperm from C57Bl/6N-*Ffar4*<sup>tm1(KOMP)lcr</sup> (Design ID: 15078; Project ID: VG15078) purchased from The KOMP Repository, UC-Davis (Davis, CA, USA). Cryo-recovery of the mouse line was performed at the UMN Mouse Genetics Laboratory through *in vitro* fertilization (IVF) using C57Bl/6J female recipients (#000664; The Jackson Laboratory, Bar Harbor ME, USA). The line was maintained by hemizygous breeding to C57Bl/6J for backcrossing. Homozygous mice were crossed to produce wild type and knock out offspring. Genotype was determined by PCR using the primer design provided by KOMP Repository:

|                        |                                        |
|------------------------|----------------------------------------|
| Cassette Primers:      | Reg-NeoF: GCAGCCTCTGTTCCACATACACTTCA   |
|                        | Reg-LacF: ACTTGCTTTAAAAACCTCCCACA      |
| Gene Specific Primers: | Reg-Ffar4-wtR: TGGAAGCCCTCCTCTGTGTTCCG |
|                        | Reg-Ffar4-wtF: TTACAGCCAGGTGGGACACAGG  |

### Diet

Since fatty acids are known agonists of Ffar4, we sought to control the fatty acid profile of the diet by feeding mice a custom chow from Dyets, Inc (#180539; Bethlehem, PA, USA) beginning at 8 weeks of age. This chow is a modified version of the AIN-93M purified rodent diet used in our previous studies, with corn oil replacing soybean oil (diet composition is listed in Supplemental Table 1).<sup>1,2</sup>

### Transverse Aortic Constriction (TAC)

Transverse aortic constriction (TAC) surgery was performed as previously described.<sup>1-5</sup> Baseline measurements of cardiac function by echocardiography were collected prior to surgery. For surgery, mice were anesthetized with 3% isoflurane and maintained at 1.5% isoflurane without intubation. A small incision was made slightly left of the midline and above the left clavicle without entering the pleural cavity. The muscle tissue and lobes of the thymus were retracted to expose the aortic arch. A 7-0 surgical suture was threaded under the aortic arch and tied-off against a small piece of a blunt 28-gauge needle followed by immediate removal of

the needle. To close the original incision, the muscle layer and skin were secured separately with 4-0 continuous sutures. Buprenorphine (0.1 mg/kg IP) was administered for pain management during the first 24 hours post-surgery and as needed thereafter. Sham surgery was identical except for ligation of the aorta. Pulsed-wave Doppler by echocardiography was used to confirm pressure gradients by evaluating aortic flow velocity (AoV, Supplemental Tables 3B and 4B) 7-days post-surgery at the site of constriction. Exclusion criteria were established prior to the study and based on surgical success. Mice were excluded from the study if they did not obtain a significant pressure gradient post-TAC, based on Pulsed-wave Doppler by echocardiographic flow measurements at the constriction, which was considered a failed surgery due to inability to ligate the aorta, or mice were excluded if they failed to thrive following surgery and lost significant weight, which was considered as a failed surgery due to injury at surgery. Using these criteria, three WT and three Ffar4KO mice were excluded from the study.

### **Cardiac function**

Echocardiography was performed before TAC (baseline), 7-days post-TAC to measure aortic velocity (AoV) to validate the TAC surgery, and 4 weeks post-TAC using the Vevo 2100 (FujiFilm VisualSonics Inc. Toronto, ON, Canada) with a MS550 transducer. For all measurements, mice were anesthetized with isoflurane, gently restrained in the supine position on the prewarmed monitoring pad, and echocardiographic images were captured as mice were recovering from anesthesia to achieve a target heart rate (HR) of 450 – 500 bpm. Parasternal long axis M-mode images of the left ventricle were captured to measure left ventricular wall thicknesses (LVPWs: systolic left ventricular posterior wall; LVPWd: diastolic left ventricular posterior wall), left ventricular internal diameters (LVIDs: systolic left ventricular internal diameter; LVIDd: diastolic left ventricular internal diameter), left ventricular volumes (ESV: end systolic volume,  $(7.0/(2.4 + LVIDs)) * LVIDs^3$ ; EDV: end diastolic volume,  $(7.0/(2.4 + LVIDd)) * LVIDd^3$ ), fractional shortening (FS:  $100 * ((LVIDd - LVIDs)/LVIDd)$ ), ejection fraction (EF:  $100 * ((EDV - ESV)/EDV)$ ), stroke volume (SV:  $EDV - ESV$ ), and cardiac output (CO:  $SV * HR$ ). Pulsed-wave Doppler images of the aortic arch were recorded at the site of constriction to measure peak aortic velocity (AoV) and pressure gradient (PG:  $(4 * AoV^2)/1000$ ). Pulsed-wave Doppler images of the apical four-chamber view were taken to measure mitral flow velocities (E wave and A wave to calculate E/A ratio) as well as mitral annulus tissue velocity (E/E': peak early transmitral flow velocity/peak early diastolic mitral annular velocity).

### **Erythrocyte FA composition**

At the study endpoint, blood from the posterior vena cava was collected into EDTA tubes. Red blood cell fractions were separated and analyzed for fatty acid composition as previously described.<sup>1,2</sup> Briefly, 50  $\mu$ L of isolated erythrocytes were methylated with 14% boron trifluoride in methanol by incubation for 10 minutes at 100°C. Fatty acid methyl esters were extracted in hexane and analyzed by a GC-2010 gas chromatography system fitted with a QP2010 mass spectrometer (Shimadzu, Japan) using a Supelco SP-2560 fused silica column (Supelco, Bellefonte, PA). Area counts were obtained using Shimadzu GCMSolution software with multiple ion counts of characteristic fatty acids ions. Each fatty acid was quantified as mass percent of total fatty acids. In general, only minor differences in red blood cell fatty acid composition were detected between WT and Ffar4KO following TAC (Supplemental Table 2A and 2B).

### **Tissue histology**

Four weeks after TAC surgery, hearts were arrested in diastole with 60mM KCl, excised, and weighed. Extracted hearts were cannulated and perfused with PBS with 60mM KCl, followed by 4% paraformaldehyde. The atria were removed from the fixed hearts prior to embedding in paraffin. Sectioning was performed by AML Laboratories (Jacksonville, FL) providing a transverse view of the ventricles. Lungs were also collected and lung weights were recorded.

Paraffin embedded ventricular sections were deparaffinized with xylene and rehydrated in ethanol. Sections were stained in 0.1% solution of Sirius red (direct red 80, Sigma-Aldrich, St Louis, MO) and fast green (Sigma-Aldrich) in 1.2% picric acid (Ricca Chemical Company, Arlington, TX), followed by dehydration in ethanol and xylene. Sections were imaged at 4x magnification. Ventricular fibrosis (as percent of total ventricular area) was quantified using Fiji software (NIH).<sup>1,2</sup> Ventricular fibrosis was quantified using images captured at 4X magnification and included both the right and left ventricle. The threshold settings were adjusted to highlight and calculate the total tissue area or picrosirius red positively stained area.

### **Isolation and culture of adult cardiac myocytes**

We previously described procedures for the isolation and culture of adult mouse cardiac myocytes.<sup>6</sup> Here, myocytes were isolated 3-days post-TAC from male WT and Ffar4KO, sham and TAC operated mice for analysis of myocyte transcriptomes, or were cultured from WT and Ffar4KO hearts for analysis of Ffar4 signaling. Briefly, mice were anesthetized with isoflurane

(3% for induction, 1.5% for maintenance), injected with heparin (100 IU/mL), the pleural cavity was opened and the heart removed, cannulated on a retrograde perfusion apparatus, and perfused with collagenase type II (Worthington Biochemical Corp, Lakewood, NJ) to dissociate ventricular myocytes. Isolated cardiac myocytes were plated at a density of 50 rod-shaped myocytes per square millimeter on laminin-coated culture dishes. Myocytes were cultured in MEM with Hank's Balanced Salt Solution, 1 mg/ml bovine serum albumin, 10 mM 2,3-butanedione monoxime, and 100 U/ml Penicillin in a 4.5% CO<sub>2</sub> incubator (%CO<sub>2</sub> determined empirically to maintain culture medium at pH 7.0) at 37°C. All reagents were purchased from Millipore Sigma (Burlington, MA, USA) unless otherwise specified. Full details of the buffers, enzymes, cell culture medium, all procedures for isolation and culturing of adult mouse ventricular myocytes (AMVM) and a detailed diagram of the perfusion apparatus were described in detail previously.<sup>6</sup> Based on our previous experience, myocyte isolation are ~95% pure, but we cannot exclude the possibility of minimal contamination with fibroblasts and endothelial cells.<sup>6</sup> Following plating, myocytes were counted at a magnification of 20X to determine cell viability, and myocytes were incubated in a 4.5% CO<sub>2</sub> incubator at 37°C overnight. For analysis of Ffar4 signaling, cardiac myocytes were treated with the Ffar4 agonist TUG-891(Cayman Chemical, MI, USA) (50 μM) for 0-60 minutes.

### **RNA-seq:**

Three days after surgery, cardiac myocytes were isolated from WT sham (n=4), WT TAC (n=5), Ffar4KO sham (n=4) and Ffar4KO TAC (n=8) male mice. RNA was isolated using RNeasy Fibrous Tissue Mini Kit (Qiagen). Dual-indexed Clontech Pico Mammalian stranded RNA libraries were made. 125bp paired end sequencing was performed using the HiSeq 2500 sequencer (Illumina) by the University of Minnesota Genomics Center.

Data was analyzed by the University of Minnesota Informatics Institute. 2 X 125bp FastQ paired end reads (n=8.4 Million average per sample) were trimmed using Trimmomatic (v 0.33) enabled with the optional "-q" option; 3bp sliding-window trimming from 3' end requiring minimum Q30. Quality control on raw sequence data for each sample was performed with FastQC. Read mapping was performed via Hisat2 (v2.1.0) using the mouse genome (mm10) as reference. Gene quantification was done via Cuffquant for FPKM values and Feature Counts for raw read counts. Differentially expressed genes were identified using the edgeR (negative binomial) feature in CLC Genomics WorkBench (CLCGWB) (Qiagen, Redwood City, CA) using raw read counts. We filtered the generated list based on a minimum 1.7X Absolute Fold Change and FDR corrected p < 0.05. Two lists were generated of differentially expressed genes from 1.)

WT sham compared to WT TAC animals (2789 genes) and 2.) Ffar4KO sham compared to Ffar4KO TAC animals (1656 genes). The lists were compared to each other to identify genes that overlapped between the two lists to identify common genes (1409) and those genes that were unique to the WT mice (1380 genes) and Ffar4KO mice (247 genes). The genes were further annotated in CLCGW based on Gene Ontology (GO) terms for biological function from MGI. Genes were further sorted based on the indicated GO Terms into nine categories.

Principal component analyses used CPMs that were filtered based on gene size (excluding genes less than 200bp) and variance less than 1 in raw read counts. The actual cpm values are log<sub>2</sub> transformed and plotted using the PCA function in R.

### **TUG-891 effects on cardiac gene expression**

To assess the effects of Ffar4 on cardiac gene expression, 12-week-old male WT mice were injected IP with either TUG-891 (35 mg/kg) or DMSO vehicle once daily for three days. Twenty-four hours after the third injection, hearts were harvested, RNA was isolated using the RNeasy Fibrous Tissues Mini Kit (Qiagen). RNA was reverse transcribed with qScript cDNA SuperMix (Quantabio), and qRT-PCR was performed with Bio-Rad's iTaq Universal SYBR Green SuperMix and CFX96 Real-Time System.

Primer sequences used:

arg1 forward: CTCCAAGCCAAAGTCCTTAGAG  
arg1 reverse: AGGAGCTGTCATTAGGGACATC

hmox1 forward: AAGCCGAGAATGCTGAGTTCA  
hmox1 reverse: GCCGTGTAGATATGGTACAAGGA

ptgs2 forward: TGAGCAACTATTCAAACCAGC  
ptgs2 reverse: GCACGTAGTCTTCGATCACTATC

pik3r5 forward: TGCTCTGGAGCGATGCTTG  
pik3r5 reverse: ACCTCTGGGTCTTTTGTAGGA

cxcl5 fwd: TGC GTTGTGTTTGCTTAACCG  
cxcl5 rvs: CTTCCACCGTAGGGCACTG

pak3 fwd: CTGAGGATGAACAGTAACAACCG  
pak3 rvs: CTGGGAAGATAGAGCGAAGCC

il1rn fwd: GTCATTGCTGGGTACTTACAA  
il1rn rvs: CCAGACTTGGCACAAGACAGG

timp1 fwd: CGAGACCACCTTATACCAGCG  
timp1 rvs: ATGACTGGGGTGTAGGCGTA

## Oxylipins

Plasma lipoproteins were separated by FPLC followed by measurement of esterified oxylipin (HDL, LDL, and VLDL) or unesterified (albumin). 150  $\mu$ L of mouse EDTA plasma was thawed and filtered by centrifugation at 10,000 g for 5 min using Ultrafree Durapore PVDF filter (pore-size 0.2  $\mu$ m; Millipore, Bedford, MA). The filtrate was then injected onto an AKTA Purifier FPLC (Amersham Biosciences, Sweden) and run at a flow rate of 0.5 mL/min in 1mM EDTA, 0.9% NaCl saline solution, pH 7.4 using an additional 100  $\mu$ L of phosphate buffer solution to fill injection loop. Elutions were monitored at a UV absorbance of 280 nm and lipoproteins were separated using a Superose-6 10/300 GL size exclusion column. Fractions were collected every 0.5 min using a Foxy 200 fraction collector and were pooled for each lipoprotein fraction and stored at -80 °C. VLDL, LDL, HDL, and albumin fractions (100  $\mu$ L) were spiked with BHT/EDTA (0.2 mg/mL), four deuterated octadecanoid and eicosanoid surrogates (20  $\mu$ L of 1000 nM concentration with final concentration of 50 nM after reconstitution) and subjected to liquid-liquid extraction to isolate lipid content. Samples were then hydrolyzed in 0.1 M methanolic sodium hydroxide to release ester-linked oxylipins and subjected to solid phase extraction using Chromabond HLB sorbent columns (Machery Nagel, Duren, Germany). Oxylipins were eluted with 0.5 mL of methanol with 0.1% acetic acid and 1 mL of ethyl acetate and dried under nitrogen stream and reconstituted in 200  $\mu$ L methanol acetonitrile (1:1) with 100 nM of 1-cyclohexyluriedo-3-dodecanoic acid used as internal standard.

Samples were analyzed by liquid chromatography using a Waters Acquity UPLC coupled to Waters Xevo triple quadrupole mass spectrometer equipped with electrospray ionization source (Waters, Milford, MA). 5  $\mu$ L of the extract was injected and separation was performed using a CORTECS UPLC C18 2.1 x 100 mm with 1.6  $\mu$ m particle size column. Flow rate was set at 500  $\mu$ L/min and consisted of a gradient run using water with 0.1% acetic acid (Solvent A) and acetonitrile isopropanol, 90:10 (Solvent B) for 15 minutes (0-12 min from 25% B to 95% B, 12-12.5 min 95% B, 12.5-15 min 25% B). Electrospray ionization operated in negative ion mode with capillary set at 2.7 kV, desolvation temperature set at 600 °C, and source temp set to 150°C. Optimal oxylipin MRM transitions were identified by direct injection of pure standards onto the mass spectrometer and using cone voltage and collision energy ramps to optimize detection and most prevalent daughter fragments. Calibration curves were generated prior to each run using standards for each oxylipin. Peak detection and integrations were achieved through Target Lynx (Waters, Milford, MA) and each peak inspected for accuracy and corrected when needed.

### Cardiac myocyte cell death

Cardiac myocyte death was measured as described previously.<sup>7</sup> Cardiac myocytes were cultured overnight and treated with TUG-891 (10  $\mu$ M) (Cayman Chemical, Ann Arbor, MI) or 18-HEPE (100 nM) (Cayman Chemical) as indicated. Cell death was induced with H<sub>2</sub>O<sub>2</sub> (10 mM) (Sigma Aldrich, St. Louis, MO), as we described previously.<sup>7</sup> For each condition, at least 150 myocytes were counted in 5 randomly selected fields. Based on our prior studies, cell death was measured by comparing rod versus round morphology, as we have found that this replicates other measures of cell death, including annexin V/PI staining and staining with the mitochondrial membrane permeability stain JC-1.<sup>4, 7-9</sup>

### RT-PCR for Ffar4 and Ffar1 expression in heart

Ventricular myocardium was obtained from non-failing and failing human hearts through the Duke Human Heart Repository (DHHR) as previously described.<sup>10</sup> Briefly, failing human myocardium was acquired from the left ventricular free wall of explanted hearts following cardiac transplantation. Non-failing left ventricular tissue was acquired from donors whose hearts were not utilized for transplant with permission from Carolina Donor Services. No HIPAA information was provided with any of the samples used in this study. Approximately 20-40 mg of human ventricular myocardium was homogenized in 1 mL of Trizol (Life Technologies #15596-026, Carlsbad, CA) with a TissueLyser LT (Qiagen N.V. #69980, Venlo, The Netherlands). The lysate centrifuged at 12,000g (15 min at 4°C) after the addition of chloroform (200  $\mu$ L). Isopropanol (0.5 mL) was then added to the aqueous phase, centrifuged at 12,000 g (10 min at 4°C). The resulting RNA pellet was washed with 1 mL of 75% ethanol, then centrifuged at 7500 g (5 min at 4°C) and resuspended in RNase-free water.

Primers used to detect human Ffar4:

hFfar4: gctcatctggggctattcg

hFfar4: gcssstcgaaatttctctggt

(The above primers detected Ffar4S (NM\_001195755.1) and Ffar4L (NM\_181745.3).)

hFfar4 aagagctgtcgtgactcacagt (unique for Ffar4L, position 720 - 741)

hFfar4 aagagggtgcggaagagc

Note: Using these primers, PCR reactions will detect Ffar4S+Ffar4L or only Ffar4L, but not Ffar4S alone.



## Genetic Proxy for FFAR4 Inhibition, Genotyping, and Human Echocardiography Cohort Development

We used the *FFAR4* R270H coding mutation (rs116454156) as a genetic proxy for Ffar4 inhibition. The R270H polymorphism has previously been associated with morbid obesity in a European population (OR [95% CI]: 1.62 [1.31, 2.00],  $P=8.00 \times 10^{-6}$ <sup>11</sup>). Furthermore, functional analysis of Ffar4 R270H signaling in cell culture indicated that this polymorphism does not signal, and equimolar expression of the R270H with WT receptor to mimic haploinsufficiency reduced signaling by approximately 50%.<sup>11</sup>

Clinical and genotype information were derived from BioVU, the Vanderbilt University Medical Center (VUMC) biorepository that links de-identified electronic health records to DNA samples and genetic data.<sup>12</sup> Echocardiographic parameters were extracted from clinical transthoracic echocardiography (TTE).<sup>13</sup> Genotyping was performed using the Illumina HumanExome BeadChip array v.1.0 ([http://genome.sph.umich.edu/wiki/Exome\\_Chip\\_Design](http://genome.sph.umich.edu/wiki/Exome_Chip_Design)) with standard quality control filters applied at both the individual and genotype level.<sup>14</sup> This platform contains ~250,000 single nucleotide polymorphisms (SNPs), including the *FFAR4* R270H variant.

The study cohort included adults of European ancestry who had undergone clinically indicated transthoracic echocardiography (TTE) and were previously genotyped as part of several BioVU research initiatives.

## Statistics

Cardiac phenotyping was analyzed using an independent samples, Welch's t-test, comparing WT TAC mice to Ffar4KO TAC mice, to test the hypothesis that the Ffar4KO would have different cardiac phenotypes when under TAC, versus the WT, and to account for the unequal variances observed between the sham and TAC groups. Data from cell death experiments were analyzed with a two-way or three-way ANOVA followed by a Tukey post-hoc analysis as indicated. Where specified, principal components analysis (PCA) was used for dimension reduction of oxylipin matrices on log-transformed, standardized concentrations. Mixed models were used to account for within mouse time-dependent changes in oxylipins. Statistical significance was set at 0.05; Tukey's test was used to test for specified post-hoc differences using JMP version 13.2.1. Multiple linear regression was used to evaluate the association between *FFAR4* R270H and echocardiographic parameters adjusting for sex and age at echocardiogram. All subjects were of European descent. Bonferroni correction was applied to

account for multiple testing (two phenotypes), meaning that a *P* value less than 0.025 was considered statistically significant (0.05/2).

### **Study Approvals**

*Animal:* All procedures on animals conformed to the NIH Guide for the Care and Use of Laboratory Animals and were reviewed and approved by the Institutional Animal Care and Use Committee at the University of Minnesota.

*Human:* All tissue samples and data used in this study were deidentified. Heart tissue was collected by and subsequently obtained from the Duke Human Heart Repository and approved by the Duke University Institutional Review Board. All analyses of human derived echocardiographic data were approved by the Vanderbilt University Medical Center Institutional Review Board. The present study complies with the Declaration of Helsinki.

*Additional compliance statements:* For all surgeries, mice were anesthetized by induction with 3% isoflurane, and once anesthesia was induced, mice were maintained at 1.5% isoflurane, and verified by toe-pinch. Post-surgery, buprenorphine (0.1 mg/kg IP) was administered for pain management during the first 24 hours post-surgery and as needed thereafter. At the indicated time points post-surgery or for the isolation of cardiac myocytes, mice were anesthetized with 3% isoflurane, verified by toe-pinch, followed by removal of the heart in accordance with recommendations from the American Veterinary Medical Association. Finally, the data underlying this article are available in the article and in its online supplementary material.

## References

1. Chen J, Shearer GC, Chen Q, Healy CL, Beyer AJ, Nareddy VB, Gerdes AM, Harris WS, O'Connell TD and Wang D. Omega-3 fatty acids prevent pressure overload-induced cardiac fibrosis through activation of cyclic GMP/protein kinase G signaling in cardiac fibroblasts. *Circulation*. 2011;123:584-93.
2. Eclöv JA, Qian Q, Redetzke R, Chen Q, Wu SC, Healy CL, Ortmeier SB, Harmon E, Shearer GC and O'Connell TD. EPA, not DHA, prevents fibrosis in pressure overload induced heart failure; potential role of free fatty acid receptor 4. *J Lipid Res*. 2015;56:2297-2308.
3. O'Connell TD, Ishizaka S, Nakamura A, Swigart PM, Rodrigo MC, Simpson GL, Cotecchia S, Rokosh DG, Grossman W, Foster E and Simpson PC. The alpha(1A/C)- and alpha(1B)-adrenergic receptors are required for physiological cardiac hypertrophy in the double-knockout mouse. *J Clin Invest*. 2003;111:1783-1791.
4. O'Connell TD, Swigart PM, Rodrigo MC, Ishizaka S, Joho S, Turnbull L, Tecott LH, Baker AJ, Foster E, Grossman W and Simpson PC. Alpha1-adrenergic receptors prevent a maladaptive cardiac response to pressure overload. *J Clin Invest*. 2006;116:1005-15.
5. Nakamura A, Rokosh DG, Paccanaro M, Yee RR, Simpson PC, Grossman W and Foster E. LV systolic performance improves with development of hypertrophy after transverse aortic constriction in mice. *Am J Physiol Heart Circ Physiol*. 2001;281:H1104-12.
6. O'Connell TD, Rodrigo MC and Simpson PC. Isolation and culture of adult mouse cardiac myocytes. *Methods Mol Biol*. 2007;357:271-96.
7. Huang Y, Wright CD, Merkwang CL, Baye NL, Liang Q, Simpson PC and O'Connell TD. An alpha1A-adrenergic-extracellular signal-regulated kinase survival signaling pathway in cardiac myocytes. *Circulation*. 2007;115:763-72.
8. Dahl EF, Wu SC, Healy CL, Perry J and O'Connell TD. ERK mediated survival signaling is dependent on the Gq-G-protein coupled receptor type and subcellular localization in adult cardiac myocytes. *J Mol Cell Cardiol*. 2018.
9. Huang Y, Wright CD, Kobayashi S, Healy CL, Elgethun M, Cypher A, Liang Q and O'Connell TD. GATA4 is a survival factor in adult cardiac myocytes but is not required for {alpha}1A-adrenergic receptor survival signaling. *Am J Physiol*. 2008;295:H699-707.
10. Schechter MA, Hsieh MK, Njoroge LW, Thompson JW, Soderblom EJ, Feger BJ, Troupes CD, Hershberger KA, Ilkayeva OR, Nagel WL, Landinez GP, Shah KM, Burns VA, Santacruz L, Hirschey MD, Foster MW, Milano CA, Moseley MA, Piacentino V, 3rd and

- Bowles DE. Phosphoproteomic profiling of human myocardial tissues distinguishes ischemic from non-ischemic end stage heart failure. *PLoS One*. 2014;9:e104157.
11. Ichimura A, Hirasawa A, Poulain-Godefroy O, Bonnefond A, Hara T, Yengo L, Kimura I, Leloire A, Liu N, Iida K, Choquet H, Besnard P, Lecoeur C, Vivequin S, Ayukawa K, Takeuchi M, Ozawa K, Tauber M, Maffei C, Morandi A, Buzzetti R, Elliott P, Pouta A, Jarvelin MR, Korner A, Kiess W, Pigeyre M, Caiazzo R, Van Hul W, Van Gaal L, Horber F, Balkau B, Levy-Marchal C, Rouskas K, Kouvatsi A, Hebebrand J, Hinney A, Scherag A, Pattou F, Meyre D, Koshimizu TA, Wolowczuk I, Tsujimoto G and Froguel P. Dysfunction of lipid sensor GPR120 leads to obesity in both mouse and human. *Nature*. 2012;483:350-4.
  12. Roden DM, Pulley JM, Basford MA, Bernard GR, Clayton EW, Balsler JR and Masys DR. Development of a large-scale de-identified DNA biobank to enable personalized medicine. *Clin Pharmacol Ther*. 2008;84:362-9.
  13. Wells QS, Farber-Eger E and Crawford DC. Extraction of echocardiographic data from the electronic medical record is a rapid and efficient method for study of cardiac structure and function. *J Clin Bioinforma*. 2014;4:12.
  14. Guo Y, He J, Zhao S, Wu H, Zhong X, Sheng Q, Samuels DC, Shyr Y and Long J. Illumina human exome genotyping array clustering and quality control. *Nat Protoc*. 2014;9:2643-62.

## Supplemental Tables and Figures

### Supplemental Figure 1: Ffar4 is not necessary for an adaptive response to TAC in female mice.

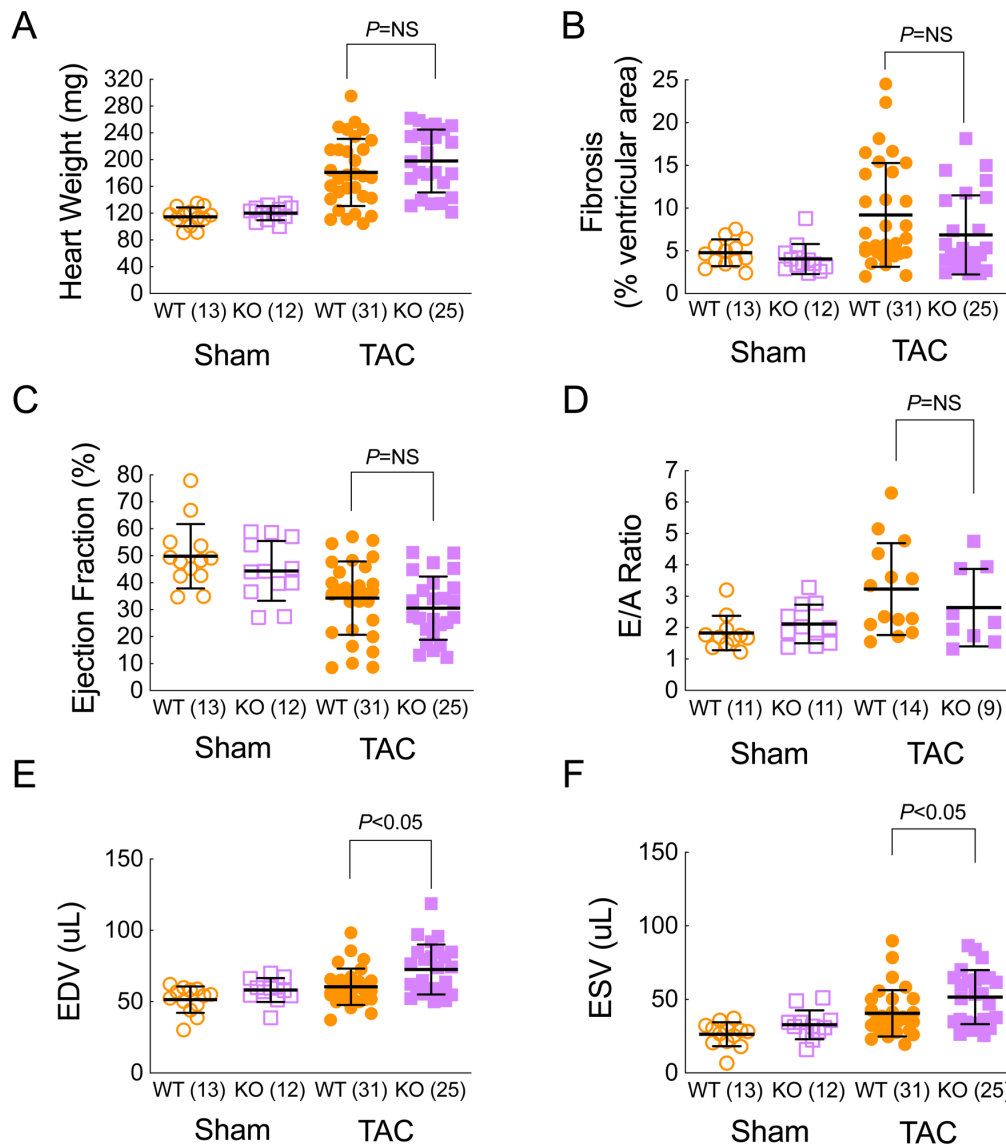

**Supplemental Figure 1.** Four weeks following TAC or sham surgery, cardiac function was measured by echocardiography and mice were euthanized and hearts were collected for morphological analysis. All data shown are for female wild-type (WT) and Ffar4KO (KO) mice **A**, Heart weight (HW). **B**, Ventricular fibrosis quantified by fibrotic area (Sirius red)/total ventricular area (Fast green). **C**, Ejection fraction (EF, %). **D**, E/A ratio. **E**, end diastolic volume (EDV) **F**, end systolic volume (ESV) Data were compared by a Welch's two sample t test. Error bars represent the mean with SD.

## Supplemental Figure 2: Cytoplasmic phospholipase A<sub>2</sub> $\alpha$ -dependent synthesis of enzymatically produced oxygenated fatty acids

A.

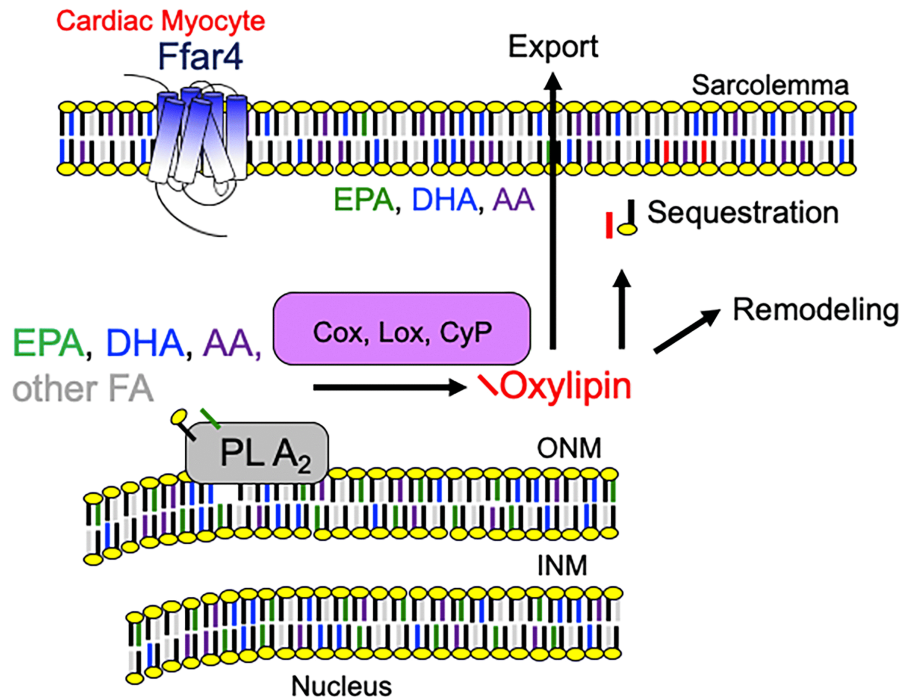

B.

|                          | Cox                                                         | Lox                                                | Cyp <sub>hyd</sub>            | Cyp <sub>epox</sub> |
|--------------------------|-------------------------------------------------------------|----------------------------------------------------|-------------------------------|---------------------|
| EPA<br>Anti-inflammatory | PG <sub>3</sub><br>HEPEs<br>E-Resolvins<br>(18-HEPE, AcCox) | HEPEs<br>LTB <sub>5</sub>                          | HEPEs<br>EpETE<br>E-Resolvins |                     |
| DHA<br>Anti-inflammatory | Protectins<br>D-Resolvins 1-4                               | HDHAs<br>Protectins<br>D-Resolvins 1-6<br>Maresins | HDoHEs<br>EpEPE, DiHDPE       |                     |
| AA<br>Pro-inflammatory   | PG <sub>2</sub>                                             | HETEs<br>LTB <sub>4</sub>                          | HETEs<br>EET                  |                     |

**Supplemental Figure 2.** A. In cells, activation of cytoplasmic phospholipase A<sub>2</sub> $\alpha$  facilitates the production of enzymatically-modified oxygenated fatty acids (FA), or oxylipins, with pro-inflammatory, anti-inflammatory, or pro-resolving effects. cPLA<sub>2</sub> $\alpha$  is activated by upstream signaling cascades, in this example Ffar4. Upon activation cPLA<sub>2</sub> $\alpha$  translocates to the nucleus and cleaves FAs from the sn-2 position of membrane phospholipids. Released FAs, most

commonly thought to be arachadonic acid (AA), but can be any FA, including eicosapentaenoic acid (EPA), docosahexaenoic acid (DHA), or linoleic acid (LA), can then be further oxidatively modified by cyclooxygenases (Cox), lipoxygenases (Lox), cytochrome P450 hydroxylases or cytochrome P450 epoxygenases. These oxygenated FAs, or oxylipins, can undergo one of four fates; 1. Sequestration back into cellular membranes, 2. Left free in the intracellular space to act as intracellular signaling molecules or be further enzymatically modified, for example the modification of 18-HEPE to produce E-resolvins; 3. Exported from the cell in lipoproteins, primarily HDL, 4. Exported as a free oxylipin. B. Oxylipins are classified by their parent FA (AA, EPA, DHA, ...) and by the enzyme that produced each specific class of oxylipin. The table indicates oxylipin class defined by the parent FA.

**Supplemental Figure 3:** 18-HEPE is elevated in HDL from female versus male Ffar4KO mice, but significantly lower than 18-HEPE in HDL from WT mice.

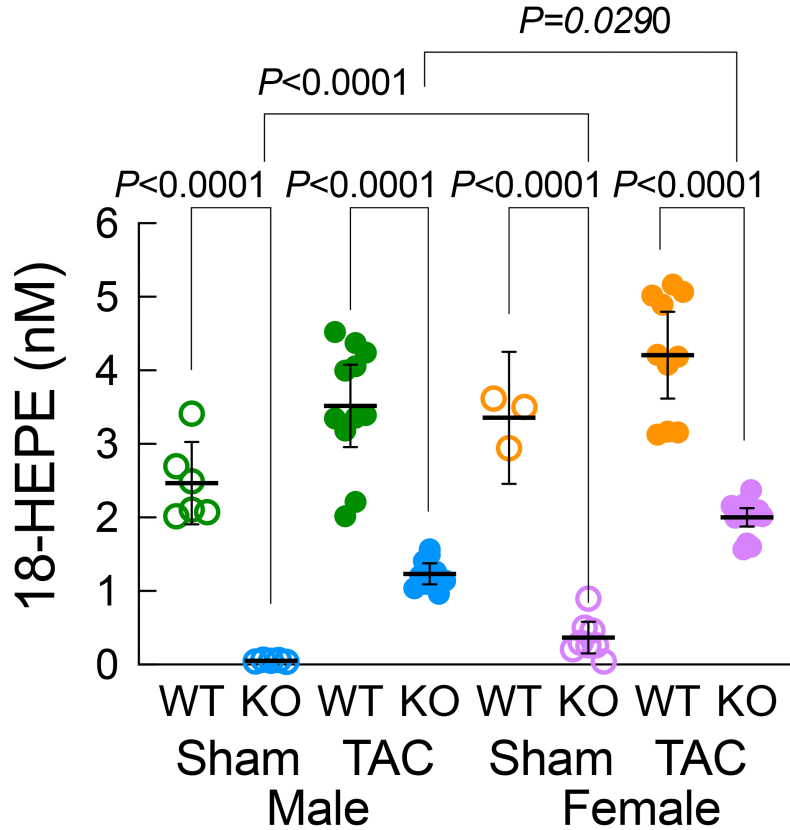

**Supplemental Figure 3.** Plasma was collected 4 weeks following TAC or sham surgery, and 18-HEPE in HDL was detected by liquid chromatography/mass spectrometry. Fold-differences (95% CIs) are shown.



**Supplemental Table 1.** DYETS, Inc #180539 Chow Composition Table

| <b>Ingredient</b>   | <b>kcal/gm</b> | <b>grams/kg</b> | <b>kcal/kg</b> |
|---------------------|----------------|-----------------|----------------|
| Casein              | 3.58           | 140             | 501            |
| Sucrose             | 4              | 100             | 400            |
| Cornstarch          | 3.6            | 466             | 1676           |
| Dyetrose            | 3.8            | 155             | 589            |
| L-Cystine           | 4              | 1.8             | 7.2            |
| Cellulose           | 0              | 50              | 0              |
| Corn Oil            | 9              | 40              | 360            |
| t-Butylhydroquinone | 0              | 0.008           | 0              |
| Mineral Mix #210050 | 0.84           | 35              | 29.4           |
| Vitamin Mix #310025 | 3.87           | 10              | 38.7           |
| Choline Bitartrate  | 0              | 2.5             | 0              |
| <b>TOTALS</b>       |                | <b>1000.00</b>  | <b>3601</b>    |

**Supplemental Table 2A.** Male fatty acid levels 4 weeks post-TAC measured by mass spectrometry.

| Fatty Acid (abbreviation) | WT Sham (12) | KO Sham (11) | WT TAC (24)  | KO TAC (20)   |
|---------------------------|--------------|--------------|--------------|---------------|
| C22:6n3 (DHA)             | 3.56 ± 0.76  | 3.59 ± 0.93  | 3.76 ± 0.74  | 3.71 ± 0.92   |
| C22:5n3 (n3DPA)           | 0.27 ± 0.04  | 0.29 ± 0.05  | 0.31 ± 0.16  | 0.25 ± 0.08   |
| C22:5n6 (n6DPA)           | 2.38 ± 0.70  | 1.92 ± 0.39  | 2.31 ± 0.57  | 2.21 ± 0.66   |
| C22:4n6 (n6DTA)           | 2.17 ± 0.39  | 1.98 ± 0.43  | 2.10 ± 0.58  | 2.06 ± 0.63   |
| C20:5n3 (EPA)             | 0.12 ± 0.07  | 0.13 ± 0.11  | 0.24 ± 0.25  | 0.13 ± 0.08*  |
| C20:4n6 (AA)              | 12.91 ± 2.00 | 12.94 ± 2.91 | 12.40 ± 2.46 | 12.74 ± 2.94  |
| C20:3n6 (dgLA)            | 1.42 ± 0.28  | 1.40 ± 0.39  | 1.49 ± 0.32  | 1.42 ± 0.43   |
| C20:2n6 (EDA)             | 0.24 ± 0.05  | 0.21 ± 0.08  | 0.32 ± 0.21  | 0.20 ± 0.09   |
| C18:3n3 (αLA)             | 0.12 ± 0.09  | 0.13 ± 0.11  | 0.14 ± 0.17  | 0.16 ± 0.09   |
| C18:3n6 (gLA)             | 0.07 ± 0.06  | 0.10 ± 0.13  | 0.16 ± 0.38  | 0.14 ± 0.22   |
| C18:2n6 (LA)              | 11.96 ± 1.11 | 11.26 ± 1.98 | 11.47 ± 1.63 | 11.59 ± 2.58  |
| C20:1n9 (EA)              | 0.41 ± 0.14  | 0.33 ± 0.14  | 0.50 ± 0.14  | 0.39 ± 0.21   |
| C24:0 (LgA)               | 0.22 ± 0.16  | 0.26 ± 0.15  | 0.33 ± 0.32  | 0.24 ± 0.16   |
| C20:0 (ArcA)              | 0.18 ± 0.08  | 0.27 ± 0.26  | 0.32 ± 0.35  | 0.26 ± 0.19   |
| C18:1n7 (VA)              | 2.04 ± 0.44  | 1.89 ± 0.33  | 2.36 ± 0.35  | 2.23 ± 0.59   |
| C18:1n9 (OA)              | 12.55 ± 1.00 | 12.54 ± 1.22 | 13.21 ± 1.58 | 12.33 ± 1.69  |
| C18:1n12                  | 0.10 ± 0.05  | 0.10 ± 0.96  | 0.13 ± 0.12  | 0.14 ± 0.11   |
| C18:1t (EIA)              | 0.24 ± 0.22  | 0.26 ± 0.27  | 0.23 ± 0.24  | 0.30 ± 0.27   |
| C18:0 (SA)                | 14.58 ± 1.41 | 14.10 ± 1.66 | 13.68 ± 1.43 | 13.78 ± 1.89  |
| C17:0                     | 0.31 ± 0.05  | 0.51 ± 0.58  | 0.53 ± 0.78  | 0.52 ± 0.72   |
| C16:1n7 (POA)             | 0.79 ± 0.25  | 0.95 ± 0.28  | 0.94 ± 0.25  | 1.09 ± 0.51   |
| C16:0 (PA)                | 32.45 ± 2.26 | 33.69 ± 2.30 | 32.04 ± 1.88 | 33.13 ± 1.84* |
| C15:0                     | 0.37 ± 0.49  | 0.24 ± 0.23  | 0.23 ± 0.17  | 0.27 ± 0.20   |
| C14:0 (MA)                | 0.32 ± 0.16  | 0.39 ± 0.41  | 0.39 ± 0.32  | 0.35 ± 0.22   |
| C12:0 (LA)                | 0.24 ± 0.28  | 0.50 ± 1.08  | 0.43 ± 1.06  | 0.62 ± 1.48   |

Data are presented as mean ± standard deviation for the number of mice indicated in parentheses. DHA, docosahexaenoic acid; n3DPA, n-3 docosapentaenoic acid (clupanodionic acid); n6DPA, n-6 docosapentaenoic acid (osbond acid); n6DTA, adrenic acid; EPA, eicosapentaenoic acid; AA, arachidonic acid; dgLA, dihomo-gamma-linolenic acid; EDA, eicosadienoic acid; αLA, alpha-linolenic acid; gLA, gamma-linolenic acid; LA, linoleic acid; EA, eicosenoic acid; LgA, lignoceric acid; ArcA, arachidic acid; VA, cis-vaccenic acid; OA, oleic acid; EIA, elaidic acid; SA, stearic acid; POA, palmitoleic acid; PA, palmitic acid; MA, myristic acid; LA, lauric acid. \* Indicates  $P < 0.05$  vs WT TAC.

**Supplemental Table 2B.** Female fatty acid levels 4 weeks post-TAC measured by mass spectrometry.

| Fatty Acid (abbreviation) | WT Sham (12) | KO Sham (12) | WT TAC (31)  | KO TAC (25)   |
|---------------------------|--------------|--------------|--------------|---------------|
| C22:6n3 (DHA)             | 4.59 ± 0.54  | 4.69 ± 0.50  | 4.19 ± 0.36  | 4.21 ± 0.89   |
| C22:5n3 (n3DPA)           | 0.21 ± 0.05  | 0.22 ± 0.06  | 0.24 ± 0.07  | 0.26 ± 0.20   |
| C22:5n6 (n6DPA)           | 2.34 ± 0.33  | 2.02 ± 0.45  | 2.46 ± 0.45  | 2.15 ± 0.54*  |
| C22:4n6 (n6DTA)           | 2.56 ± 0.22  | 2.33 ± 0.48  | 2.42 ± 0.25  | 2.22 ± 0.49   |
| C20:5n3 (EPA)             | 0.17 ± 0.14  | 0.10 ± 0.05  | 0.21 ± 0.15  | 0.13 ± 0.19   |
| C20:4n6 (AA)              | 14.42 ± 1.60 | 14.73 ± 1.95 | 13.90 ± 1.41 | 13.87 ± 2.58  |
| C20:3n6 (dgLA)            | 1.30 ± 0.20  | 1.21 ± 0.29  | 1.32 ± 0.19  | 1.16 ± 0.33*  |
| C20:2n6 (EDA)             | 0.22 ± 0.07  | 0.16 ± 0.07  | 0.27 ± 0.07  | 0.21 ± 0.15   |
| C18:3n3 (αLA)             | 0.10 ± 0.14  | 0.06 ± 0.04  | 0.08 ± 0.06  | 0.11 ± 0.19   |
| C18:3n6 (gLA)             | 0.05 ± 0.03  | 0.03 ± 0.03  | 0.06 ± 0.06  | 0.07 ± 0.08   |
| C18:2n6 (LA)              | 10.92 ± 1.34 | 10.56 ± 1.16 | 10.37 ± 0.96 | 10.37 ± 1.69  |
| C20:1n9 (EA)              | 0.29 ± 0.11  | 0.18 ± 0.13  | 0.41 ± 0.09  | 0.23 ± 0.14*  |
| C24:0 (LgA)               | 0.25 ± 0.12  | 0.20 ± 0.11  | 0.31 ± 0.19  | 0.27 ± 0.24   |
| C20:0 (ArcA)              | 0.17 ± 0.09  | 0.12 ± 0.05  | 0.22 ± 0.12  | 0.17 ± 0.27   |
| C18:1n7 (VA)              | 1.83 ± 0.28  | 1.40 ± 0.36  | 2.14 ± 0.32  | 1.86 ± 0.48*  |
| C18:1n9 (OA)              | 13.42 ± 1.74 | 13.07 ± 0.62 | 14.12 ± 0.80 | 13.22 ± 1.92* |
| C18:1n12                  | 0.09 ± 0.05  | 0.08 ± 0.03  | 0.12 ± 0.08  | 0.18 ± 0.35   |
| C18:1t (EIA)              | 0.16 ± 0.12  | 0.14 ± 0.09  | 0.20 ± 0.14  | 0.23 ± 0.30   |
| C18:0 (SA)                | 15.52 ± 1.36 | 15.68 ± 1.51 | 15.39 ± 1.63 | 15.60 ± 2.49  |
| C17:0                     | 0.25 ± 0.05  | 0.25 ± 0.06  | 0.36 ± 0.21  | 0.29 ± 0.16   |
| C16:1n7 (POA)             | 0.71 ± 0.20  | 0.50 ± 0.13  | 0.83 ± 0.46  | 0.65 ± 0.22   |
| C16:0 (PA)                | 29.88 ± 1.70 | 31.84 ± 1.67 | 29.62 ± 1.78 | 31.73 ± 1.81* |
| C15:0                     | 0.20 ± 0.20  | 0.12 ± 0.04  | 0.22 ± 0.18  | 0.19 ± 0.22   |
| C14:0 (MA)                | 0.30 ± 0.10  | 0.22 ± 0.05  | 0.38 ± 0.28  | 0.39 ± 0.45   |
| C12:0 (LA)                | 0.12 ± 0.11  | 0.10 ± 0.04  | 0.18 ± 0.16  | 0.28 ± 0.58   |

Data are presented as mean ± standard deviation for the number of mice indicated in parentheses. DHA, docosahexaenoic acid; n3DPA, n-3 docosapentaenoic acid (clupanodionic acid); n6DPA, n-6 docosapentaenoic acid (osbond acid); n6DTA, adrenic acid; EPA, eicosapentaenoic acid; AA, arachidonic acid; dgLA, dihomogamma-linolenic acid; EDA, eicosadienoic acid; αLA, alpha-linolenic acid; gLA, gamma-linolenic acid; LA, linoleic acid; EA, eicosenoic acid; LgA, lignoceric acid; ArcA, arachidic acid; VA, cis-vaccenic acid; OA, oleic acid; EIA, elaidic acid; SA, stearic acid; POA, palmitoleic acid; PA, palmitic acid; MA, myristic acid; LA, lauric acid. \* Indicates  $P < 0.05$  vs WT TA

**Supplemental Table 3A. Male morphological parameters 4 weeks post-TAC.**

| MORPHOLOGICAL | WT SHAM<br>(12)   | KO SHAM<br>(11) | WT TAC<br>(24)     | KO TAC<br>(20) |
|---------------|-------------------|-----------------|--------------------|----------------|
| HW (mg)       | 142.3 ± 21.1      | 137.2 ± 12.8    | 196.6 ± 42.1       | 228.9 ± 45.8*  |
| BW (g)        | 27.3 ± 2.2        | 27.1 ± 1.1      | 26.4 ± 1.3         | 26.3 ± 2.1     |
| HW/BW (mg/g)  | 5.2 ± 0.7         | 5.1 ± 0.5       | 7.45 ± 1.6         | 8.2 ± 2.3*     |
| LW (mg)       | 175.6 ± 13.1 (11) | 175.0 ± 18.4    | 224.6 ± 101.8 (21) | 293.0 ± 147.0  |
| Fibrosis (%)  | 4.3 ± 1.7         | 3.3 ± 0.9       | 8.8 ± 6.1          | 8.7 ± 5.4      |

Data are presented as Mean ± standard deviation for the number of mice indicated in parentheses. HR, heart rate; BW, body weight; LW, lung weight. \* Indicates  $P < 0.05$  vs WT TAC

**Supplemental Table 3B. Male cardiac function 4 weeks post-TAC measured by echocardiography.**

| CARDIAC FUNCTION | WT SHAM<br>(12)   | KO SHAM<br>(11) | WT TAC<br>(24)  | KO TAC<br>(20)   |
|------------------|-------------------|-----------------|-----------------|------------------|
| HR (bpm)         | 430 ± 52          | 423 ± 30        | 465 ± 67        | 473 ± 41         |
| SV (μl)          | 28.5 ± 4.4        | 29.6 ± 4.4      | 23.8 ± 7.9      | 21.2 ± 9.6       |
| EF (%)           | 43.4 ± 7.0        | 44.6 ± 6.0      | 35.7 ± 13.6     | 27.6 ± 12.2*     |
| FS (%)           | 21.2 ± 4.1        | 21.8 ± 3.4      | 17.2 ± 7.3      | 12.9 ± 6.3*      |
| EDV (μl)         | 66.3 ± 7.9        | 67.1 ± 10.2     | 70.4 ± 16.5     | 78.8 ± 17.0      |
| ESV (μl)         | 37.7 ± 7.6        | 37.5 ± 8.3      | 46.6 ± 19.7     | 57.6 ± 18.1      |
| CO (ml/min)      | 12.4 ± 2.8        | 12.5 ± 2.1      | 10.8 ± 3.4      | 10.0 ± 4.8       |
| IVS;s (mm)       | 1.0 ± 0.2         | 1.0 ± 0.2       | 1.3 ± 0.2       | 1.3 ± 0.2        |
| IVS;d (mm)       | 0.8 ± 0.1         | 0.8 ± 0.2       | 1.0 ± 0.2       | 1.1 ± 0.2        |
| LVID;s (mm)      | 3.1 ± 0.2         | 3.1 ± 0.3       | 3.3 ± 0.6       | 3.7 ± 0.5*       |
| LVID;d (mm)      | 3.9 ± 0.2         | 3.9 ± 0.3       | 4.0 ± 0.4       | 4.2 ± 0.4*       |
| LVPW;s (mm)      | 1.1 ± 0.1         | 1.0 ± 0.1       | 1.2 ± 0.2       | 1.3 ± 0.2        |
| LVPW;d (mm)      | 0.8 ± 0.1         | 0.8 ± 0.1       | 1.0 ± 0.2       | 1.1 ± 0.2        |
| E/A              | 1.6 ± 0.2 (10)    | 1.95 ± 0.4      | 1.95 ± 0.7 (15) | 3.23 ± 0.4 (14)* |
| E (mm/s)         | 496.2 ± 77.8 (11) | 507.3 ± 75.8    | 647.8 ± 140.0   | 627.2 ± 137.5    |
| E/E'             | 27.2 ± 4.2 (5)    | 27.7 ± 6.4 (4)  | 39.5 ± 12.2 (8) | 47.0 ± 18.3 (5)  |
| AOV (mm/s)       | 798 ± 130         | 750 ± 111       | 3298 ± 638      | 3429 ± 660       |

Data are presented as Mean ± standard deviation for the number of mice indicated in parentheses. HR, heart rate; SV, stroke volume; EF, ejection fraction; FS, fractional shortening; EDV, end diastolic volume; ESV, end systolic volume; CO, cardiac output; IVS;s, interventricular septal thickness at systole; IVS;d, interventricular septal thickness at diastole; LVID;s, left ventricular internal diameter systole; LVID;d, left ventricular internal diameter diastole; LVPW;s, left ventricular posterior wall systole; LVPW;d, left ventricular posterior wall diastole; E/A, early mitral valve filling velocity/ late mitral valve filling velocity; E, early mitral valve filling velocity ; E/E', early mitral valve filling velocity/early mitral annular tissue velocity; AoV, peak aortic velocity. \* Indicates  $P < 0.05$  vs WT TAC.

**Supplemental Table 4A. Female morphological parameters 4 weeks post-TAC.**

| MORPHOLOGICAL | WT SHAM<br>(13)   | KO SHAM<br>(12) | WT TAC<br>(31)     | KO TAC<br>(25) |
|---------------|-------------------|-----------------|--------------------|----------------|
| HW (mg)       | 114.7 ± 14.0      | 120.2 ± 10.8    | 181.0 ± 50.1       | 198.0 ± 46.9   |
| BW (g)        | 21.3 ± 1.4        | 21.6 ± 1.4      | 21.4 ± 1.6         | 21.7 ± 2.3     |
| HW/BW (mg/g)  | 5.4 ± 0.5         | 5.6 ± 0.4       | 8.5 ± 2.5          | 9.3 ± 3.0      |
| LW (mg)       | 165.5 ± 16.5 (12) | 163.2 ± 12.3    | 265.0 ± 150.4 (26) | 311.1 ± 167.8  |
| Fibrosis (%)  | 4.8 ± 1.6         | 4.1 ± 1.8       | 9.2 ± 6.1          | 6.9 ± 4.6      |

Data are presented as Mean ± standard deviation for the number of mice indicated in parentheses. HR, heart rate; BW, body weight; LW, lung weight. \* Indicates  $P < 0.05$  vs WT TAC

**Supplemental Table 4B. Female cardiac function 4 weeks post-TAC measured by echocardiography.**

| CARDIAC FUNCTION | WT SHAM<br>(13) | KO SHAM<br>(12) | WT TAC<br>(31)   | KO TAC<br>(25)  |
|------------------|-----------------|-----------------|------------------|-----------------|
| HR (bpm)         | 431 ± 64        | 431 ± 39        | 474 ± 70         | 486 ± 49        |
| SV (μl)          | 25.2 ± 6.1      | 25.4 ± 6.1      | 19.9 ± 8.2       | 21.0 ± 6.4      |
| EF (%)           | 49.8 ± 11.9     | 44.4 ± 11.1     | 34.3 ± 13.6      | 30.6 ± 11.8     |
| FS (%)           | 25.1 ± 7.9      | 21.8 ± 6.4      | 16.3 ± 7.1       | 14.4 ± 6.0      |
| EDV (μl)         | 51.5 ± 9.2      | 58.2 ± 8.4      | 60.4 ± 12.7      | 72.6 ± 17.5*    |
| ESV (μl)         | 26.3 ± 8.2      | 32.8 ± 9.8      | 40.5 ± 15.6      | 51.6 ± 18.4*    |
| CO (ml/min)      | 10.9 ± 3.3      | 10.9 ± 2.7      | 9.5 ± 4.3        | 10.2 ± 3.3      |
| IVS;s (mm)       | 1.0 ± 0.2       | 1.0 ± 0.3       | 1.2 ± 0.2        | 1.2 ± 0.2       |
| IVS;d (mm)       | 0.8 ± 0.1       | 0.8 ± 0.1       | 1.0 ± 0.2        | 1.0 ± 0.2       |
| LVID;s (mm)      | 2.7 ± 0.4       | 2.9 ± 0.4       | 3.2 ± 0.5        | 3.5 ± 0.5*      |
| LVID;d (mm)      | 3.5 ± 0.3       | 3.7 ± 0.2       | 3.8 ± 0.3        | 4.0 ± 0.4*      |
| LVPW;s (mm)      | 1.1 ± 0.2       | 1.0 ± 0.1       | 1.2 ± 0.2        | 1.2 ± 0.2       |
| LVPW;d (mm)      | 0.8 ± 0.1       | 0.7 ± 0.1       | 1.1 ± 0.2        | 1.0 ± 0.2       |
| E/A              | 1.8 ± 0.6 (11)  | 2.1 ± 0.6 (11)  | 3.2 ± 1.5 (14)   | 2.6 ± 1.2 (9)   |
| E (mm/s)         | 473 ± 153 (12)  | 473 ± 120       | 687 ± 159 (26)   | 638 ± 193       |
| E/E'             | 23.7 ± 3.1 (3)  | 29.0 ± 10.0 (2) | 63.9 ± 30.8 (10) | 67.3 ± 30.5 (8) |
| AOV (mm/s)       | 736 ± 129       | 641 ± 108       | 3071 ± 683       | 3236 ± 491      |

Data are presented as Mean ± standard deviation for the number of mice indicated in parentheses. HR, heart rate; SV, stroke volume; EF, ejection fraction; FS, fractional shortening; EDV, end diastolic volume; ESV, end systolic volume; CO, cardiac output; IVS;s, interventricular septal thickness at systole; IVS;d, interventricular septal thickness at diastole; LVID;s, left ventricular internal diameter systole; LVID;d, left ventricular internal diameter diastole; LVPW;s, left ventricular posterior wall systole; LVPW;d, left ventricular posterior wall diastole; E/A, early mitral valve filling velocity/late mitral valve filling velocity; E, early mitral valve filling velocity; E/E', early mitral valve filling velocity/early mitral annular tissue velocity; AoV, peak aortic velocity. \* Indicates  $P < 0.05$  vs WT TAC.

### Supplemental Table 5. Cell Death Genes

GO Terms: Apoptosis, apoptotic, necrosis, necrotic, cell death

| Genes Unique to<br>FFAR4 KO Sham vs<br>FFAR4 KO TAC:<br>22 increased,<br>6 decreased |                | Genes Unique to<br>WT Sham vs<br>WT TAC:<br>138 increased,<br>70 decreased |                | Genes Shared by<br>FFAR4 KO Sham vs<br>FFAR4 KO TAC<br>and WT Sham vs WT TAC:<br>161 increased, 71 decreased |                      |                      |
|--------------------------------------------------------------------------------------|----------------|----------------------------------------------------------------------------|----------------|--------------------------------------------------------------------------------------------------------------|----------------------|----------------------|
| Gene ID                                                                              | Fold<br>Change | Gene ID                                                                    | Fold<br>Change | Gene ID                                                                                                      | Fold<br>Change<br>KO | Fold<br>Change<br>WT |
| Atf3                                                                                 | 3.406          | Il1rn                                                                      | 219.636        | Lox                                                                                                          | 24.312               | 34.324               |
| Cx3cl1                                                                               | 2.987          | Adam8                                                                      | 117.349        | Serpine1                                                                                                     | 16.010               | 24.941               |
| Igf1                                                                                 | 2.787          | Timp1                                                                      | 112.492        | Ankrd1                                                                                                       | 10.962               | 6.718                |
| Dcun1d3                                                                              | 2.125          | Spp1                                                                       | 85.235         | Cd44                                                                                                         | 9.335                | 9.640                |
| Csrnp1                                                                               | 2.035          | Krt18                                                                      | 51.556         | Tgfb2                                                                                                        | 8.828                | 10.745               |
| Cyba                                                                                 | 2.019          | Ankrd2                                                                     | 47.887         | Gadd45g                                                                                                      | 8.745                | 8.200                |
| Ero1l                                                                                | 1.889          | Lrp8                                                                       | 37.091         | Dbn1                                                                                                         | 8.621                | 8.140                |
| Errfi1                                                                               | 1.882          | Pak3                                                                       | 32.821         | Fn1                                                                                                          | 7.686                | 8.424                |
| Perp                                                                                 | 1.867          | Sfn                                                                        | 30.744         | Ier3                                                                                                         | 6.883                | 7.312                |
| G2e3                                                                                 | 1.834          | Aldh1a2                                                                    | 26.354         | Thbs1                                                                                                        | 6.419                | 6.000                |
| Ticam1                                                                               | 1.824          | Ccl2                                                                       | 25.129         | Tnfrsf12a                                                                                                    | 6.239                | 6.057                |
| Mfge8                                                                                | 1.814          | Hmox1                                                                      | 24.043         | Nes                                                                                                          | 5.264                | 3.962                |
| Nqo1                                                                                 | 1.799          | Birc5                                                                      | 18.964         | Hspb1                                                                                                        | 4.956                | 5.753                |
| Ercc6                                                                                | 1.776          | Cdk1                                                                       | 17.992         | Ccl6                                                                                                         | 4.955                | 4.562                |
| Trim27                                                                               | 1.769          | Gdf15                                                                      | 17.833         | Phlda1                                                                                                       | 4.576                | 4.771                |
| Bcl2                                                                                 | 1.768          | Hck                                                                        | 16.390         | Ccl9                                                                                                         | 4.518                | 5.177                |
| Etv6                                                                                 | 1.750          | Ckap2                                                                      | 16.271         | Tgm2                                                                                                         | 4.504                | 4.795                |
| Gclc                                                                                 | 1.747          | Star                                                                       | 16.221         | Emp1                                                                                                         | 4.430                | 5.579                |
| Pnp                                                                                  | 1.740          | Tpx2                                                                       | 15.257         | Tspo                                                                                                         | 4.197                | 4.214                |
| Ruvbl1                                                                               | 1.738          | Top2a                                                                      | 15.100         | Ptprc                                                                                                        | 4.103                | 4.334                |
| Ace                                                                                  | 1.732          | Ccr2                                                                       | 14.716         | Fcgr3                                                                                                        | 3.993                | 3.074                |
| Sqstm1                                                                               | 1.706          | Crlf1                                                                      | 14.542         | Dynll1                                                                                                       | 3.938                | 3.725                |
| Ndufc2                                                                               | -1.708         | Lcn2                                                                       | 14.296         | Clu                                                                                                          | 3.867                | 4.239                |
| Atg4d                                                                                | -1.759         | Inhba                                                                      | 13.724         | Preli1                                                                                                       | 3.718                | 3.329                |
| Fastk                                                                                | -1.790         | Lgals3                                                                     | 13.711         | Ncam1                                                                                                        | 3.705                | 3.728                |
| Ar                                                                                   | -1.853         | Myc                                                                        | 13.703         | Creb3l1                                                                                                      | 3.704                | 4.160                |
| Zfp346                                                                               | -2.280         | Plk1                                                                       | 13.340         | Adcyap1r1                                                                                                    | 3.613                | 4.621                |
| Bmp10                                                                                | -8.321         | Ccl7                                                                       | 12.622         | Prmt2                                                                                                        | 3.606                | 2.954                |
|                                                                                      |                | Cd24a                                                                      | 11.770         | Adamts12                                                                                                     | 3.453                | 3.580                |
|                                                                                      |                | Gdf6                                                                       | 9.741          | Lgals1                                                                                                       | 3.446                | 4.017                |

|          |       |          |       |       |
|----------|-------|----------|-------|-------|
| Ect2     | 9.516 | Plscr1   | 3.381 | 2.523 |
| Havcr2   | 9.472 | Mmp3     | 3.340 | 2.805 |
| Angptl4  | 9.421 | Sfrp1    | 3.307 | 3.030 |
| Bub1b    | 8.822 | Otulin   | 3.303 | 2.893 |
| Plaur    | 7.858 | G6pdx    | 3.290 | 3.119 |
| Ptgs2    | 7.153 | Ctsz     | 3.283 | 3.126 |
| C5ar1    | 7.009 | Ifi204   | 3.274 | 2.803 |
| Pdpm     | 6.605 | Tgfb3    | 3.271 | 2.029 |
| Brca1    | 6.587 | Dap      | 3.227 | 3.250 |
| Pak1     | 6.585 | Gba      | 3.173 | 2.411 |
| Sphk1    | 6.439 | Tmbim1   | 3.161 | 3.685 |
| Nlrc3    | 6.282 | Fndc1    | 3.103 | 2.449 |
| Kif14    | 6.185 | Cfl1     | 3.086 | 3.469 |
| Cit      | 5.892 | Cttn     | 2.980 | 3.271 |
| Cd84     | 5.723 | Ptprf    | 2.946 | 3.562 |
| Fcer1g   | 5.635 | Anxa1    | 2.922 | 2.855 |
| Socs3    | 5.425 | Shb      | 2.914 | 2.708 |
| Tnfrsf23 | 5.322 | Slc25a24 | 2.828 | 2.192 |
| Pf4      | 5.217 | Col18a1  | 2.799 | 3.149 |
| Siglec1  | 4.901 | Mllt11   | 2.797 | 3.626 |
| Clec5a   | 4.882 | Prkcd    | 2.795 | 2.078 |
| Ccr5     | 4.734 | Mal      | 2.792 | 3.251 |
| Cd14     | 4.651 | Adam9    | 2.775 | 2.992 |
| Ncf2     | 4.636 | Arid5a   | 2.752 | 2.228 |
| Asns     | 4.630 | Bak1     | 2.750 | 3.150 |
| Ncf1     | 4.390 | Lmna     | 2.742 | 3.030 |
| Hells    | 4.317 | Sox9     | 2.653 | 2.948 |
| Fcgr2b   | 4.140 | Dab2     | 2.596 | 2.801 |
| Nckap1l  | 4.056 | Syk      | 2.586 | 3.022 |
| Il33     | 4.052 | Gpx1     | 2.585 | 2.557 |
| Coro1a   | 3.957 | Nol12    | 2.579 | 2.751 |
| Itgb3    | 3.912 | Ptgis    | 2.577 | 2.278 |
| Ripk3    | 3.867 | Cd248    | 2.557 | 2.515 |
| Phlda3   | 3.835 | Txnrd1   | 2.544 | 2.756 |
| Ptpn6    | 3.746 | P4hb     | 2.540 | 2.835 |
| Gpnmb    | 3.711 | Usp53    | 2.527 | 3.426 |
| Tlr2     | 3.624 | Creb3    | 2.514 | 2.240 |
| Egr3     | 3.598 | Txndc5   | 2.483 | 2.393 |
| Rad18    | 3.589 | Fam129b  | 2.472 | 2.698 |
| Sdf2l1   | 3.551 | Cdkn1a   | 2.459 | 2.314 |

|           |       |          |       |       |
|-----------|-------|----------|-------|-------|
| Nek6      | 3.546 | Bin1     | 2.452 | 2.310 |
| Tox3      | 3.545 | Actn4    | 2.450 | 2.105 |
| Frzb      | 3.515 | Lgmn     | 2.442 | 2.530 |
| Bnc2      | 3.414 | Ilk      | 2.436 | 2.613 |
| Ada       | 3.300 | Eef1a1   | 2.411 | 2.414 |
| Shq1      | 3.275 | Lpar1    | 2.370 | 2.072 |
| Met       | 3.273 | Flna     | 2.316 | 2.414 |
| Srpx      | 3.268 | Ptk2b    | 2.311 | 2.958 |
| Pik3cg    | 3.245 | Cryab    | 2.295 | 2.313 |
| Mkl1      | 3.236 | Plk2     | 2.294 | 2.215 |
| Inhbb     | 3.229 | Gclm     | 2.284 | 2.564 |
| Spi1      | 3.141 | Anxa5    | 2.281 | 2.446 |
| Dhcr24    | 3.043 | Hcls1    | 2.274 | 2.609 |
| Blm       | 2.997 | Sulf1    | 2.265 | 2.514 |
| Casp3     | 2.931 | Itga4    | 2.244 | 2.883 |
| Cx3cr1    | 2.848 | Itgb1    | 2.223 | 2.307 |
| Rassf5    | 2.806 | Mical1   | 2.222 | 2.817 |
| Pla2g4a   | 2.787 | Tnfrsf1a | 2.209 | 2.301 |
| Tmem173   | 2.787 | Plcg2    | 2.198 | 1.956 |
| Src       | 2.752 | Trp53    | 2.166 | 2.165 |
| Cd300ld   | 2.739 | Sigmar1  | 2.155 | 1.800 |
| Bcl3      | 2.694 | Ppp1r15a | 2.133 | 1.933 |
| Tnfrsf11a | 2.666 | Ecscr    | 2.132 | 2.271 |
| Tnfrsf10b | 2.651 | Hdac6    | 2.132 | 2.373 |
| Eef1e1    | 2.600 | Tlr4     | 2.125 | 2.071 |
| Clip3     | 2.563 | Hmgb2    | 2.122 | 2.469 |
| Arrb2     | 2.484 | Csf1r    | 2.121 | 1.942 |
| Robo1     | 2.443 | Emp2     | 2.111 | 2.255 |
| Pik3cd    | 2.349 | Hif1a    | 2.108 | 2.022 |
| Prkcb     | 2.113 | Lsp1     | 2.106 | 2.371 |
| Cib1      | 2.066 | Ptprj    | 2.104 | 1.777 |
| Bax       | 2.038 | Cybb     | 2.100 | 2.584 |
| Hax1      | 2.033 | Por      | 2.086 | 2.004 |
| Katnb1    | 2.029 | Dlg5     | 2.072 | 2.097 |
| Myd88     | 2.010 | Tnfrsf1b | 2.067 | 2.151 |
| Npm1      | 1.969 | Arf4     | 2.061 | 1.837 |
| Anxa6     | 1.964 | Mt1      | 2.053 | 2.537 |
| Mapk7     | 1.950 | Sra1     | 2.030 | 1.811 |
| Fgfr1     | 1.934 | Capn2    | 2.015 | 2.061 |
| Map1s     | 1.918 | Abcc1    | 2.004 | 1.837 |



|          |        |         |       |       |
|----------|--------|---------|-------|-------|
| Atad5    | 1.912  | Arf6    | 2.001 | 2.160 |
| Brms1    | 1.894  | Sgpl1   | 1.982 | 2.148 |
| Cpne1    | 1.885  | Rnf4    | 1.977 | 1.764 |
| Atf4     | 1.883  | Ltbr    | 1.963 | 2.180 |
| Casp8    | 1.881  | Ywhaz   | 1.958 | 2.058 |
| Rpl11    | 1.877  | Pde1a   | 1.957 | 1.750 |
| Zmat3    | 1.868  | Hmgcr   | 1.955 | 1.999 |
| Apex1    | 1.850  | Ywhah   | 1.951 | 1.874 |
| Gadd45b  | 1.848  | Xbp1    | 1.935 | 1.979 |
| Eif5a    | 1.843  | Shisa5  | 1.935 | 2.218 |
| Map2k1   | 1.839  | Rpl10   | 1.929 | 2.058 |
| Stambp   | 1.834  | Emp3    | 1.922 | 2.850 |
| Bad      | 1.833  | Lrp1    | 1.916 | 1.889 |
| Pigt     | 1.829  | F2r     | 1.915 | 2.004 |
| Clptm1l  | 1.827  | Fem1b   | 1.912 | 1.836 |
| Stat3    | 1.817  | Cxcl16  | 1.906 | 2.152 |
| Ctsc     | 1.815  | Inpp5d  | 1.903 | 2.647 |
| Ppp1r13l | 1.799  | Pa2g4   | 1.890 | 1.892 |
| Ucp2     | 1.792  | Anp32b  | 1.882 | 1.709 |
| Noc2l    | 1.786  | Rassf2  | 1.881 | 1.773 |
| Nup62    | 1.780  | Mcm2    | 1.862 | 2.489 |
| Ufm1     | 1.777  | Hk1     | 1.858 | 2.066 |
| Unc5b    | 1.761  | Hyal2   | 1.853 | 1.806 |
| Slc9a3r1 | 1.753  | Axl     | 1.849 | 2.011 |
| Gnai2    | 1.739  | Mydgf   | 1.849 | 2.087 |
| Cidea    | 1.723  | Pea15a  | 1.849 | 1.775 |
| Ptpn2    | 1.707  | Actr3   | 1.840 | 2.003 |
| Dnmt1    | 1.703  | Fmr1    | 1.834 | 1.908 |
| Hsf1     | -1.702 | Chst11  | 1.834 | 1.836 |
| Opa1     | -1.707 | Dapk3   | 1.833 | 1.719 |
| Aldh2    | -1.721 | Itgav   | 1.831 | 1.859 |
| Asah2    | -1.724 | Tgfb1   | 1.830 | 1.963 |
| Rarg     | -1.731 | Grk5    | 1.827 | 2.082 |
| Ndufs3   | -1.741 | Tgfbr1  | 1.826 | 1.858 |
| Gstp1    | -1.766 | Pak4    | 1.804 | 1.918 |
| Lims1    | -1.767 | Chmp4b  | 1.803 | 1.785 |
| Rora     | -1.767 | B4galt1 | 1.792 | 2.046 |
| Flcn     | -1.783 | Plvap   | 1.789 | 2.024 |
| Pde3a    | -1.798 | Rrp1b   | 1.787 | 1.710 |
| Itpkb    | -1.808 | Ctsb    | 1.785 | 2.093 |

|          |        |         |        |        |
|----------|--------|---------|--------|--------|
| Tek      | -1.816 | Prnp    | 1.777  | 1.799  |
| ErbB4    | -1.844 | Txn1    | 1.763  | 2.159  |
| Akt2     | -1.847 | Ralb    | 1.762  | 1.903  |
| Cep63    | -1.848 | Rara    | 1.750  | 1.728  |
| Txnip    | -1.849 | Crip1   | 1.743  | 2.134  |
| Chchd10  | -1.867 | Gli3    | 1.738  | 2.298  |
| Ypel3    | -1.874 | Gatad2a | 1.732  | 1.816  |
| Jmy      | -1.881 | Ptpn1   | 1.729  | 2.025  |
| Rapgef2  | -1.888 | Plscr3  | 1.726  | 1.934  |
| Endog    | -1.889 | Pmp22   | 1.714  | 1.736  |
| Tbx3     | -1.895 | Shc1    | 1.709  | 2.106  |
| Pde5a    | -1.902 | Pcnt    | -1.708 | -2.008 |
| Alkbh7   | -1.918 | Slc25a4 | -1.709 | -1.835 |
| Kcnb1    | -1.924 | Sort1   | -1.710 | -1.915 |
| Hint2    | -1.935 | Gpam    | -1.714 | -2.049 |
| Rnf146   | -1.940 | Mavs    | -1.722 | -1.791 |
| Sh3kbp1  | -1.968 | Abcb1a  | -1.728 | -2.190 |
| Prkd1    | -1.973 | Wdr92   | -1.730 | -1.893 |
| Sncaip   | -1.974 | Xdh     | -1.731 | -1.825 |
| Rassf3   | -1.976 | Dpep1   | -1.735 | -2.188 |
| Zbtb16   | -1.991 | Cecr2   | -1.753 | -2.072 |
| Six4     | -1.994 | Nsmaf   | -1.755 | -2.085 |
| Pnpla8   | -2.032 | Optn    | -1.760 | -2.252 |
| Aamdc    | -2.040 | Bcl2l11 | -1.769 | -2.251 |
| Col4a3   | -2.048 | Cyfip2  | -1.769 | -2.076 |
| Map3k5   | -2.062 | Acaa2   | -1.772 | -1.909 |
| Kdr      | -2.126 | Cdkn1b  | -1.774 | -1.813 |
| Irf1     | -2.133 | Phlpp1  | -1.779 | -1.766 |
| Epha7    | -2.138 | Smpd2   | -1.791 | -1.964 |
| Zc3h8    | -2.141 | Msh2    | -1.794 | -1.867 |
| Rrm2b    | -2.142 | Jun     | -1.810 | -1.759 |
| Sept4    | -2.144 | Pdcd4   | -1.823 | -1.795 |
| Bmp6     | -2.148 | Tnfaip8 | -1.856 | -2.613 |
| Egr1     | -2.284 | Ube2b   | -1.858 | -2.316 |
| Ackr3    | -2.301 | Nmnat1  | -1.862 | -2.469 |
| Tnfsf10  | -2.362 | Sod2    | -1.863 | -2.121 |
| Id1      | -2.367 | Fgf13   | -1.864 | -1.703 |
| Tmc8     | -2.456 | Agtr1a  | -1.868 | -1.727 |
| Tnfrsf21 | -2.496 | Rgcc    | -1.878 | -2.006 |
| Plekhf1  | -2.527 | Apbb1   | -1.896 | -1.712 |

|         |        |          |        |        |
|---------|--------|----------|--------|--------|
| Camk2b  | -2.688 | Ago4     | -1.916 | -2.475 |
| Rapsn   | -2.692 | Gm20594  | -1.936 | -2.822 |
| Dll1    | -2.711 | Lims2    | -1.938 | -1.930 |
| Wnt5a   | -2.734 | Ndufs1   | -1.943 | -2.387 |
| Gata2   | -2.748 | Tgfb3    | -1.947 | -1.725 |
| Cd28    | -2.776 | Ivns1abp | -1.971 | -2.709 |
| Ceacam1 | -2.786 | Pink1    | -1.974 | -2.209 |
| Cradd   | -2.800 | Mapt     | -1.975 | -2.059 |
| Tpd52l1 | -3.067 | Ahr      | -2.000 | -2.165 |
| Ccdc3   | -3.084 | Vegfb    | -2.001 | -2.218 |
| Map2k6  | -3.425 | Mitf     | -2.008 | -1.789 |
| Gzmm    | -3.537 | Lifr     | -2.033 | -2.257 |
| Gadd45a | -3.622 | Stat5b   | -2.034 | -1.833 |
| Prkcq   | -3.793 | Thrb     | -2.035 | -2.350 |
| Ung     | -3.926 | Ndnf     | -2.038 | -1.973 |
| Atcay   | -5.338 | Sema6a   | -2.086 | -1.958 |
| Ntf3    | -5.417 | Pdk2     | -2.103 | -2.685 |
| Ptgfr   | -5.664 | Mtfp1    | -2.104 | -2.379 |
|         |        | Camk2a   | -2.117 | -1.759 |
|         |        | Fbxo32   | -2.129 | -2.753 |
|         |        | Sox7     | -2.140 | -2.402 |
|         |        | Nqo2     | -2.199 | -2.352 |
|         |        | F3       | -2.209 | -2.642 |
|         |        | Foxo3    | -2.219 | -2.307 |
|         |        | Ccng1    | -2.229 | -2.336 |
|         |        | Ank2     | -2.232 | -2.457 |
|         |        | Egln1    | -2.240 | -2.352 |
|         |        | Rps6ka2  | -2.251 | -2.898 |
|         |        | Abcc8    | -2.273 | -2.690 |
|         |        | Slc2a4   | -2.297 | -2.415 |
|         |        | Ddt      | -2.305 | -2.024 |
|         |        | Pik3r1   | -2.401 | -2.446 |
|         |        | Adamts7  | -2.457 | -2.723 |
|         |        | Ppargc1a | -2.536 | -3.388 |
|         |        | Cd274    | -2.549 | -3.672 |
|         |        | G0s2     | -2.563 | -2.086 |
|         |        | Apip     | -2.620 | -2.852 |
|         |        | Aqp1     | -2.678 | -3.200 |
|         |        | Dusp1    | -2.695 | -3.057 |
|         |        | Gsn      | -2.718 | -3.531 |

|         |        |        |
|---------|--------|--------|
| Herpud1 | -2.751 | -3.134 |
| Angpt1  | -4.454 | -4.113 |

### Supplemental Table 6. Inflammation Genes

GO Terms: monocyte, dendritic cell, macrophage, myeloid, B cell, T cell, lymph, interferon, interleukin, inflammatory, lymphocyte, leukocyte, chemokine, cytokine, immune

Genes Unique to FFAR4  
KO Sham vs FFAR4 KO  
TAC:  
23 increased,  
3 decreased

Genes Unique to  
WT Sham vs  
WT TAC:  
166 increased,  
73 decreased

Genes Shared by  
FFAR4 KO Sham vs  
FFAR4 KO TAC  
and WT Sham vs WT TAC:  
168 increased, 56 decreased

| Gene ID | Fold Change | Gene ID   | Fold Change | Gene ID   | Fold Change KO | Fold Change WT |
|---------|-------------|-----------|-------------|-----------|----------------|----------------|
| Cx3cl1  | 2.987       | Ereg      | 240.348     | Serpine1  | 16.010         | 24.941         |
| Igf1    | 2.787       | Il1rn     | 219.636     | Postn     | 15.162         | 13.826         |
| Il2rg   | 2.152       | Chil3     | 211.386     | Serpina3n | 13.726         | 16.369         |
| Klf6    | 2.127       | Adam8     | 117.349     | Ankrd1    | 10.962         | 6.718          |
| Ahcy    | 2.055       | Timp1     | 112.492     | Col3a1    | 10.165         | 9.226          |
| Cyba    | 2.019       | Arg1      | 94.628      | Itgam     | 9.947          | 10.004         |
| Trove2  | 1.970       | Ankrd2    | 47.887      | Cd44      | 9.335          | 9.640          |
| Maf     | 1.964       | Lrp8      | 37.091      | Tgfb2     | 8.828          | 10.745         |
| Ssc5d   | 1.963       | Cxcl5     | 30.522      | Gadd45g   | 8.745          | 8.200          |
| Errfi1  | 1.882       | Aldh1a2   | 26.354      | Nppb      | 8.688          | 5.931          |
| Flnb    | 1.843       | Ccl2      | 25.129      | Loxl3     | 8.357          | 14.007         |
| Ticam1  | 1.824       | Hmox1     | 24.043      | Fn1       | 7.686          | 8.424          |
| Ifitm3  | 1.805       | Serpina3i | 22.500      | Ier3      | 6.883          | 7.312          |
| Elf4    | 1.792       | Anln      | 22.149      | Itga5     | 6.523          | 7.683          |
| Trim27  | 1.769       | Ccnb2     | 19.624      | Thbs1     | 6.419          | 6.000          |
| Bcl2    | 1.768       | Birc5     | 18.964      | Fyb       | 6.236          | 5.579          |
| Smad1   | 1.757       | Cxcr6     | 18.350      | Prg4      | 6.235          | 6.559          |
| Pnp     | 1.740       | Hck       | 16.390      | Ctss      | 6.082          | 6.240          |
| Ace     | 1.732       | Ckap2     | 16.271      | Sbno2     | 5.549          | 5.008          |
| Eif2ak4 | 1.724       | Star      | 16.221      | Capg      | 5.358          | 5.617          |
| Tinagl1 | 1.720       | Ccr2      | 14.716      | Lcp1      | 5.083          | 6.470          |
| Prex1   | 1.716       | Lcn2      | 14.296      | Il4ra     | 5.027          | 4.673          |
| Sqstm1  | 1.706       | Lgals3    | 13.711      | Hspb1     | 4.956          | 5.753          |
| Ndufc2  | -1.708      | Myc       | 13.703      | Ccl6      | 4.955          | 4.562          |
| Hdac9   | -1.759      | Plk1      | 13.340      | Msn       | 4.820          | 5.174          |
| Jam3    | -1.792      | Ccl7      | 12.622      | Rhoc      | 4.626          | 4.705          |
|         |             | Msr1      | 12.445      | Mmp14     | 4.608          | 5.418          |
|         |             | Cd24a     | 11.770      | Ccl9      | 4.518          | 5.177          |
|         |             | Csf2rb    | 11.085      | Tgm2      | 4.504          | 4.795          |

|         |        |          |       |       |
|---------|--------|----------|-------|-------|
| Runx1   | 10.581 | Emilin1  | 4.265 | 4.364 |
| Gpr35   | 10.420 | Ptprc    | 4.103 | 4.334 |
| Ccr1    | 9.871  | Litaf    | 4.072 | 3.362 |
| Racgap1 | 9.775  | Vim      | 4.049 | 3.986 |
| Ect2    | 9.516  | Fcgr3    | 3.993 | 3.074 |
| Havcr2  | 9.472  | Soat1    | 3.896 | 3.758 |
| Lat2    | 9.451  | Ldlr     | 3.813 | 4.756 |
| Itgb2   | 9.094  | Preli1   | 3.718 | 3.329 |
| Cd180   | 9.072  | Trim16   | 3.681 | 4.547 |
| Prc1    | 8.639  | Rnf19b   | 3.642 | 4.003 |
| Kif23   | 8.412  | Tuba1b   | 3.497 | 3.072 |
| Dok1    | 8.142  | Adamts12 | 3.453 | 3.580 |
| Pik3ap1 | 8.033  | Lgals1   | 3.446 | 4.017 |
| Kif4    | 7.863  | Plscr1   | 3.381 | 2.523 |
| Ptx3    | 7.589  | Ifi30    | 3.347 | 3.281 |
| Tlr13   | 7.379  | Pla2g7   | 3.332 | 4.630 |
| Myo1g   | 7.226  | Sfrp1    | 3.307 | 3.030 |
| Ptgs2   | 7.153  | Otulin   | 3.303 | 2.893 |
| Kif20a  | 7.039  | G6pdx    | 3.290 | 3.119 |
| C5ar1   | 7.009  | Osmr     | 3.278 | 3.525 |
| Sele    | 6.769  | Ifi204   | 3.274 | 2.803 |
| Pdpm    | 6.605  | Tgfb3    | 3.271 | 2.029 |
| Sphk1   | 6.439  | Klhl6    | 3.194 | 2.011 |
| Pirb    | 6.345  | Gba      | 3.173 | 2.411 |
| Nlrc3   | 6.282  | Masp1    | 3.107 | 2.701 |
| C3ar1   | 6.280  | Cfl1     | 3.086 | 3.469 |
| Csf2rb2 | 6.265  | Ppp1r14b | 2.963 | 2.678 |
| Kif14   | 6.185  | Adcy7    | 2.959 | 2.815 |
| Vav1    | 5.911  | Enpp1    | 2.956 | 3.722 |
| Cit     | 5.892  | Ptprf    | 2.946 | 3.562 |
| Kif20b  | 5.861  | Sdc1     | 2.941 | 4.236 |
| Slc11a1 | 5.774  | Anxa1    | 2.922 | 2.855 |
| Cd84    | 5.723  | Shb      | 2.914 | 2.708 |
| Il17ra  | 5.718  | Nme1     | 2.889 | 3.359 |
| Fcer1g  | 5.635  | Zyx      | 2.880 | 2.798 |
| Fcgr1   | 5.594  | Ctps     | 2.861 | 3.016 |
| Tyrobp  | 5.482  | C1qa     | 2.831 | 2.521 |
| Socs3   | 5.425  | Cblb     | 2.830 | 2.564 |
| Pf4     | 5.217  | Adgre1   | 2.830 | 3.153 |
| Siglec1 | 4.901  | Bcr      | 2.803 | 2.980 |

|           |       |          |       |       |
|-----------|-------|----------|-------|-------|
| Clec5a    | 4.882 | Nppa     | 2.800 | 4.948 |
| Myo1f     | 4.761 | Prkcd    | 2.795 | 2.078 |
| Ccr5      | 4.734 | Apbb1ip  | 2.779 | 4.058 |
| Cd14      | 4.651 | Adam9    | 2.775 | 2.992 |
| Panx1     | 4.538 | Rpl3     | 2.761 | 2.997 |
| Ncf1      | 4.390 | Arid5a   | 2.752 | 2.228 |
| Hells     | 4.317 | Bak1     | 2.750 | 3.150 |
| Alox5ap   | 4.293 | Unc93b1  | 2.747 | 2.081 |
| E2f8      | 4.272 | C1qb     | 2.736 | 3.385 |
| Fcgr2b    | 4.140 | Myh9     | 2.705 | 2.344 |
| Ptpn      | 4.104 | C1qc     | 2.665 | 2.601 |
| Nckap1l   | 4.056 | Sox9     | 2.653 | 2.948 |
| Il33      | 4.052 | Mrc1     | 2.649 | 2.420 |
| Dock2     | 4.017 | Ctla2a   | 2.635 | 2.344 |
| Clec12a   | 3.989 | Dab2     | 2.596 | 2.801 |
| Nusap1    | 3.957 | Syk      | 2.586 | 3.022 |
| Coro1a    | 3.957 | Gpx1     | 2.585 | 2.557 |
| Ly86      | 3.942 | Ptgis    | 2.577 | 2.278 |
| Itgb3     | 3.912 | Cd248    | 2.557 | 2.515 |
| Fermt3    | 3.897 | P4hb     | 2.540 | 2.835 |
| Ripk3     | 3.867 | Actg1    | 2.531 | 2.528 |
| Blk       | 3.841 | Nt5e     | 2.521 | 1.947 |
| Ptpn6     | 3.746 | Anxa4    | 2.517 | 2.602 |
| Gpnmb     | 3.711 | Creb3    | 2.514 | 2.240 |
| Thy1      | 3.651 | Stab1    | 2.502 | 2.184 |
| Nfam1     | 3.632 | Serpinf1 | 2.488 | 2.428 |
| Cfp       | 3.626 | Iqgap1   | 2.488 | 2.517 |
| Tlr2      | 3.624 | Cdkn1a   | 2.459 | 2.314 |
| Hist1h2bg | 3.605 | Lgmn     | 2.442 | 2.530 |
| Egr3      | 3.598 | Rras     | 2.397 | 2.153 |
| Incenp    | 3.347 | Myo1c    | 2.360 | 2.894 |
| Ada       | 3.300 | Sdc4     | 2.343 | 2.329 |
| Met       | 3.273 | Ptk2b    | 2.311 | 2.958 |
| Nfkbiz    | 3.249 | Vcam1    | 2.304 | 2.086 |
| Pik3cg    | 3.245 | Plk2     | 2.294 | 2.215 |
| Spi1      | 3.141 | Bcar1    | 2.279 | 1.778 |
| Numbl     | 3.043 | Hcls1    | 2.274 | 2.609 |
| Lcp2      | 3.022 | Itga4    | 2.244 | 2.883 |
| Blm       | 2.997 | Itgb1    | 2.223 | 2.307 |
| Sept5     | 2.991 | Tnfrsf1a | 2.209 | 2.301 |

|           |       |          |       |       |
|-----------|-------|----------|-------|-------|
| Casp3     | 2.931 | Sept11   | 2.201 | 1.849 |
| Ikzf1     | 2.902 | Plcg2    | 2.198 | 1.956 |
| Cx3cr1    | 2.848 | Fkbp1a   | 2.197 | 2.456 |
| Dhx58     | 2.843 | Trp53    | 2.166 | 2.165 |
| Alcam     | 2.796 | Cspg4    | 2.148 | 2.136 |
| Pla2g4a   | 2.787 | Hsp90aa1 | 2.144 | 2.216 |
| Tmem173   | 2.787 | Tlr4     | 2.125 | 2.071 |
| Src       | 2.752 | Hmgb2    | 2.122 | 2.469 |
| Cd300ld   | 2.739 | Csf1r    | 2.121 | 1.942 |
| Cdc25b    | 2.733 | Ptms     | 2.120 | 2.073 |
| Chst3     | 2.732 | Emp2     | 2.111 | 2.255 |
| Themis2   | 2.703 | Hif1a    | 2.108 | 2.022 |
| Bcl3      | 2.694 | Lsp1     | 2.106 | 2.371 |
| Tnfrsf11a | 2.666 | Ptprj    | 2.104 | 1.777 |
| Arrb2     | 2.484 | Cybb     | 2.100 | 2.584 |
| Robo1     | 2.443 | Dlg5     | 2.072 | 2.097 |
| D1Ert622e | 2.416 | Tnfrsf1b | 2.067 | 2.151 |
| Lxn       | 2.378 | Ddx21    | 2.036 | 1.879 |
| Rab7b     | 2.371 | Cd151    | 2.033 | 2.030 |
| Cmtm3     | 2.353 | Skap2    | 2.026 | 3.448 |
| Pik3cd    | 2.349 | Lrrc32   | 2.022 | 1.833 |
| Irf8      | 2.246 | Gprc5b   | 2.020 | 1.770 |
| Hist1h2be | 2.212 | Capn2    | 2.015 | 2.061 |
| Mapk11    | 2.199 | Nras     | 2.013 | 2.256 |
| Prkcb     | 2.113 | Arf6     | 2.001 | 2.160 |
| Cfb       | 2.075 | Il1r1    | 1.999 | 1.782 |
| Bax       | 2.038 | Ltbr     | 1.963 | 2.180 |
| Hax1      | 2.033 | Dysf     | 1.936 | 2.127 |
| Gcnt1     | 2.029 | Myo9b    | 1.935 | 1.994 |
| Relb      | 2.022 | Xbp1     | 1.935 | 1.979 |
| Polr3g    | 2.014 | Lrp1     | 1.916 | 1.889 |
| Myd88     | 2.010 | F2r      | 1.915 | 2.004 |
| Csf2ra    | 2.002 | Cxcl16   | 1.906 | 2.152 |
| Susd2     | 1.987 | Inpp5d   | 1.903 | 2.647 |
| Ecm1      | 1.966 | Nfil3    | 1.880 | 2.121 |
| Mapk7     | 1.950 | Mcm2     | 1.862 | 2.489 |
| Atad5     | 1.912 | Hk1      | 1.858 | 2.066 |
| Casp8     | 1.881 | Hyal2    | 1.853 | 1.806 |
| Nfkb2     | 1.866 | Axl      | 1.849 | 2.011 |
| Stambp    | 1.834 | Actr3    | 1.840 | 2.003 |



|         |        |          |        |        |
|---------|--------|----------|--------|--------|
| Bad     | 1.833  | Calr     | 1.837  | 1.886  |
| Stat3   | 1.817  | Dapk3    | 1.833  | 1.719  |
| Ctsc    | 1.815  | Itgav    | 1.831  | 1.859  |
| Rps6ka4 | 1.808  | Tgfb1    | 1.830  | 1.963  |
| Atic    | 1.804  | Slc7a2   | 1.803  | 2.109  |
| Rpl39   | 1.787  | Csk      | 1.803  | 1.709  |
| Noc2l   | 1.786  | Chmp4b   | 1.803  | 1.785  |
| Nup62   | 1.780  | Cdk6     | 1.801  | 1.781  |
| Dhx33   | 1.773  | B4galt1  | 1.792  | 2.046  |
| Apobec3 | 1.765  | Prnp     | 1.777  | 1.799  |
| Map2k3  | 1.763  | Tmem176b | 1.774  | 2.331  |
| Arhgef5 | 1.746  | Dbnl     | 1.754  | 2.002  |
| Adam15  | 1.726  | Rara     | 1.750  | 1.728  |
| Cidea   | 1.723  | Ddost    | 1.744  | 1.901  |
| Ptpn2   | 1.707  | Gli3     | 1.738  | 2.298  |
| Impdh2  | 1.703  | Rpl13a   | 1.722  | 1.813  |
| Zbtb7b  | 1.700  | Pmp22    | 1.714  | 1.736  |
| Parp14  | -1.705 | Fam49b   | 1.712  | 1.800  |
| Slc39a3 | -1.706 | Pvr      | 1.708  | 1.864  |
| Rarg    | -1.731 | Btnl9    | -1.701 | -2.683 |
| Flt1    | -1.746 | Gpam     | -1.714 | -2.049 |
| Gstp1   | -1.766 | Mavs     | -1.722 | -1.791 |
| Rora    | -1.767 | Lpl      | -1.737 | -2.346 |
| Alox5   | -1.779 | Rab12    | -1.760 | -1.747 |
| Flcn    | -1.783 | Optn     | -1.760 | -2.252 |
| Klf2    | -1.791 | Bcl2l11  | -1.769 | -2.251 |
| H2-Q4   | -1.807 | Phlpp1   | -1.779 | -1.766 |
| Itpkb   | -1.808 | Msh2     | -1.794 | -1.867 |
| Tek     | -1.816 | Siae     | -1.799 | -1.804 |
| Mr1     | -1.834 | Jun      | -1.810 | -1.759 |
| Cfh     | -1.879 | Gbp5     | -1.815 | -2.163 |
| Rapgef2 | -1.888 | Pdcd4    | -1.823 | -1.795 |
| Kif16b  | -1.898 | Prox1    | -1.826 | -2.173 |
| Pde5a   | -1.902 | Irgm2    | -1.828 | -2.669 |
| Irf2bp2 | -1.925 | Il10rb   | -1.831 | -2.017 |
| Cd300lg | -1.928 | Ephx2    | -1.832 | -1.951 |
| Gbp3    | -1.938 | Tnfaip8  | -1.856 | -2.613 |
| Il15ra  | -1.954 | Wfdc1    | -1.862 | -2.771 |
| Kdm5d   | -1.958 | Agtr1a   | -1.868 | -1.727 |
| Rarres2 | -1.969 | Map4k2   | -1.872 | -2.778 |

|          |        |         |        |        |
|----------|--------|---------|--------|--------|
| Prkd1    | -1.973 | Rgcc    | -1.878 | -2.006 |
| Dll4     | -1.979 | Klhl21  | -1.884 | -1.824 |
| Tmem204  | -1.980 | Itgb6   | -1.918 | -2.285 |
| Tspan2   | -1.987 | Trpm4   | -1.936 | -1.708 |
| Zbtb16   | -1.991 | Tgfbr3  | -1.947 | -1.725 |
| Kat8     | -1.993 | Igf2    | -1.950 | -1.939 |
| C1s1     | -2.009 | Alad    | -1.970 | -2.073 |
| Map3k5   | -2.062 | Gbp4    | -1.984 | -2.377 |
| Gbp9     | -2.071 | Gbp7    | -1.997 | -2.989 |
| Pdgfd    | -2.100 | Ahr     | -2.000 | -2.165 |
| Kdr      | -2.126 | Crhr2   | -2.026 | -1.926 |
| Irf1     | -2.133 | Lifr    | -2.033 | -2.257 |
| Zc3h8    | -2.141 | Stat5b  | -2.034 | -1.833 |
| Sept4    | -2.144 | Mylk3   | -2.041 | -2.546 |
| Bmp6     | -2.148 | Vtn     | -2.045 | -3.620 |
| Abcd2    | -2.278 | Igtp    | -2.048 | -1.735 |
| Klhl13   | -2.282 | Timp4   | -2.087 | -2.694 |
| Egr1     | -2.284 | Ccbe1   | -2.092 | -2.587 |
| Adgrf5   | -2.285 | F3      | -2.209 | -2.642 |
| Ackr3    | -2.301 | Iigp1   | -2.287 | -2.244 |
| Fzd8     | -2.320 | Cd200   | -2.288 | -2.106 |
| Tnfsf10  | -2.362 | Ddt     | -2.305 | -2.024 |
| Tnfrsf21 | -2.496 | Pik3r1  | -2.401 | -2.446 |
| Ccr12    | -2.506 | Gbp6    | -2.453 | -4.015 |
| Slc26a6  | -2.548 | Adamts7 | -2.457 | -2.723 |
| Prdm1    | -2.648 | Pde4d   | -2.497 | -2.374 |
| Dll1     | -2.711 | Nr1d2   | -2.518 | -2.834 |
| Wnt5a    | -2.734 | Cd274   | -2.549 | -3.672 |
| Gata2    | -2.748 | Ppara   | -2.614 | -2.691 |
| Cd28     | -2.776 | Dusp1   | -2.695 | -3.057 |
| Ceacam1  | -2.786 | Gsn     | -2.718 | -3.531 |
| Colec11  | -2.848 | Lpin1   | -2.759 | -2.924 |
| P2ry14   | -2.855 | Mif1    | -2.995 | -3.053 |
| Enpp2    | -3.196 | Efnb3   | -4.012 | -3.701 |
| Rps6ka5  | -3.390 | Angpt1  | -4.454 | -4.113 |
| Cxcl9    | -3.448 |         |        |        |
| Gzmm     | -3.537 |         |        |        |
| Tgtp2    | -3.550 |         |        |        |
| Aqp4     | -3.555 |         |        |        |
| Prkcq    | -3.793 |         |        |        |

|               |         |
|---------------|---------|
| Dpp4          | -3.837  |
| F830016B08Rik | -3.931  |
| Gbp10         | -4.311  |
| Tgtp1         | -5.041  |
| Mme           | -5.251  |
| Ptgfr         | -5.664  |
| Cdkn1c        | -5.729  |
| Pla2g5        | -5.822  |
| Il15          | -5.997  |
| Cyp26b1       | -23.267 |

**Supplementary Table 7. Oxidation-Reduction Genes**  
GO Terms: Oxidation-Reduction

| Genes Unique to<br>FFAR4 KO Sham<br>vs FFAR4 KO<br>TAC:<br>5 increased,<br>8 decreased |                | Genes Unique to<br>WT Sham vs<br>WT TAC:<br>25 increased,<br>38 decreased |                | Genes Shared by<br>FFAR4 KO Sham vs<br>FFAR4 KO TAC<br>and WT Sham vs WT TAC:<br>34 increased, 58 decreased |                      |                      |
|----------------------------------------------------------------------------------------|----------------|---------------------------------------------------------------------------|----------------|-------------------------------------------------------------------------------------------------------------|----------------------|----------------------|
| Gene ID                                                                                | Fold<br>Change | Gene ID                                                                   | Fold<br>Change | Gene ID                                                                                                     | Fold<br>Change<br>KO | Fold<br>Change<br>WT |
| Cyba                                                                                   | 2.019          | P4ha3                                                                     | 101.497        | Lox                                                                                                         | 24.312               | 34.324               |
| Me2                                                                                    | 1.948          | Aldh1a2                                                                   | 26.354         | Loxl3                                                                                                       | 8.357                | 14.007               |
| Ero1l                                                                                  | 1.889          | Hmox1                                                                     | 24.043         | Loxl2                                                                                                       | 7.354                | 7.545                |
| Nqo1                                                                                   | 1.799          | Kcnab2                                                                    | 9.746          | Qsox1                                                                                                       | 4.180                | 4.329                |
| Pxdn                                                                                   | 1.723          | Loxl4                                                                     | 9.535          | Srxn1                                                                                                       | 3.987                | 4.193                |
| Ndufc2                                                                                 | -1.708         | Steap2                                                                    | 8.543          | Loxl1                                                                                                       | 3.785                | 3.452                |
| Aldh1b1                                                                                | -1.729         | Ptgs2                                                                     | 7.153          | Ifi30                                                                                                       | 3.347                | 3.281                |
| Cyp4b1                                                                                 | -1.803         | Mthfd1l                                                                   | 6.998          | G6pdx                                                                                                       | 3.290                | 3.119                |
| Hibadh                                                                                 | -1.816         | Akr1b8                                                                    | 6.829          | Fads3                                                                                                       | 2.738                | 3.250                |
| Cpox                                                                                   | -1.834         | Rrm2                                                                      | 5.633          | Aldh18a1                                                                                                    | 2.617                | 2.458                |
| Cyp2u1                                                                                 | -1.855         | Tbxas1                                                                    | 4.509          | Gpx1                                                                                                        | 2.585                | 2.557                |
| Scd1                                                                                   | -1.872         | Gpx7                                                                      | 3.552          | Ptgis                                                                                                       | 2.577                | 2.278                |
| Oxnad1                                                                                 | -2.146         | Mthfd2                                                                    | 3.175          | Mical2                                                                                                      | 2.544                | 2.742                |
|                                                                                        |                | Dhcr24                                                                    | 3.043          | Txnrd1                                                                                                      | 2.544                | 2.756                |
|                                                                                        |                | Frrs1                                                                     | 2.982          | Plod3                                                                                                       | 2.509                | 2.553                |
|                                                                                        |                | Sqle                                                                      | 2.946          | P3h1                                                                                                        | 2.506                | 2.958                |
|                                                                                        |                | Rdh11                                                                     | 2.879          | Vat1                                                                                                        | 2.370                | 3.094                |
|                                                                                        |                | Msmo1                                                                     | 2.459          | Pgd                                                                                                         | 2.293                | 2.786                |
|                                                                                        |                | Pycr2                                                                     | 2.241          | Cyb561                                                                                                      | 2.241                | 1.753                |
|                                                                                        |                | Cyb561a3                                                                  | 2.088          | Mical1                                                                                                      | 2.222                | 2.817                |
|                                                                                        |                | Gpx3                                                                      | 2.069          | Ugdh                                                                                                        | 2.200                | 2.476                |
|                                                                                        |                | Sod3                                                                      | 1.974          | Cyb5r3                                                                                                      | 2.137                | 2.432                |
|                                                                                        |                | Sardh                                                                     | 1.934          | Cybb                                                                                                        | 2.100                | 2.584                |
|                                                                                        |                | Cbr2                                                                      | 1.894          | Por                                                                                                         | 2.086                | 2.004                |
|                                                                                        |                | Impdh2                                                                    | 1.703          | Hsd17b12                                                                                                    | 2.070                | 3.062                |
|                                                                                        |                | Decr1                                                                     | -1.703         | P3h3                                                                                                        | 2.044                | 2.019                |
|                                                                                        |                | Ndufa9                                                                    | -1.710         | Hmgcr                                                                                                       | 1.955                | 1.999                |

|         |         |               |        |        |
|---------|---------|---------------|--------|--------|
| Uqcrc2  | -1.713  | Tyw1          | 1.919  | 2.191  |
| Aldh2   | -1.721  | Mthfr         | 1.906  | 1.858  |
| Pdpr    | -1.727  | Fads1         | 1.812  | 1.754  |
| Ndufb10 | -1.730  | Cyb5r1        | 1.789  | 2.294  |
| Acadsb  | -1.735  | Txn1          | 1.763  | 2.159  |
| Ndufs3  | -1.741  | Cyp20a1       | 1.749  | 1.781  |
| Cyp27a1 | -1.751  | Rrm1          | 1.749  | 2.313  |
| Ndufb2  | -1.756  | Ndufa5        | -1.724 | -1.806 |
| Acadvl  | -1.760  | Xdh           | -1.731 | -1.825 |
| Idh3g   | -1.776  | Tecrl         | -1.746 | -1.709 |
| Alox5   | -1.779  | Hadha         | -1.757 | -2.090 |
| Cbr4    | -1.783  | Phyh          | -1.774 | -1.885 |
| Me3     | -1.783  | L2hgdh        | -1.779 | -2.155 |
| Ndufs7  | -1.791  | Etfb          | -1.791 | -1.949 |
| Sdhd    | -1.820  | Sdha          | -1.798 | -2.039 |
| Dhrs11  | -1.843  | Dld           | -1.817 | -2.102 |
| Dhrs4   | -1.860  | Ndufs8        | -1.836 | -1.900 |
| Ogdh    | -1.870  | Aldh5a1       | -1.853 | -2.780 |
| Acads   | -1.875  | Mdh1          | -1.854 | -1.866 |
| Ptgr2   | -1.876  | Sod2          | -1.863 | -2.121 |
| Ndufb9  | -1.879  | Dhrs7         | -1.878 | -2.120 |
| Pdha1   | -1.887  | Ivd           | -1.885 | -2.559 |
| Ndufs2  | -1.893  | Ndufs4        | -1.885 | -2.218 |
| Alkbh7  | -1.918  | Sdr39u1       | -1.903 | -1.854 |
| Kdm5d   | -1.958  | Hsd12         | -1.907 | -2.324 |
| Fmo2    | -1.972  | Rtn4ip1       | -1.915 | -1.720 |
| Bckdha  | -2.123  | Ldhd          | -1.915 | -2.858 |
| Rrm2b   | -2.142  | Etfhd         | -1.923 | -2.156 |
| Hadhb   | -2.290  | Pdhd          | -1.930 | -1.888 |
| Akr1c14 | -2.631  | Aaed1         | -1.933 | -2.274 |
| Adh1    | -2.687  | Akr7a5        | -1.935 | -2.387 |
| Sord    | -2.704  | Ndufs1        | -1.943 | -2.387 |
| Cyb5rl  | -3.342  | Idh2          | -1.945 | -2.544 |
| Tet1    | -3.817  | Fmo5          | -1.948 | -2.579 |
| Cyb5r2  | -4.230  | Ldhd          | -1.951 | -2.318 |
| Cyp26b1 | -23.267 | C330018D20Rik | -1.967 | -2.099 |
|         |         | Rdh14         | -1.976 | -2.129 |
|         |         | Retsat        | -1.995 | -2.013 |
|         |         | Nnt           | -2.000 | -2.393 |
|         |         | Adi1          | -2.046 | -1.921 |

|          |        |        |
|----------|--------|--------|
| Etfa     | -2.081 | -2.236 |
| Kdm1b    | -2.087 | -1.961 |
| Dhrs3    | -2.123 | -2.663 |
| Fmo1     | -2.138 | -2.131 |
| Bckdhb   | -2.142 | -2.406 |
| Gcdh     | -2.145 | -2.427 |
| Acadm    | -2.161 | -2.786 |
| Sesn1    | -2.162 | -3.090 |
| Ddo      | -2.185 | -2.191 |
| Nqo2     | -2.199 | -2.352 |
| Dpyd     | -2.238 | -2.337 |
| Egln1    | -2.240 | -2.352 |
| Msrb2    | -2.267 | -2.275 |
| Fam213a  | -2.302 | -3.059 |
| Aldh6a1  | -2.323 | -3.012 |
| Hadh     | -2.364 | -2.757 |
| Dhdh     | -2.382 | -2.864 |
| Aldh4a1  | -2.434 | -3.223 |
| D2hgdh   | -2.435 | -3.526 |
| Acad11   | -2.509 | -2.647 |
| Adhfe1   | -2.676 | -2.376 |
| Tecr     | -2.723 | -2.728 |
| Maob     | -2.808 | -3.146 |
| Selenbp1 | -2.935 | -3.139 |
| Dhrs7c   | -4.965 | -7.365 |

### Supplemental Table 8. Contractile Function Genes

GO Terms: Heart contraction, cardiac muscle cell contraction, sarcomere, heart rate, ryanodine, sarcoplasmic reticulum, cardiac muscle cell action potential involved in contraction, cardiac contraction

| Genes Unique to<br>FFAR4 KO Sham vs<br>FFAR4 KO TAC:<br>2 increased,<br>2 decreased |                | Genes Unique to<br>WT Sham vs<br>WT TAC:<br>10 increased,<br>15 decreased |                | Genes Shared by<br>FFAR4 KO Sham vs<br>FFAR4 KO TAC<br>and WT Sham vs WT TAC:<br>20 increased, 31 decreased |                      |                      |
|-------------------------------------------------------------------------------------|----------------|---------------------------------------------------------------------------|----------------|-------------------------------------------------------------------------------------------------------------|----------------------|----------------------|
| Gene ID                                                                             | Fold<br>Change | Gene ID                                                                   | Fold<br>Change | Gene ID                                                                                                     | Fold<br>Change<br>KO | Fold<br>Change<br>WT |
| Myh7                                                                                | 2.484          | Tnnt3                                                                     | 6.630          | Hbegf                                                                                                       | 12.860               | 11.692               |
| Ace                                                                                 | 1.732          | Ccr5                                                                      | 4.734          | Tgfb2                                                                                                       | 8.828                | 10.745               |
| Kcnj5                                                                               | -1.897         | Ada                                                                       | 3.300          | Synpo2l                                                                                                     | 5.543                | 4.979                |
| Bmp10                                                                               | -8.321         | Met                                                                       | 3.273          | Xirp1                                                                                                       | 3.534                | 3.189                |
|                                                                                     |                | Kcne4                                                                     | 2.899          | Ankrd23                                                                                                     | 3.449                | 2.536                |
|                                                                                     |                | Atp1b1                                                                    | 1.927          | Cav3                                                                                                        | 3.100                | 3.035                |
|                                                                                     |                | Pkp2                                                                      | 1.886          | Klhl41                                                                                                      | 3.026                | 2.837                |
|                                                                                     |                | Ppp1r13l                                                                  | 1.799          | Nppa                                                                                                        | 2.800                | 4.948                |
|                                                                                     |                | Map2k3                                                                    | 1.763          | Gpx1                                                                                                        | 2.585                | 2.557                |
|                                                                                     |                | Gnai2                                                                     | 1.739          | Wdr1                                                                                                        | 2.581                | 2.653                |
|                                                                                     |                | Gaa                                                                       | -1.711         | Actg1                                                                                                       | 2.531                | 2.528                |
|                                                                                     |                | Taz                                                                       | -1.722         | Bin1                                                                                                        | 2.452                | 2.310                |
|                                                                                     |                | Ctnna3                                                                    | -1.798         | Itgb1                                                                                                       | 2.223                | 2.307                |
|                                                                                     |                | Myom2                                                                     | -1.843         | Csrp3                                                                                                       | 2.219                | 2.003                |
|                                                                                     |                | Tnni3k                                                                    | -1.889         | Fkbp1a                                                                                                      | 2.197                | 2.456                |
|                                                                                     |                | Pde5a                                                                     | -1.902         | Sri                                                                                                         | 2.008                | 1.881                |
|                                                                                     |                | Hcn4                                                                      | -1.993         | Tmem38b                                                                                                     | 1.900                | 2.004                |
|                                                                                     |                | Six4                                                                      | -1.994         | Gnao1                                                                                                       | 1.861                | 2.401                |
|                                                                                     |                | Epas1                                                                     | -2.109         | Popdc2                                                                                                      | 1.815                | 1.864                |
|                                                                                     |                | Tnnt1                                                                     | -2.132         | Slc8a1                                                                                                      | 1.727                | 1.886                |
|                                                                                     |                | Kcna5                                                                     | -2.157         | Trdn                                                                                                        | -1.740               | -1.799               |
|                                                                                     |                | Map2k6                                                                    | -3.425         | Tmem38a                                                                                                     | -1.815               | -2.108               |
|                                                                                     |                | Cacna2d2                                                                  | -3.520         | Prox1                                                                                                       | -1.826               | -2.173               |
|                                                                                     |                | Sln                                                                       | -6.103         | Tnni3                                                                                                       | -1.927               | -2.143               |
|                                                                                     |                | Scn4b                                                                     | -8.311         | Trpm4                                                                                                       | -1.936               | -1.708               |
|                                                                                     |                |                                                                           |                | Vegfb                                                                                                       | -2.001               | -2.218               |

|         |        |        |
|---------|--------|--------|
| Crhr2   | -2.026 | -1.926 |
| Atp2a2  | -2.035 | -2.385 |
| Thrb    | -2.035 | -2.350 |
| Myh6    | -2.039 | -2.507 |
| Cacna1g | -2.040 | -1.762 |
| Mylk3   | -2.041 | -2.546 |
| Sp4     | -2.043 | -2.230 |
| Myl2    | -2.057 | -2.436 |
| Atp1a2  | -2.207 | -2.710 |
| Ank2    | -2.232 | -2.457 |
| Hopx    | -2.233 | -3.247 |
| Rps6ka2 | -2.251 | -2.898 |
| Pik3r1  | -2.401 | -2.446 |
| Pln     | -2.439 | -2.656 |
| Adra1b  | -2.439 | -2.145 |
| Pde4d   | -2.497 | -2.374 |
| Gstm7   | -2.611 | -2.433 |
| Kcnh2   | -2.618 | -2.107 |
| Tcap    | -2.645 | -2.400 |
| Myl4    | -2.994 | -3.758 |
| Kcnj2   | -3.256 | -3.366 |
| Rgs2    | -3.313 | -3.246 |
| Hrc     | -3.466 | -5.100 |
| Adra1a  | -3.544 | -3.681 |
| Dhrs7c  | -4.965 | -7.365 |



**Supplemental Table 9. Angiogenesis Genes**  
GO Terms: Angiogenesis

Genes Unique to FFAR4  
KO Sham vs FFAR4 KO  
TAC:  
5 increased,  
2 decreased

Genes Unique to  
WT Sham vs  
WT TAC:  
39 increased,  
31 decreased

Genes Shared by  
FFAR4 KO Sham vs  
FFAR4 KO TAC  
and WT Sham vs WT TAC:  
58 increased, 18 decreased

| Gene ID | Fold Change | Gene ID | Fold Change | Gene ID   | Fold Change KO | Fold Change WT |
|---------|-------------|---------|-------------|-----------|----------------|----------------|
| Cx3cl1  | 2.987       | Ereg    | 240.348     | Rtn4      | 17.020         | 17.496         |
| Mfge8   | 1.814       | Adam8   | 117.349     | Serpine1  | 16.010         | 24.941         |
| Adamts9 | 1.760       | Adam12  | 38.177      | Hbegf     | 12.860         | 11.692         |
| Smad1   | 1.757       | Ccl2    | 25.129      | Col8a1    | 9.567          | 9.110          |
| Ace     | 1.732       | Hmox1   | 24.043      | Tgfb2     | 8.828          | 10.745         |
| Hdac9   | -1.759      | Ccr2    | 14.716      | Fn1       | 7.686          | 8.424          |
| Jam3    | -1.792      | Lgals3  | 13.711      | Loxl2     | 7.354          | 7.545          |
|         |             | Runx1   | 10.581      | Itga5     | 6.523          | 7.683          |
|         |             | Angptl4 | 9.421       | Thbs1     | 6.419          | 6.000          |
|         |             | Itgb2   | 9.094       | Tnfrsf12a | 6.239          | 6.057          |
|         |             | Ptgs2   | 7.153       | Anxa2     | 5.166          | 6.442          |
|         |             | C5ar1   | 7.009       | Hspb1     | 4.956          | 5.753          |
|         |             | Pdpn    | 6.605       | Srpx2     | 4.921          | 4.422          |
|         |             | Brca1   | 6.587       | Adamts1   | 4.522          | 4.112          |
|         |             | Sphk1   | 6.439       | Emilin1   | 4.265          | 4.364          |
|         |             | C3ar1   | 6.280       | Creb3l1   | 3.704          | 4.160          |
|         |             | Mmp19   | 5.480       | Sparc     | 3.700          | 3.853          |
|         |             | Pf4     | 5.217       | Otulin    | 3.303          | 2.893          |
|         |             | Bmper   | 4.639       | Col4a1    | 3.301          | 3.032          |
|         |             | E2f8    | 4.272       | Anxa1     | 2.922          | 2.855          |
|         |             | Itgb3   | 3.912       | Shb       | 2.914          | 2.708          |
|         |             | Thy1    | 3.651       | Ddah1     | 2.803          | 3.495          |
|         |             | Egr3    | 3.598       | Col18a1   | 2.799          | 3.149          |
|         |             | Plau    | 3.321       | Col4a2    | 2.797          | 2.674          |
|         |             | Pik3cg  | 3.245       | Myh9      | 2.705          | 2.344          |
|         |             | Cx3cr1  | 2.848       | Syk       | 2.586          | 3.022          |
|         |             | Robo1   | 2.443       | Gpx1      | 2.585          | 2.557          |
|         |             | Prkcb   | 2.113       | Ptgis     | 2.577          | 2.278          |

|         |        |          |        |        |
|---------|--------|----------|--------|--------|
| Cib1    | 2.066  | Stab1    | 2.502  | 2.184  |
| Ecm1    | 1.966  | Serpinf1 | 2.488  | 2.428  |
| Mapk7   | 1.950  | Anxa3    | 2.469  | 2.291  |
| Fgfr1   | 1.934  | Rras     | 2.397  | 2.153  |
| Casp8   | 1.881  | Amot     | 2.347  | 1.769  |
| Kctd10  | 1.863  | Flna     | 2.316  | 2.414  |
| Stat3   | 1.817  | Ptk2b    | 2.311  | 2.958  |
| Hs6st1  | 1.793  | Plk2     | 2.294  | 2.215  |
| Unc5b   | 1.761  | Sulf1    | 2.265  | 2.514  |
| Hgs     | 1.755  | Itgb1    | 2.223  | 2.307  |
| Adam15  | 1.726  | Tnfrsf1a | 2.209  | 2.301  |
| Tie1    | -1.705 | Cspg4    | 2.148  | 2.136  |
| Dcn     | -1.738 | Ecscr    | 2.132  | 2.271  |
| Flt1    | -1.746 | Mcam     | 2.131  | 1.882  |
| Ptprm   | -1.763 | Emp2     | 2.111  | 2.255  |
| Synj2bp | -1.764 | Hif1a    | 2.108  | 2.022  |
| Rora    | -1.767 | Cybb     | 2.100  | 2.584  |
| Flcn    | -1.783 | Rnh1     | 2.067  | 2.098  |
| Klf2    | -1.791 | Parva    | 2.013  | 1.962  |
| Ptprb   | -1.804 | Nras     | 2.013  | 2.256  |
| Foxo4   | -1.804 | Glul     | 1.998  | 1.937  |
| Tek     | -1.816 | Dysf     | 1.936  | 2.127  |
| Cd59a   | -1.832 | Xbp1     | 1.935  | 1.979  |
| Prkd1   | -1.973 | Clic4    | 1.871  | 1.906  |
| Dll4    | -1.979 | Mydgf    | 1.849  | 2.087  |
| Reck    | -2.041 | Itgav    | 1.831  | 1.859  |
| Col4a3  | -2.048 | Tgfr1    | 1.826  | 1.858  |
| Epas1   | -2.109 | Pak4     | 1.804  | 1.918  |
| Kdr     | -2.126 | B4galt1  | 1.792  | 2.046  |
| Plxdc1  | -2.205 | Shc1     | 1.709  | 2.106  |
| Ackr3   | -2.301 | Gtf2i    | -1.754 | -1.711 |
| Fzd8    | -2.320 | Jun      | -1.810 | -1.759 |
| Id1     | -2.367 | Prox1    | -1.826 | -2.173 |
| Smoc2   | -2.392 | Agtr1a   | -1.868 | -1.727 |
| Fgf9    | -2.474 | Rgcc     | -1.878 | -2.006 |
| Dll1    | -2.711 | Ppp1r16b | -1.902 | -2.501 |
| Wnt5a   | -2.734 | Igf2     | -1.950 | -1.939 |
| Gata2   | -2.748 | Vegfb    | -2.001 | -2.218 |
| Ceacam1 | -2.786 | Crhr2    | -2.026 | -1.926 |
| Enpp2   | -3.196 | Ndnf     | -2.038 | -1.973 |

|       |        |        |        |        |
|-------|--------|--------|--------|--------|
| Egf   | -4.469 | Col4a4 | -2.072 | -2.081 |
| Ephb1 | -5.173 | Sema6a | -2.086 | -1.958 |
|       |        | Ccbe1  | -2.092 | -2.587 |
|       |        | F3     | -2.209 | -2.642 |
|       |        | Egln1  | -2.240 | -2.352 |
|       |        | Abcc8  | -2.273 | -2.690 |
|       |        | Aqp1   | -2.678 | -3.200 |
|       |        | Angpt1 | -4.454 | -4.113 |

### Supplemental Table 10. Fibrosis Genes

GO Terms: Collagen, metalloproteinase, extracellular matrix, fibroblast, matrix, fibrosis

| Genes Unique to<br>FFAR4 KO Sham vs<br>FFAR4 KO TAC:<br>10 increased,<br>3 decreased |                | Genes Unique to<br>WT Sham vs<br>WT TAC:<br>43 increased,<br>25 decreased |                | Genes Shared by<br>FFAR4 KO Sham vs<br>FFAR4 KO TAC<br>and WT Sham vs WT TAC:<br>98 increased, 26 decreased |                      |                      |
|--------------------------------------------------------------------------------------|----------------|---------------------------------------------------------------------------|----------------|-------------------------------------------------------------------------------------------------------------|----------------------|----------------------|
| Gene ID                                                                              | Fold<br>Change | Gene ID                                                                   | Fold<br>Change | Gene ID                                                                                                     | Fold<br>Change<br>KO | Fold<br>Change<br>WT |
| Igf1                                                                                 | 2.787          | Ereg                                                                      | 240.348        | Lox                                                                                                         | 24.312               | 34.324               |
| Vwa1                                                                                 | 2.072          | Adam8                                                                     | 117.349        | Serpine1                                                                                                    | 16.010               | 24.941               |
| Ero1l                                                                                | 1.889          | Timp1                                                                     | 112.492        | Postn                                                                                                       | 15.162               | 13.826               |
| Errfi1                                                                               | 1.882          | Arg1                                                                      | 94.628         | Col1a1                                                                                                      | 11.043               | 11.083               |
| Ccdc80                                                                               | 1.882          | Pak3                                                                      | 32.821         | Col12a1                                                                                                     | 10.283               | 11.121               |
| Bcl2                                                                                 | 1.768          | Ccl2                                                                      | 25.129         | Col3a1                                                                                                      | 10.165               | 9.226                |
| Adamts9                                                                              | 1.760          | Col11a1                                                                   | 17.389         | Col5a2                                                                                                      | 9.968                | 9.928                |
| Ruvbl1                                                                               | 1.738          | Ccna2                                                                     | 14.460         | Col8a1                                                                                                      | 9.567                | 9.110                |
| Pxdn                                                                                 | 1.723          | Lgals3                                                                    | 13.711         | Cd44                                                                                                        | 9.335                | 9.640                |
| Lum                                                                                  | 1.722          | Myc                                                                       | 13.703         | Tgfb2                                                                                                       | 8.828                | 10.745               |
| Adamts3                                                                              | -1.755         | Loxl4                                                                     | 9.535          | Loxl3                                                                                                       | 8.357                | 14.007               |
| Dnajc19                                                                              | -1.763         | Itgb2                                                                     | 9.094          | Col1a2                                                                                                      | 8.165                | 7.647                |
| Jam3                                                                                 | -1.792         | Ubash3b                                                                   | 7.652          | Fn1                                                                                                         | 7.686                | 8.424                |
|                                                                                      |                | Ptx3                                                                      | 7.589          | Loxl2                                                                                                       | 7.354                | 7.545                |
|                                                                                      |                | Ptgs2                                                                     | 7.153          | Col5a1                                                                                                      | 6.935                | 6.841                |
|                                                                                      |                | Pdpm                                                                      | 6.605          | Thbs1                                                                                                       | 6.419                | 6.000                |
|                                                                                      |                | Pak1                                                                      | 6.585          | Ctss                                                                                                        | 6.082                | 6.240                |
|                                                                                      |                | Sphk1                                                                     | 6.439          | Fbn1                                                                                                        | 5.625                | 5.364                |
|                                                                                      |                | Nlrc3                                                                     | 6.282          | Anxa2                                                                                                       | 5.166                | 6.442                |
|                                                                                      |                | Il17ra                                                                    | 5.718          | Lcp1                                                                                                        | 5.083                | 6.470                |
|                                                                                      |                | Mmp19                                                                     | 5.480          | Mrc2                                                                                                        | 4.616                | 3.066                |
|                                                                                      |                | Fbn2                                                                      | 5.043          | Mmp14                                                                                                       | 4.608                | 5.418                |
|                                                                                      |                | Tgif1                                                                     | 4.348          | Col16a1                                                                                                     | 4.513                | 3.752                |
|                                                                                      |                | Itgb3                                                                     | 3.912          | Emilin1                                                                                                     | 4.265                | 4.364                |
|                                                                                      |                | Thy1                                                                      | 3.651          | Vim                                                                                                         | 4.049                | 3.986                |
|                                                                                      |                | Egr3                                                                      | 3.598          | Creb3l1                                                                                                     | 3.704                | 4.160                |
|                                                                                      |                | Plau                                                                      | 3.321          | Adamts2                                                                                                     | 3.608                | 3.687                |
|                                                                                      |                | Pik3cg                                                                    | 3.245          | Fbln2                                                                                                       | 3.515                | 3.839                |
|                                                                                      |                | Itga11                                                                    | 3.174          | Tgfb1                                                                                                       | 3.493                | 3.399                |

|           |        |          |       |       |
|-----------|--------|----------|-------|-------|
| Bcl3      | 2.694  | Sh3pxd2b | 3.486 | 3.501 |
| Col27a1   | 2.693  | Adamts12 | 3.453 | 3.580 |
| Pdgfc     | 2.636  | Cd63     | 3.435 | 3.194 |
| Arrb2     | 2.484  | Ifi30    | 3.347 | 3.281 |
| Tram2     | 2.447  | Mmp3     | 3.340 | 2.805 |
| Mmp23     | 2.431  | Sfrp1    | 3.307 | 3.030 |
| D1Ert622e | 2.416  | Col4a1   | 3.301 | 3.032 |
| Cib1      | 2.066  | Tgfb3    | 3.271 | 2.029 |
| Bax       | 2.038  | Col15a1  | 3.191 | 2.929 |
| Fgfr1     | 1.934  | Aebp1    | 3.139 | 3.664 |
| Gpm6b     | 1.905  | Eln      | 2.913 | 2.003 |
| Nfkb2     | 1.866  | Zyx      | 2.880 | 2.798 |
| Sulf2     | 1.768  | Col14a1  | 2.859 | 2.153 |
| Adam15    | 1.726  | Serpinh1 | 2.807 | 2.799 |
| Dpt       | -1.722 | Col5a3   | 2.805 | 2.260 |
| Fzd4      | -1.750 | Col18a1  | 2.799 | 3.149 |
| Gstp1     | -1.766 | Col4a2   | 2.797 | 2.674 |
| Lims1     | -1.767 | Prkcd    | 2.795 | 2.078 |
| Tek       | -1.816 | Fosl2    | 2.782 | 3.120 |
| Cd59a     | -1.832 | Adam9    | 2.775 | 2.992 |
| Gpc1      | -1.893 | Rcn3     | 2.772 | 3.552 |
| Kif16b    | -1.898 | Bak1     | 2.750 | 3.150 |
| Dll4      | -1.979 | Sox9     | 2.653 | 2.948 |
| Abi3bp    | -1.980 | Syk      | 2.586 | 3.022 |
| Reck      | -2.041 | Fscn1    | 2.554 | 1.949 |
| Col4a3    | -2.048 | Plod3    | 2.509 | 2.553 |
| Pdgfd     | -2.100 | P3h1     | 2.506 | 2.958 |
| Dand5     | -2.293 | Iqgap1   | 2.488 | 2.517 |
| Id1       | -2.367 | Cdkn1a   | 2.459 | 2.314 |
| Smoc2     | -2.392 | Mfap4    | 2.445 | 2.813 |
| Fgf9      | -2.474 | Ilk      | 2.436 | 2.613 |
| Has3      | -2.573 | Sdc4     | 2.343 | 2.329 |
| Fuz       | -2.725 | Ddr1     | 2.343 | 3.180 |
| Wnt5a     | -2.734 | Ptk2b    | 2.311 | 2.958 |
| Tcf15     | -2.877 | Vcam1    | 2.304 | 2.086 |
| Enpp2     | -3.196 | Col4a5   | 2.301 | 1.958 |
| Dpp4      | -3.837 | Sulf1    | 2.265 | 2.514 |
| Egf       | -4.469 | Itga4    | 2.244 | 2.883 |
| Fgf12     | -5.785 | Itgb1    | 2.223 | 2.307 |
|           |        | Tnfrsf1a | 2.209 | 2.301 |

|            |        |        |
|------------|--------|--------|
| Olfml2b    | 2.201  | 2.322  |
| Trp53      | 2.166  | 2.165  |
| Rcc2       | 2.146  | 2.043  |
| Vps33b     | 2.137  | 1.953  |
| Emp2       | 2.111  | 2.255  |
| Hif1a      | 2.108  | 2.022  |
| Ptprj      | 2.104  | 1.777  |
| Hsd17b12   | 2.070  | 3.062  |
| Tnfrsf1b   | 2.067  | 2.151  |
| P3h3       | 2.044  | 2.019  |
| Nras       | 2.013  | 2.256  |
| Lamc1      | 2.000  | 1.813  |
| Sgpl1      | 1.982  | 2.148  |
| F2r        | 1.915  | 2.004  |
| Tmem38b    | 1.900  | 2.004  |
| Itgbl1     | 1.869  | 1.986  |
| Hyal2      | 1.853  | 1.806  |
| Actr3      | 1.840  | 2.003  |
| Itgav      | 1.831  | 1.859  |
| Tgfb1      | 1.830  | 1.963  |
| Csgalnact1 | 1.827  | 1.919  |
| Tgfbr1     | 1.826  | 1.858  |
| Cdk6       | 1.801  | 1.781  |
| Colgalt1   | 1.798  | 1.726  |
| B4galt1    | 1.792  | 2.046  |
| Ctsb       | 1.785  | 2.093  |
| Coro1c     | 1.759  | 1.843  |
| Slc8a1     | 1.727  | 1.886  |
| Pmp22      | 1.714  | 1.736  |
| Clasp2     | -1.723 | -1.728 |
| Clasp1     | -1.751 | -2.046 |
| Bcl2l11    | -1.769 | -2.251 |
| Pex6       | -1.773 | -2.500 |
| Jun        | -1.810 | -1.759 |
| Pdcd4      | -1.823 | -1.795 |
| Sod2       | -1.863 | -2.121 |
| Rgcc       | -1.878 | -2.006 |
| Ndufs4     | -1.885 | -2.218 |
| Apbb1      | -1.896 | -1.712 |
| Dach1      | -1.897 | -2.799 |

|        |        |        |
|--------|--------|--------|
| Itgb6  | -1.918 | -2.285 |
| Tnxb   | -1.937 | -3.175 |
| Idh2   | -1.945 | -2.544 |
| Tgfbr3 | -1.947 | -1.725 |
| Ecm2   | -2.033 | -2.536 |
| Ndnf   | -2.038 | -1.973 |
| Vtn    | -2.045 | -3.620 |
| Col4a4 | -2.072 | -2.081 |
| Fbln1  | -2.080 | -2.386 |
| Mmp15  | -2.237 | -2.565 |
| Cd200  | -2.288 | -2.106 |
| Pik3r1 | -2.401 | -2.446 |
| Timm21 | -2.440 | -1.991 |
| Egflam | -2.554 | -2.092 |
| Aqp1   | -2.678 | -3.200 |

**Supplemental Table 11. GPR Genes**  
GO Terms: G-protein

| Genes Unique to FFAR4<br>KO Sham vs FFAR4 KO<br>TAC:<br>4 increased,<br>0 decreased |                | Genes Unique to<br>WT Sham vs<br>WT TAC:<br>23 increased,<br>27 decreased |                | Genes Shared by<br>FFAR4 KO Sham vs<br>FFAR4 KO TAC<br>and WT Sham vs WT TAC:<br>19 increased, 17 decreased |                      |                      |
|-------------------------------------------------------------------------------------|----------------|---------------------------------------------------------------------------|----------------|-------------------------------------------------------------------------------------------------------------|----------------------|----------------------|
| Gene ID                                                                             | Fold<br>Change | Gene ID                                                                   | Fold<br>Change | Gene ID                                                                                                     | Fold<br>Change<br>KO | Fold<br>Change<br>WT |
| Cx3cl1                                                                              | 2.987          | Ccl2                                                                      | 25.129         | Ccl6                                                                                                        | 4.955                | 4.562                |
| Adgrd1                                                                              | 2.575          | Cxcr6                                                                     | 18.350         | Ccl9                                                                                                        | 4.518                | 5.177                |
| Akap12                                                                              | 2.225          | Ccr2                                                                      | 14.716         | Tgm2                                                                                                        | 4.504                | 4.795                |
| Prex1                                                                               | 1.716          | Ccl7                                                                      | 12.622         | Adcyap1r1                                                                                                   | 3.613                | 4.621                |
|                                                                                     |                | Gpr35                                                                     | 10.420         | Adcy7                                                                                                       | 2.959                | 2.815                |
|                                                                                     |                | Pik3r5                                                                    | 10.221         | Anxa1                                                                                                       | 2.922                | 2.855                |
|                                                                                     |                | Ccr1                                                                      | 9.871          | Adgre1                                                                                                      | 2.830                | 3.153                |
|                                                                                     |                | C5ar1                                                                     | 7.009          | Syk                                                                                                         | 2.586                | 3.022                |
|                                                                                     |                | Plek                                                                      | 6.558          | Lpar1                                                                                                       | 2.370                | 2.072                |
|                                                                                     |                | C3ar1                                                                     | 6.280          | Bcar1                                                                                                       | 2.279                | 1.778                |
|                                                                                     |                | Vav1                                                                      | 5.911          | Itgb1                                                                                                       | 2.223                | 2.307                |
|                                                                                     |                | Pf4                                                                       | 5.217          | Gprc5b                                                                                                      | 2.020                | 1.770                |
|                                                                                     |                | Ccr5                                                                      | 4.734          | Lrp1                                                                                                        | 1.916                | 1.889                |
|                                                                                     |                | Itgb3                                                                     | 3.912          | F2r                                                                                                         | 1.915                | 2.004                |
|                                                                                     |                | P2ry6                                                                     | 3.282          | Gnao1                                                                                                       | 1.861                | 2.401                |
|                                                                                     |                | Pik3cg                                                                    | 3.245          | Gpr153                                                                                                      | 1.852                | 2.554                |
|                                                                                     |                | S1pr2                                                                     | 3.129          | Grk5                                                                                                        | 1.827                | 2.082                |
|                                                                                     |                | Cx3cr1                                                                    | 2.848          | Usp20                                                                                                       | 1.795                | 2.179                |
|                                                                                     |                | Fzd2                                                                      | 2.615          | Fzd1                                                                                                        | 1.728                | 2.331                |
|                                                                                     |                | Arrb2                                                                     | 2.484          | Sort1                                                                                                       | -1.710               | -1.915               |
|                                                                                     |                | Rgs10                                                                     | 2.307          | Palm                                                                                                        | -1.805               | -1.909               |
|                                                                                     |                | Adgra3                                                                    | 2.035          | Ano1                                                                                                        | -1.849               | -2.281               |
|                                                                                     |                | Gnai2                                                                     | 1.739          | Agtr1a                                                                                                      | -1.868               | -1.727               |
|                                                                                     |                | Adgrl4                                                                    | -1.714         | Gpr157                                                                                                      | -1.896               | -2.042               |
|                                                                                     |                | Mgrn1                                                                     | -1.726         | Lgr6                                                                                                        | -1.908               | -2.249               |
|                                                                                     |                | Gpsm1                                                                     | -1.735         | Grm1                                                                                                        | -1.938               | -2.100               |
|                                                                                     |                | Fzd4                                                                      | -1.750         | Npr3                                                                                                        | -1.957               | -2.357               |
|                                                                                     |                | Rgs3                                                                      | -1.772         | Crhr2                                                                                                       | -2.026               | -1.926               |
|                                                                                     |                | Rapgef2                                                                   | -1.888         | Rgs6                                                                                                        | -2.082               | -1.826               |
|                                                                                     |                | Pde5a                                                                     | -1.902         | Ric8b                                                                                                       | -2.130               | -2.509               |



|         |         |        |        |        |
|---------|---------|--------|--------|--------|
| Gkap1   | -1.945  | Rgs5   | -2.151 | -2.708 |
| Prex2   | -1.984  | Adra1b | -2.439 | -2.145 |
| Dgke    | -2.003  | Rgs2   | -3.313 | -3.246 |
| Adgrf5  | -2.285  | Adra1a | -3.544 | -3.681 |
| Ackr3   | -2.301  | P2ry1  | -4.190 | -5.821 |
| Fzd8    | -2.320  | Gpr22  | -6.708 | -6.137 |
| Kctd12b | -2.449  |        |        |        |
| Ccrl2   | -2.506  |        |        |        |
| Camk2b  | -2.688  |        |        |        |
| Wnt5a   | -2.734  |        |        |        |
| P2ry14  | -2.855  |        |        |        |
| Rgs17   | -3.355  |        |        |        |
| Adcy1   | -3.363  |        |        |        |
| Celsr2  | -3.647  |        |        |        |
| Rgs7bp  | -3.920  |        |        |        |
| Akap5   | -4.109  |        |        |        |
| Gnb3    | -5.439  |        |        |        |
| Ptgfr   | -5.664  |        |        |        |
| Mrgprh  | -7.156  |        |        |        |
| Celsr3  | -17.699 |        |        |        |

### Supplemental Table 12. Fatty Acid Metabolism Genes

GO Terms: Fatty acid

| Genes Unique to FFAR4<br>KO Sham vs FFAR4 KO<br>TAC:<br>0 increased,<br>4 decreased |                | Genes Unique to<br>WT Sham vs<br>WT TAC:<br>11 increased,<br>17 decreased |                | Genes Shared by<br>FFAR4 KO Sham vs<br>FFAR4 KO TAC<br>and WT Sham vs WT TAC:<br>15 increased, 40 decreased |                      |                      |
|-------------------------------------------------------------------------------------|----------------|---------------------------------------------------------------------------|----------------|-------------------------------------------------------------------------------------------------------------|----------------------|----------------------|
| Gene ID                                                                             | Fold<br>Change | Gene ID                                                                   | Fold<br>Change | Gene ID                                                                                                     | Fold<br>Change<br>KO | Fold<br>Change<br>WT |
| Prkab2                                                                              | 1.747          | Ptgs2                                                                     | 7.153          | Thbs1                                                                                                       | 6.419                | 6.000                |
| Mlxipl                                                                              | -1.737         | Brca1                                                                     | 6.587          | Ldlr                                                                                                        | 3.813                | 4.756                |
| Aig1                                                                                | -1.869         | Tbxas1                                                                    | 4.509          | Myo5a                                                                                                       | 3.745                | 2.816                |
| Scd1                                                                                | -1.872         | Aacs                                                                      | 3.760          | Ankrd23                                                                                                     | 3.449                | 2.536                |
|                                                                                     |                | Tlr2                                                                      | 3.624          | Fads3                                                                                                       | 2.738                | 3.250                |
|                                                                                     |                | Hpgds                                                                     | 3.154          | Ptgis                                                                                                       | 2.577                | 2.278                |
|                                                                                     |                | Pdk3                                                                      | 2.571          | Eif6                                                                                                        | 2.466                | 3.325                |
|                                                                                     |                | Hacd4                                                                     | 2.187          | Elovl1                                                                                                      | 2.273                | 2.978                |
|                                                                                     |                | Acsl4                                                                     | 2.043          | Nucb2                                                                                                       | 2.250                | 2.253                |
|                                                                                     |                | Lpin2                                                                     | 2.023          | Tlr4                                                                                                        | 2.125                | 2.071                |
|                                                                                     |                | Plin2                                                                     | 1.801          | Por                                                                                                         | 2.086                | 2.004                |
|                                                                                     |                | Decr1                                                                     | -1.703         | Abcc1                                                                                                       | 2.004                | 1.837                |
|                                                                                     |                | Asah2                                                                     | -1.724         | Sgpl1                                                                                                       | 1.982                | 2.148                |
|                                                                                     |                | Acadsb                                                                    | -1.735         | Xbp1                                                                                                        | 1.935                | 1.979                |
|                                                                                     |                | Echdc2                                                                    | -1.741         | Fads1                                                                                                       | 1.812                | 1.754                |
|                                                                                     |                | Irs1                                                                      | -1.748         | Gpam                                                                                                        | -1.714               | -2.049               |
|                                                                                     |                | Acadvl                                                                    | -1.760         | Lpl                                                                                                         | -1.737               | -2.346               |
|                                                                                     |                | Cbr4                                                                      | -1.783         | Lipe                                                                                                        | -1.738               | -1.839               |
|                                                                                     |                | Echs1                                                                     | -1.816         | Abcd3                                                                                                       | -1.744               | -1.814               |
|                                                                                     |                | Akt2                                                                      | -1.847         | Tecrl                                                                                                       | -1.746               | -1.709               |
|                                                                                     |                | Acads                                                                     | -1.875         | Hadha                                                                                                       | -1.757               | -2.090               |
|                                                                                     |                | Alkbh7                                                                    | -1.918         | Acat1                                                                                                       | -1.762               | -2.006               |
|                                                                                     |                | Hibch                                                                     | -2.002         | Acot11                                                                                                      | -1.764               | -1.847               |
|                                                                                     |                | Pnpla8                                                                    | -2.032         | Acaa2                                                                                                       | -1.772               | -1.909               |
|                                                                                     |                | Abcd2                                                                     | -2.278         | Phyh                                                                                                        | -1.774               | -1.885               |
|                                                                                     |                | Acot1                                                                     | -3.193         | Auh                                                                                                         | -1.775               | -1.982               |
|                                                                                     |                | Ucp3                                                                      | -4.553         | Etfb                                                                                                        | -1.791               | -1.949               |
|                                                                                     |                | Acsm5                                                                     | -5.715         | Aldh5a1                                                                                                     | -1.853               | -2.780               |
|                                                                                     |                |                                                                           |                | Ivd                                                                                                         | -1.885               | -2.559               |

|          |        |        |
|----------|--------|--------|
| Crat     | -1.899 | -2.050 |
| Etfdh    | -1.923 | -2.156 |
| Tnxb     | -1.937 | -3.175 |
| Acot2    | -1.965 | -2.003 |
| Eci1     | -1.981 | -2.429 |
| Cpt2     | -2.030 | -2.238 |
| Etfa     | -2.081 | -2.236 |
| Hadhb    | -2.095 | -2.290 |
| Gcdh     | -2.145 | -2.427 |
| Acadm    | -2.161 | -2.786 |
| Ech1     | -2.223 | -2.511 |
| Acacb    | -2.284 | -2.644 |
| Hadh     | -2.364 | -2.757 |
| Plin5    | -2.386 | -2.429 |
| Mlycd    | -2.415 | -2.520 |
| Ptgds    | -2.433 | -3.263 |
| Acad11   | -2.509 | -2.647 |
| Ppargc1a | -2.536 | -3.388 |
| C1qtnf9  | -2.573 | -3.581 |
| Ppara    | -2.614 | -2.691 |
| Acsl1    | -2.638 | -3.018 |
| Tecr     | -2.723 | -2.728 |
| Acsl6    | -2.754 | -3.114 |
| Lpin1    | -2.759 | -2.924 |
| Dgat2    | -2.763 | -2.645 |
| Ces1d    | -6.513 | -9.549 |

### Supplemental Table 13. Hypertrophy Genes

GO Terms: Hypertrophy, cell growth involved in cardiac muscle cell

| Genes Unique to<br>FFAR4 KO Sham vs<br>FFAR4 KO TAC:<br>4 increased,<br>3 decreased |                | Genes Unique to<br>WT Sham vs<br>WT TAC:<br>1 increased,<br>2 decreased |                | Genes Shared by<br>FFAR4 KO Sham vs<br>FFAR4 KO TAC<br>and WT Sham vs WT TAC:<br>16 increased, 10 decreased |                      |                      |
|-------------------------------------------------------------------------------------|----------------|-------------------------------------------------------------------------|----------------|-------------------------------------------------------------------------------------------------------------|----------------------|----------------------|
| Gene ID                                                                             | Fold<br>Change | Gene ID                                                                 | Fold<br>Change | Gene ID                                                                                                     | Fold<br>Change<br>KO | Fold<br>Change<br>WT |
| Igf1                                                                                | 2.787          | Pak1                                                                    | 6.585          | Nppb                                                                                                        | 8.688                | 5.931                |
| Myh7                                                                                | 2.484          | Pde5a                                                                   | -1.902         | Lmcd1                                                                                                       | 3.848                | 3.012                |
| Cyba                                                                                | 2.019          | Trpc3                                                                   | -2.778         | G6pdx                                                                                                       | 3.290                | 3.119                |
| Errfi1                                                                              | 1.882          |                                                                         |                | Cav3                                                                                                        | 3.100                | 3.035                |
| Ar                                                                                  | -1.853         |                                                                         |                | Col14a1                                                                                                     | 2.859                | 2.153                |
| Adra1b                                                                              | -2.439         |                                                                         |                | Nppa                                                                                                        | 2.800                | 4.948                |
| Bmp10                                                                               | -8.321         |                                                                         |                | Lmna                                                                                                        | 2.742                | 3.030                |
|                                                                                     |                |                                                                         |                | Sorbs2                                                                                                      | 2.727                | 2.767                |
|                                                                                     |                |                                                                         |                | Sox9                                                                                                        | 2.653                | 2.948                |
|                                                                                     |                |                                                                         |                | Mtpn                                                                                                        | 2.397                | 2.763                |
|                                                                                     |                |                                                                         |                | Csrp3                                                                                                       | 2.219                | 2.003                |
|                                                                                     |                |                                                                         |                | Tnfrsf1a                                                                                                    | 2.209                | 2.301                |
|                                                                                     |                |                                                                         |                | Tnfrsf1b                                                                                                    | 2.067                | 2.151                |
|                                                                                     |                |                                                                         |                | Pdlim5                                                                                                      | 2.037                | 2.390                |
|                                                                                     |                |                                                                         |                | Twf1                                                                                                        | 1.876                | 1.737                |
|                                                                                     |                |                                                                         |                | Ctdp1                                                                                                       | 1.718                | 2.013                |
|                                                                                     |                |                                                                         |                | Slc25a4                                                                                                     | -1.709               | -1.835               |
|                                                                                     |                |                                                                         |                | Akap1                                                                                                       | -1.714               | -1.871               |
|                                                                                     |                |                                                                         |                | Atp2a2                                                                                                      | -2.035               | -2.385               |
|                                                                                     |                |                                                                         |                | Myh6                                                                                                        | -2.039               | -2.507               |
|                                                                                     |                |                                                                         |                | Klf15                                                                                                       | -2.116               | -2.747               |
|                                                                                     |                |                                                                         |                | Fbxo32                                                                                                      | -2.129               | -2.753               |
|                                                                                     |                |                                                                         |                | Ppara                                                                                                       | -2.614               | -2.691               |
|                                                                                     |                |                                                                         |                | Tcap                                                                                                        | -2.645               | -2.400               |
|                                                                                     |                |                                                                         |                | Rgs2                                                                                                        | -3.313               | -3.246               |
|                                                                                     |                |                                                                         |                | Adra1a                                                                                                      | -3.544               | -3.681               |

Supplemental Table 14 LC/MS/MS detection and quantitation of oxylipins.

| COMPOUND       | PRECURSOR ION | PRODUCT ION | DWELL TIME (SEC) | RETENTION TIME (MINS) | CONE (V) | CE (EV) | LOD (NM) | LOQ (NM) | INTERNAL STANDARD |
|----------------|---------------|-------------|------------------|-----------------------|----------|---------|----------|----------|-------------------|
| 9-HOTRE        | 293.1         | 171.1       | 0.08             | 6.37                  | 36       | 16      | 0.29     | 0.89     | 9-HODE d4         |
| 9-KODE         | 293.1         | 185.1       | 0.02             | 7.43                  | 34       | 16      | 0.49     | 1.48     | 9-HODE d4         |
| 13-KODE        | 293.1         | 195.1       | 0.02             | 7.29                  | 34       | 16      | 0.39     | 1.18     | 9-HODE d4         |
| 13-HOTRE       | 293.1         | 195.2       | 0.08             | 6.46                  | 36       | 16      | 0.38     | 1.14     | 9-HODE d4         |
| 9-HODE         | 295.1         | 171.1       | 0.02             | 7.07                  | 34       | 14      | 0.14     | 0.43     | 9-HODE d4         |
| 9(10)-EPOME    | 295.1         | 171.1       | 0.03             | 7.99                  | 35       | 14      | 0.27     | 0.81     | 9(10)-EpOME d4    |
| 13-HODE        | 295.1         | 195.1       | 0.03             | 7.03                  | 34       | 14      | 0.10     | 0.31     | 9-HODE d4         |
| 12(13)-EPOME   | 295.1         | 195.1       | 0.03             | 7.93                  | 35       | 14      | 0.16     | 0.48     | 9(10)-EpOME d4    |
| 9-HODE D4      | 299.1         | 172.1       | 0.02             | 7.04                  | 34       | 16      | 0.33     | 0.99     | -                 |
| 9(10)-EPOME D4 | 299.2         | 172.1       | 0.03             | 7.95                  | 35       | 14      | 0.43     | 1.31     | -                 |
| 9(10)-DIHOME   | 313.1         | 201.1       | 0.05             | 5.79                  | 28       | 8       | 2.07     | 6.28     | 9(10)-EpOME d4    |
| 15-KETE        | 317.1         | 113.1       | 0.02             | 7.34                  | 34       | 14      | 0.27     | 0.81     | 12-HETE d8        |
| 5-HEPE         | 317.1         | 115.1       | 0.04             | 6.92                  | 28       | 16      | 0.60     | 1.81     | 12-HETE d8        |
| 11-HEPE        | 317.1         | 121.1       | 0.05             | 6.67                  | 28       | 16      | 0.46     | 1.39     | 12-HETE d8        |
| 8-HEPE         | 317.1         | 127.1       | 0.05             | 6.74                  | 28       | 16      | 0.79     | 2.39     | 12-HETE d8        |
| 9-HEPE         | 317.1         | 149.1       | 0.04             | 6.81                  | 28       | 16      | 0.34     | 1.02     | 12-HETE d8        |
| 12-HEPE        | 317.1         | 179.1       | 0.05             | 6.77                  | 28       | 16      | 0.27     | 0.81     | 12-HETE d8        |
| 5-KETE         | 317.1         | 203.1       | 0.03             | 7.8                   | 34       | 14      | 0.42     | 1.27     | 12-HETE d8        |
| 11(12)-EPETE   | 317.1         | 208.1       | 0.02             | 7.45                  | 32       | 10      | 0.41     | 1.23     | 14,15-EET d11     |
| 15-HEPE        | 317.1         | 219.1       | 0.05             | 6.63                  | 28       | 16      | 0.49     | 1.49     | 12-HETE d8        |
| 17(18)-EPETE   | 317.1         | 259.4       | 0.02             | 7.2                   | 32       | 10      | 1.88     | 5.71     | 14,15-EET d11     |
| 12-KETE        | 317.1         | 273.2       | 0.02             | 7.54                  | 34       | 14      | 0.63     | 1.90     | 12-HETE d8        |
| 8(9)-EPETE     | 317.1         | 299.1       | 0.02             | 7.49                  | 32       | 10      | 1.15     | 3.48     | 14,15-EET d11     |
| 18-HEPE        | 317.2         | 215.2       | 0.08             | 6.46                  | 34       | 12      | 0.20     | 0.60     | 12-HETE d8        |
| 14(15)-EPETE   | 317.2         | 247.3       | 0.02             | 7.4                   | 32       | 10      | 1.15     | 3.47     | 14,15-EET d11     |
| 12-HETE        | 319.0         | 179.1       | 0.02             | 7.43                  | 32       | 14      | 0.63     | 1.89     | 12-HETE d8        |
| 5-HETE         | 319.1         | 114.9       | 0.08             | 7.64                  | 32       | 14      | 0.29     | 0.88     | 12-HETE d8        |
| 9-HETE         | 319.1         | 123.0       | 0.02             | 7.54                  | 32       | 14      | 0.22     | 0.67     | 12-HETE d8        |
| 15-HETE        | 319.1         | 219.0       | 0.02             | 7.17                  | 32       | 14      | 0.26     | 0.79     | 12-HETE d8        |
| 8(9)-EPETRE    | 319.1         | 155.1       | 0.20             | 8.23                  | 30       | 10      | 0.09     | 0.28     | 14,15-EET d11     |
| 11(12)-EPETRE  | 319.1         | 208.1       | 0.03             | 8.16                  | 30       | 10      | 0.48     | 1.44     | 14,15-EET d11     |
| 14(15)-EPETRE  | 319.1         | 219.1       | 0.03             | 7.93                  | 30       | 10      | 0.43     | 1.29     | 14,15-EET d11     |
| 12-HETE D8     | 327.2         | 184.1       | 0.02             | 7.38                  | 35       | 14      | 3.35     | 10.15    | -                 |
| 14,15-EET D11  | 330.1         | 219.0       | 0.03             | 7.88                  | 30       | 10      | 0.35     | 1.05     | -                 |
| 12-HPETE       | 335.1         | 153.1       | 0.02             | 7.54                  | 20       | 8       | 0.64     | 1.94     | 12-HETE d8        |
| 15-HPETE       | 335.1         | 219.1       | 0.02             | 7.33                  | 20       | 6       | 0.58     | 1.77     | 12-HETE d8        |
| 11(12)-DIHETE  | 335.2         | 167.2       | 0.05             | 5.53                  | 25       | 8       | 2.53     | 7.66     | 14,15-EET d11     |
| 14(15)-DIHETE  | 335.2         | 207.2       | 0.05             | 5.46                  | 25       | 8       | 0.07     | 0.21     | 14,15-EET d11     |
| 17(18)-DIHETE  | 335.2         | 247.2       | 0.11             | 5.29                  | 25       | 8       | 0.54     | 1.62     | 14,15-EET d11     |
| 8(9)-DIHETE    | 335.2         | 317.2       | 0.05             | 5.61                  | 25       | 8       | 1.58     | 4.78     | 14,15-EET d11     |
| 8(9)-DIHETRE   | 337.1         | 127.1       | 0.08             | 6.38                  | 28       | 8       | 1.21     | 3.68     | 14,15-EET d11     |
| 11(12)-DIHETRE | 337.1         | 167.1       | 0.08             | 6.19                  | 28       | 8       | 1.83     | 5.54     | 14,15-EET d11     |
| 14(15)-DIHETRE | 337.1         | 207.1       | 0.16             | 5.96                  | 28       | 8       | 0.64     | 1.95     | 14,15-EET d11     |
| CUDA           | 340.2         | 214.1       | 0.05             | 5.82                  | 34       | 12      | -        | -        | -                 |
| 7(8)-EPDPE     | 343.1         | 189.1       | 0.03             | 8.18                  | 34       | 10      | 1.41     | 4.27     | 12-HETE d8        |
| 13(14)-EPDPE   | 343.1         | 193.1       | 0.03             | 8.05                  | 34       | 10      | 0.58     | 1.77     | 12-HETE d8        |
| 16(17)-EPDPE   | 343.1         | 233.1       | 0.03             | 8.02                  | 34       | 10      | 0.21     | 0.62     | 12-HETE d8        |
| 19(20)-EPDPE   | 343.1         | 281.1       | 0.03             | 7.81                  | 34       | 10      | 0.28     | 0.85     | 12-HETE d8        |
| 10(11)-EPDPE   | 343.1         | 299.1       | 0.03             | 8.18                  | 34       | 10      | 0.74     | 2.26     | 12-HETE d8        |
| 4-HDOHE        | 343.2         | 101.1       | 0.03             | 7.81                  | 35       | 10      | 0.54     | 1.65     | 12-HETE d8        |
| 8-HDOHE        | 343.2         | 109.1       | 0.02             | 7.56                  | 35       | 10      | 0.15     | 0.47     | 12-HETE d8        |
| 7-HDOHE        | 343.2         | 141.1       | 0.02             | 7.51                  | 35       | 10      | 0.59     | 1.78     | 12-HETE d8        |
| 11-HDOHE       | 343.2         | 149.1       | 0.02             | 7.45                  | 35       | 10      | 0.59     | 1.80     | 12-HETE d8        |
| 10-HDOHE       | 343.2         | 181.1       | 0.02             | 7.37                  | 35       | 10      | 0.74     | 2.24     | 12-HETE d8        |
| 14-HDOHE       | 343.2         | 205.1       | 0.02             | 7.36                  | 35       | 10      | 0.23     | 0.70     | 12-HETE d8        |
| 13-HDOHE       | 343.2         | 221.1       | 0.02             | 7.3                   | 35       | 10      | 0.45     | 1.36     | 12-HETE d8        |
| 16-HDOHE       | 343.2         | 233.1       | 0.02             | 7.22                  | 35       | 12      | 0.85     | 2.58     | 12-HETE d8        |
| 20-HDOHE       | 343.2         | 241.1       | 0.02             | 7.06                  | 35       | 12      | 0.43     | 1.30     | 12-HETE d8        |
| 17-HDOHE       | 343.2         | 245.1       | 0.02             | 7.24                  | 35       | 12      | 0.27     | 0.83     | 12-HETE d8        |
| 22-HDOHE       | 343.2         | 281.1       | 0.04             | 6.96                  | 35       | 12      | 0.66     | 2.00     | 12-HETE d8        |
| RESOLVIN D1    | 375.1         | 141.1       | 0.16             | 4.15                  | 34       | 16      | 0.06     | 0.20     | 14,15-EET d11     |

**Supplemental Table 15.** Time dependent changes in myocyte oxylipins, by pool.

| Fraction   | Compartment |     |           |          |      | Myocytes           |                    | Interaction | Test for difference at each time |         |
|------------|-------------|-----|-----------|----------|------|--------------------|--------------------|-------------|----------------------------------|---------|
|            |             | pFA | Chemistry | Oxylipin | Time | WT (CI)            | KO (CI)            | Prob> t     | %Difference (CI)                 | Prob> t |
| Esterified | Cell        | LA  | Alcohol   | 9-HODE   | 0    | 15 (8, 25)         | 12 (7, 21)         | 0.76        | -17% (-74, 159)                  | >0.80   |
| Esterified | Cell        | LA  | Alcohol   | 9-HODE   | 15   | 20 (12, 34)        | 16 (10, 27)        |             | -20% (-69, 109)                  | >0.80   |
| Esterified | Cell        | LA  | Alcohol   | 9-HODE   | 30   | 26 (15, 43)        | 20 (12, 33)        |             | -23% (-69, 94)                   | >0.80   |
| Esterified | Cell        | LA  | Alcohol   | 9-HODE   | 60   | 28 (16, 50)        | 20 (11, 36)        |             | -28% (-80, 155)                  | >0.80   |
| NEOx       | Cell        | LA  | Alcohol   | 9-HODE   | 0    | 1.15 (0.63, 2.11)  | 1.02 (0.56, 1.88)  | >0.80       | -11% (-75, 217)                  | >0.80   |
| NEOx       | Cell        | LA  | Alcohol   | 9-HODE   | 15   | 1.13 (0.69, 1.86)  | 0.97 (0.59, 1.6)   |             | -14% (-68, 129)                  | >0.80   |
| NEOx       | Cell        | LA  | Alcohol   | 9-HODE   | 30   | 1.12 (0.66, 1.88)  | 0.93 (0.55, 1.56)  |             | -17% (-66, 107)                  | >0.80   |
| NEOx       | Cell        | LA  | Alcohol   | 9-HODE   | 60   | 1.1 (0.57, 2.11)   | 0.86 (0.45, 1.65)  |             | -22% (-82, 237)                  | >0.80   |
| Esterified | Media       | LA  | Alcohol   | 9-HODE   | 0    | 5.01 (3.09, 8.11)  | 4.02 (2.48, 6.51)  | >0.80       | -20% (-70, 114)                  | >0.80   |
| Esterified | Media       | LA  | Alcohol   | 9-HODE   | 15   | 4.85 (3.02, 7.78)  | 3.91 (2.44, 6.27)  |             | -19% (-67, 95)                   | >0.80   |
| Esterified | Media       | LA  | Alcohol   | 9-HODE   | 30   | 4.9 (3.06, 7.84)   | 3.97 (2.48, 6.35)  |             | -19% (-66, 91)                   | >0.80   |
| Esterified | Media       | LA  | Alcohol   | 9-HODE   | 60   | 5.65 (3.45, 9.25)  | 4.63 (2.83, 7.58)  |             | -18% (-71, 135)                  | >0.80   |
| NEOx       | Media       | LA  | Alcohol   | 9-HODE   | 0    | 0.6 (0.31, 1.15)   | 0.52 (0.27, 1)     | >0.80       | -13% (-78, 239)                  | >0.80   |
| NEOx       | Media       | LA  | Alcohol   | 9-HODE   | 15   | 0.86 (0.48, 1.55)  | 0.73 (0.41, 1.31)  |             | -15% (-73, 161)                  | >0.80   |
| NEOx       | Media       | LA  | Alcohol   | 9-HODE   | 30   | 1.04 (0.58, 1.89)  | 0.86 (0.47, 1.55)  |             | -18% (-72, 140)                  | >0.80   |
| NEOx       | Media       | LA  | Alcohol   | 9-HODE   | 60   | 0.9 (0.45, 1.78)   | 0.7 (0.35, 1.39)   |             | -22% (-83, 256)                  | >0.80   |
| Esterified | Cell        | LA  | Alcohol   | 13-HODE  | 0    | 18 (11, 31)        | 15 (9, 25)         | 0.53        | -19% (-74, 149)                  | >0.80   |
| Esterified | Cell        | LA  | Alcohol   | 13-HODE  | 15   | 23 (14, 39)        | 18 (11, 29)        |             | -24% (-71, 96)                   | >0.80   |
| Esterified | Cell        | LA  | Alcohol   | 13-HODE  | 30   | 28 (17, 46)        | 20 (12, 33)        |             | -29% (-72, 77)                   | >0.80   |
| Esterified | Cell        | LA  | Alcohol   | 13-HODE  | 60   | 32 (19, 57)        | 20 (11, 35)        |             | -38% (-82, 113)                  | >0.80   |
| NEOx       | Cell        | LA  | Alcohol   | 13-HODE  | 0    | 1.67 (0.94, 2.96)  | 1.24 (0.7, 2.19)   | 0.39        | -26% (-77, 141)                  | >0.80   |
| NEOx       | Cell        | LA  | Alcohol   | 13-HODE  | 15   | 1.76 (1.19, 2.6)   | 1.13 (0.77, 1.68)  |             | -36% (-77, 41)                   | 0.54    |
| NEOx       | Cell        | LA  | Alcohol   | 13-HODE  | 30   | 1.93 (1.25, 2.99)  | 1.08 (0.7, 1.67)   |             | -44% (-72, 11)                   | 0.13    |
| NEOx       | Cell        | LA  | Alcohol   | 13-HODE  | 60   | 2.62 (1.39, 4.93)  | 1.11 (0.59, 2.09)  |             | -58% (-90, 75)                   | 0.45    |
| Esterified | Media       | LA  | Alcohol   | 13-HODE  | 0    | 6.14 (3.53, 10.69) | 5.25 (3.02, 9.14)  | 0.61        | -15% (-71, 148)                  | >0.80   |
| Esterified | Media       | LA  | Alcohol   | 13-HODE  | 15   | 5.57 (3.18, 9.76)  | 4.9 (2.8, 8.59)    |             | -12% (-68, 144)                  | >0.80   |
| Esterified | Media       | LA  | Alcohol   | 13-HODE  | 30   | 5.46 (3.12, 9.53)  | 4.94 (2.83, 8.64)  |             | -9% (-67, 149)                   | >0.80   |
| Esterified | Media       | LA  | Alcohol   | 13-HODE  | 60   | 6.6 (3.79, 11.48)  | 6.34 (3.64, 11.03) |             | -4% (-68, 188)                   | >0.80   |
| NEOx       | Media       | LA  | Alcohol   | 13-HODE  | 0    | 0.45 (0.25, 0.83)  | 0.92 (0.5, 1.69)   | 0.35        | 105% (-38, 572)                  | 0.46    |
| NEOx       | Media       | LA  | Alcohol   | 13-HODE  | 15   | 0.94 (0.69, 1.28)  | 1.6 (1.17, 2.18)   |             | 71% (-5, 206)                    | 0.08    |
| NEOx       | Media       | LA  | Alcohol   | 13-HODE  | 30   | 1.43 (0.95, 2.15)  | 2.04 (1.36, 3.06)  |             | 43% (0, 103)                     | 0.05    |
| NEOx       | Media       | LA  | Alcohol   | 13-HODE  | 60   | 1.33 (0.67, 2.65)  | 1.32 (0.66, 2.63)  |             | -1% (-78, 349)                   | >0.80   |
| Esterified | Cell        | aLA | Alcohol   | 9-HOTrE  | 0    | 0.48 (0.22, 1.04)  | 0.15 (0.07, 0.33)  | 0.18        | -68% (-93, 51)                   | 0.24    |
| Esterified | Cell        | aLA | Alcohol   | 9-HOTrE  | 15   | 0.66 (0.42, 1.04)  | 0.29 (0.19, 0.46)  |             | -56% (-82, 9)                    | 0.09    |
| Esterified | Cell        | aLA | Alcohol   | 9-HOTrE  | 30   | 0.73 (0.42, 1.27)  | 0.45 (0.26, 0.77)  |             | -39% (-70, 23)                   | 0.28    |
| Esterified | Cell        | aLA | Alcohol   | 9-HOTrE  | 60   | 0.46 (0.19, 1.09)  | 0.53 (0.22, 1.26)  |             | 16% (-83, 692)                   | >0.80   |
| NEOx       | Cell        | aLA | Alcohol   | 9-HOTrE  | 0    | 0.17 (0.07, 0.44)  | 0.12 (0.05, 0.31)  | >0.80       | -29% (-90, 410)                  | >0.80   |
| NEOx       | Cell        | aLA | Alcohol   | 9-HOTrE  | 15   | 0.15 (0.07, 0.34)  | 0.11 (0.05, 0.25)  |             | -26% (-85, 259)                  | >0.80   |
| NEOx       | Cell        | aLA | Alcohol   | 9-HOTrE  | 30   | 0.15 (0.07, 0.34)  | 0.12 (0.05, 0.27)  |             | -22% (-82, 243)                  | >0.80   |
| NEOx       | Cell        | aLA | Alcohol   | 9-HOTrE  | 60   | 0.2 (0.07, 0.54)   | 0.17 (0.06, 0.46)  |             | -14% (-91, 706)                  | >0.80   |
| Esterified | Media       | aLA | Alcohol   | 9-HOTrE  | 0    | 0.5 (0.23, 1.1)    | 0.21 (0.1, 0.47)   | 0.34        | -57% (-91, 114)                  | 0.60    |
| Esterified | Media       | aLA | Alcohol   | 9-HOTrE  | 15   | 0.52 (0.31, 0.88)  | 0.28 (0.17, 0.47)  |             | -47% (-81, 51)                   | 0.45    |
| Esterified | Media       | aLA | Alcohol   | 9-HOTrE  | 30   | 0.54 (0.3, 0.98)   | 0.36 (0.2, 0.65)   |             | -34% (-73, 61)                   | 0.74    |
| Esterified | Media       | aLA | Alcohol   | 9-HOTrE  | 60   | 0.57 (0.24, 1.37)  | 0.59 (0.25, 1.41)  |             | 3% (-85, 627)                    | >0.80   |
| NEOx       | Media       | aLA | Alcohol   | 9-HOTrE  | 0    | 0.26 (0.14, 0.51)  | 0.2 (0.1, 0.38)    | 0.56        | -25% (-81, 189)                  | >0.80   |
| NEOx       | Media       | aLA | Alcohol   | 9-HOTrE  | 15   | 0.21 (0.13, 0.35)  | 0.17 (0.11, 0.29)  |             | -18% (-69, 121)                  | >0.80   |
| NEOx       | Media       | aLA | Alcohol   | 9-HOTrE  | 30   | 0.18 (0.11, 0.31)  | 0.17 (0.1, 0.28)   |             | -9% (-63, 123)                   | >0.80   |
| NEOx       | Media       | aLA | Alcohol   | 9-HOTrE  | 60   | 0.18 (0.09, 0.37)  | 0.2 (0.1, 0.41)    |             | 12% (-77, 446)                   | >0.80   |
| Esterified | Cell        | aLA | Alcohol   | 13-HOTrE | 0    | 0.6 (0.22, 1.63)   | 0.39 (0.14, 1.05)  | >0.80       | -35% (-92, 428)                  | >0.80   |
| Esterified | Cell        | aLA | Alcohol   | 13-HOTrE | 15   | 0.64 (0.29, 1.41)  | 0.41 (0.19, 0.91)  |             | -36% (-87, 208)                  | >0.80   |
| Esterified | Cell        | aLA | Alcohol   | 13-HOTrE | 30   | 0.69 (0.3, 1.59)   | 0.44 (0.19, 1.02)  |             | -36% (-85, 169)                  | >0.80   |
| Esterified | Cell        | aLA | Alcohol   | 13-HOTrE | 60   | 0.8 (0.27, 2.38)   | 0.51 (0.17, 1.51)  |             | -36% (-94, 633)                  | >0.80   |
| NEOx       | Cell        | aLA | Alcohol   | 13-HOTrE | 0    | 0.56 (0.23, 1.34)  | 0.39 (0.16, 0.94)  | 0.15        | -29% (-89, 342)                  | >0.80   |
| NEOx       | Cell        | aLA | Alcohol   | 13-HOTrE | 15   | 0.41 (0.2, 0.86)   | 0.21 (0.1, 0.44)   |             | -48% (-88, 119)                  | 0.75    |
| NEOx       | Cell        | aLA | Alcohol   | 13-HOTrE | 30   | 0.4 (0.19, 0.86)   | 0.15 (0.07, 0.33)  |             | -62% (-90, 46)                   | 0.26    |
| NEOx       | Cell        | aLA | Alcohol   | 13-HOTrE | 60   | 0.91 (0.36, 2.32)  | 0.18 (0.07, 0.47)  |             | -80% (-98, 64)                   | 0.21    |
| Esterified | Media       | aLA | Alcohol   | 13-HOTrE | 0    | 0.35 (0.16, 0.72)  | 0.2 (0.09, 0.41)   | 0.33        | -43% (-88, 168)                  | >0.80   |
| Esterified | Media       | aLA | Alcohol   | 13-HOTrE | 15   | 0.46 (0.25, 0.87)  | 0.31 (0.17, 0.58)  |             | -33% (-80, 128)                  | >0.80   |
| Esterified | Media       | aLA | Alcohol   | 13-HOTrE | 30   | 0.53 (0.28, 1.02)  | 0.43 (0.22, 0.82)  |             | -20% (-74, 151)                  | >0.80   |
| Esterified | Media       | aLA | Alcohol   | 13-HOTrE | 60   | 0.44 (0.2, 0.96)   | 0.5 (0.22, 1.09)   |             | 14% (-81, 571)                   | >0.80   |
| NEOx       | Media       | aLA | Alcohol   | 13-HOTrE | 0    | 0.14 (0.05, 0.36)  | 0.38 (0.14, 1.01)  | 0.29        | 179% (-64, 2042)                 | 0.65    |
| NEOx       | Media       | aLA | Alcohol   | 13-HOTrE | 15   | 0.15 (0.07, 0.35)  | 0.33 (0.15, 0.76)  |             | 117% (-57, 986)                  | 0.70    |
| NEOx       | Media       | aLA | Alcohol   | 13-HOTrE | 30   | 0.18 (0.08, 0.42)  | 0.31 (0.13, 0.72)  |             | 69% (-63, 665)                   | >0.80   |
| NEOx       | Media       | aLA | Alcohol   | 13-HOTrE | 60   | 0.28 (0.1, 0.79)   | 0.29 (0.1, 0.81)   |             | 3% (-90, 951)                    | >0.80   |
| Esterified | Cell        | AA  | Alcohol   | 5-HETE   | 0    | 15 (7, 32)         | 11 (5, 23)         | 0.57        | -27% (-85, 253)                  | >0.80   |
| Esterified | Cell        | AA  | Alcohol   | 5-HETE   | 15   | 20 (9, 42)         | 14 (6, 29)         |             | -31% (-83, 185)                  | >0.80   |
| Esterified | Cell        | AA  | Alcohol   | 5-HETE   | 30   | 25 (12, 53)        | 16 (7, 34)         |             | -36% (-84, 157)                  | >0.80   |
| Esterified | Cell        | AA  | Alcohol   | 5-HETE   | 60   | 31 (14, 69)        | 17 (8, 38)         |             | -44% (-90, 197)                  | >0.80   |
| NEOx       | Cell        | AA  | Alcohol   | 5-HETE   | 0    | 0.15 (0.1, 0.24)   | 0.13 (0.08, 0.2)   | 0.46        | -16% (-67, 119)                  | >0.80   |
| NEOx       | Cell        | AA  | Alcohol   | 5-HETE   | 15   | 0.19 (0.13, 0.29)  | 0.15 (0.1, 0.23)   |             | -22% (-64, 72)                   | >0.80   |
| NEOx       | Cell        | AA  | Alcohol   | 5-HETE   | 30   | 0.22 (0.15, 0.34)  | 0.16 (0.11, 0.24)  |             | -27% (-65, 54)                   | >0.80   |
| NEOx       | Cell        | AA  | Alcohol   | 5-HETE   | 60   | 0.22 (0.14, 0.36)  | 0.14 (0.09, 0.23)  |             | -37% (-78, 83)                   | 0.79    |
| Esterified | Media       | AA  | Alcohol   | 5-HETE   | 0    | 0.42 (0.2, 0.88)   | 0.33 (0.16, 0.69)  | >0.80       | -21% (-83, 256)                  | >0.80   |
| Esterified | Media       | AA  | Alcohol   | 5-HETE   | 15   | 0.4 (0.2, 0.81)    | 0.31 (0.15, 0.63)  |             | -23% (-79, 190)                  | >0.80   |
| Esterified | Media       | AA  | Alcohol   | 5-HETE   | 30   | 0.41 (0.2, 0.83)   | 0.31 (0.15, 0.63)  |             | -24% (-79, 174)                  | >0.80   |
| Esterified | Media       | AA  | Alcohol   | 5-HETE   | 60   | 0.51 (0.24, 1.09)  | 0.38 (0.18, 0.81)  |             | -26% (-86, 285)                  | >0.80   |
| NEOx       | Media       | AA  | Alcohol   | 5-HETE   | 0    | 0.16 (0.09, 0.26)  | 0.13 (0.08, 0.22)  | 0.27        | -14% (-70, 142)                  | >0.80   |
| NEOx       | Media       | AA  | Alcohol   | 5-HETE   | 15   | 0.16 (0.1, 0.26)   | 0.15 (0.09, 0.24)  |             | -5% (-62, 139)                   | >0.80   |
| NEOx       | Media       | AA  | Alcohol   | 5-HETE   | 30   | 0.16 (0.1, 0.25)   | 0.16 (0.1, 0.27)   |             | 5% (-57, 157)                    | >0.80   |
| NEOx       | Media       | AA  | Alcohol   | 5-HETE   | 60   | 0.15 (0.09, 0.26)  | 0.2 (0.12, 0.33)   |             | 27% (-58, 289)                   | >0.80   |

|                  |     |         |         |    |                    |                   |       |                 |       |
|------------------|-----|---------|---------|----|--------------------|-------------------|-------|-----------------|-------|
| Esterified Cell  | AA  | Alcohol | 9-HETE  | 0  | 1.02 (0.38, 2.75)  | 0.6 (0.22, 1.62)  | 0.65  | -41% (-93, 362) | >0.80 |
| Esterified Cell  | AA  | Alcohol | 9-HETE  | 15 | 0.89 (0.42, 1.89)  | 0.47 (0.22, 0.99) |       | -48% (-88, 133) | 0.79  |
| Esterified Cell  | AA  | Alcohol | 9-HETE  | 30 | 0.96 (0.43, 2.15)  | 0.45 (0.2, 1)     |       | -53% (-88, 80)  | 0.53  |
| Esterified Cell  | AA  | Alcohol | 9-HETE  | 60 | 2.1 (0.72, 6.16)   | 0.77 (0.26, 2.27) |       | -63% (-97, 313) | >0.80 |
| NEOx Cell        | AA  | Alcohol | 9-HETE  | 0  | 0.32 (0.18, 0.59)  | 0.3 (0.16, 0.55)  | 0.62  | -6% (-73, 221)  | >0.80 |
| NEOx Cell        | AA  | Alcohol | 9-HETE  | 15 | 0.48 (0.33, 0.71)  | 0.41 (0.28, 0.61) |       | -14% (-60, 86)  | >0.80 |
| NEOx Cell        | AA  | Alcohol | 9-HETE  | 30 | 0.61 (0.39, 0.95)  | 0.48 (0.31, 0.75) |       | -21% (-59, 49)  | >0.80 |
| NEOx Cell        | AA  | Alcohol | 9-HETE  | 60 | 0.6 (0.3, 1.17)    | 0.39 (0.2, 0.77)  |       | -34% (-85, 195) | >0.80 |
| Esterified Media | AA  | Alcohol | 9-HETE  | 0  | 0.4 (0.21, 0.76)   | 0.41 (0.21, 0.77) | 0.07  | 1% (-73, 283)   | >0.80 |
| Esterified Media | AA  | Alcohol | 9-HETE  | 15 | 0.48 (0.26, 0.87)  | 0.38 (0.21, 0.69) |       | -21% (-75, 150) | >0.80 |
| Esterified Media | AA  | Alcohol | 9-HETE  | 30 | 0.54 (0.3, 1)      | 0.34 (0.19, 0.62) |       | -38% (-79, 88)  | >0.80 |
| Esterified Media | AA  | Alcohol | 9-HETE  | 60 | 0.63 (0.32, 1.23)  | 0.24 (0.12, 0.47) |       | -61% (-91, 66)  | 0.36  |
| NEOx Media       | AA  | Alcohol | 9-HETE  | 0  | 0.35 (0.16, 0.76)  | 0.39 (0.18, 0.84) | >0.80 | 11% (-78, 452)  | >0.80 |
| NEOx Media       | AA  | Alcohol | 9-HETE  | 15 | 0.4 (0.19, 0.83)   | 0.44 (0.21, 0.93) |       | 12% (-72, 356)  | >0.80 |
| NEOx Media       | AA  | Alcohol | 9-HETE  | 30 | 0.39 (0.19, 0.83)  | 0.45 (0.21, 0.94) |       | 14% (-71, 343)  | >0.80 |
| NEOx Media       | AA  | Alcohol | 9-HETE  | 60 | 0.27 (0.12, 0.61)  | 0.32 (0.14, 0.71) |       | 17% (-80, 580)  | >0.80 |
| Esterified Cell  | AA  | Alcohol | 12-HETE | 0  | 0.85 (0.39, 1.89)  | 0.51 (0.23, 1.14) | 0.77  | -40% (-89, 218) | >0.80 |
| Esterified Cell  | AA  | Alcohol | 12-HETE | 15 | 1.05 (0.53, 2.09)  | 0.67 (0.34, 1.33) |       | -36% (-83, 142) | >0.80 |
| Esterified Cell  | AA  | Alcohol | 12-HETE | 30 | 1.2 (0.59, 2.42)   | 0.8 (0.4, 1.63)   |       | -33% (-81, 137) | >0.80 |
| Esterified Cell  | AA  | Alcohol | 12-HETE | 60 | 1.22 (0.53, 2.85)  | 0.92 (0.39, 2.13) |       | -25% (-89, 394) | >0.80 |
| NEOx Cell        | AA  | Alcohol | 12-HETE | 0  | 0.41 (0.26, 0.65)  | 0.36 (0.23, 0.57) | 0.39  | -13% (-65, 120) | >0.80 |
| NEOx Cell        | AA  | Alcohol | 12-HETE | 15 | 0.47 (0.3, 0.74)   | 0.43 (0.27, 0.68) |       | -7% (-60, 116)  | >0.80 |
| NEOx Cell        | AA  | Alcohol | 12-HETE | 30 | 0.49 (0.31, 0.77)  | 0.48 (0.31, 0.76) |       | -2% (-57, 125)  | >0.80 |
| NEOx Cell        | AA  | Alcohol | 12-HETE | 60 | 0.43 (0.27, 0.68)  | 0.47 (0.3, 0.75)  |       | 11% (-58, 195)  | >0.80 |
| Esterified Media | AA  | Alcohol | 12-HETE | 0  | 0.41 (0.27, 0.61)  | 0.36 (0.24, 0.53) | 0.66  | -13% (-61, 93)  | >0.80 |
| Esterified Media | AA  | Alcohol | 12-HETE | 15 | 0.45 (0.3, 0.66)   | 0.38 (0.25, 0.56) |       | -16% (-60, 77)  | >0.80 |
| Esterified Media | AA  | Alcohol | 12-HETE | 30 | 0.48 (0.32, 0.72)  | 0.4 (0.27, 0.59)  |       | -18% (-60, 70)  | >0.80 |
| Esterified Media | AA  | Alcohol | 12-HETE | 60 | 0.54 (0.36, 0.81)  | 0.42 (0.28, 0.64) |       | -22% (-67, 83)  | >0.80 |
| NEOx Media       | AA  | Alcohol | 12-HETE | 0  | 0.51 (0.32, 0.8)   | 0.36 (0.23, 0.57) | 0.63  | -29% (-71, 78)  | >0.80 |
| NEOx Media       | AA  | Alcohol | 12-HETE | 15 | 0.49 (0.31, 0.78)  | 0.36 (0.23, 0.58) |       | -26% (-69, 72)  | >0.80 |
| NEOx Media       | AA  | Alcohol | 12-HETE | 30 | 0.48 (0.3, 0.76)   | 0.36 (0.23, 0.58) |       | -24% (-67, 75)  | >0.80 |
| NEOx Media       | AA  | Alcohol | 12-HETE | 60 | 0.47 (0.29, 0.74)  | 0.38 (0.24, 0.6)  |       | -20% (-69, 110) | >0.80 |
| Esterified Cell  | AA  | Alcohol | 15-HETE | 0  | 1.13 (0.31, 4.1)   | 1.19 (0.33, 4.31) | >0.80 | 5% (-93, 1460)  | >0.80 |
| Esterified Cell  | AA  | Alcohol | 15-HETE | 15 | 1.21 (0.39, 3.76)  | 1.29 (0.41, 4.01) |       | 7% (-88, 857)   | >0.80 |
| Esterified Cell  | AA  | Alcohol | 15-HETE | 30 | 1.3 (0.41, 4.12)   | 1.41 (0.44, 4.48) |       | 9% (-86, 768)   | >0.80 |
| Esterified Cell  | AA  | Alcohol | 15-HETE | 60 | 1.51 (0.38, 5.89)  | 1.69 (0.43, 6.62) |       | 12% (-95, 2260) | >0.80 |
| NEOx Cell        | AA  | Alcohol | 15-HETE | 0  | 0.33 (0.15, 0.73)  | 0.3 (0.14, 0.65)  | 0.61  | -11% (-82, 337) | >0.80 |
| NEOx Cell        | AA  | Alcohol | 15-HETE | 15 | 0.29 (0.14, 0.61)  | 0.28 (0.13, 0.58) |       | -4% (-77, 289)  | >0.80 |
| NEOx Cell        | AA  | Alcohol | 15-HETE | 30 | 0.27 (0.13, 0.57)  | 0.28 (0.13, 0.59) |       | 3% (-74, 300)   | >0.80 |
| NEOx Cell        | AA  | Alcohol | 15-HETE | 60 | 0.31 (0.14, 0.69)  | 0.37 (0.17, 0.81) |       | 18% (-79, 565)  | >0.80 |
| Esterified Media | AA  | Alcohol | 15-HETE | 0  | 0.22 (0.13, 0.38)  | 0.18 (0.1, 0.31)  | 0.42  | -19% (-74, 154) | >0.80 |
| Esterified Media | AA  | Alcohol | 15-HETE | 15 | 0.26 (0.16, 0.42)  | 0.19 (0.12, 0.31) |       | -27% (-71, 85)  | >0.80 |
| Esterified Media | AA  | Alcohol | 15-HETE | 30 | 0.31 (0.19, 0.51)  | 0.21 (0.13, 0.34) |       | -34% (-73, 59)  | 0.72  |
| Esterified Media | AA  | Alcohol | 15-HETE | 60 | 0.5 (0.28, 0.9)    | 0.27 (0.15, 0.49) |       | -46% (-85, 97)  | 0.71  |
| NEOx Media       | AA  | Alcohol | 15-HETE | 0  | 0.19 (0.1, 0.39)   | 0.23 (0.12, 0.47) | 0.53  | 21% (-71, 404)  | >0.80 |
| NEOx Media       | AA  | Alcohol | 15-HETE | 15 | 0.21 (0.11, 0.39)  | 0.23 (0.12, 0.44) |       | 11% (-68, 278)  | >0.80 |
| NEOx Media       | AA  | Alcohol | 15-HETE | 30 | 0.23 (0.12, 0.43)  | 0.23 (0.12, 0.44) |       | 2% (-69, 232)   | >0.80 |
| NEOx Media       | AA  | Alcohol | 15-HETE | 60 | 0.3 (0.15, 0.62)   | 0.26 (0.13, 0.54) |       | -14% (-82, 314) | >0.80 |
| Esterified Cell  | EPA | Alcohol | 5-HEPE  | 0  | 0.89 (0.24, 3.26)  | 0.86 (0.23, 3.18) | 0.21  | -2% (-93, 1305) | >0.80 |
| Esterified Cell  | EPA | Alcohol | 5-HEPE  | 15 | 1.12 (0.32, 3.99)  | 0.82 (0.23, 2.91) |       | -27% (-93, 680) | >0.80 |
| Esterified Cell  | EPA | Alcohol | 5-HEPE  | 30 | 1.61 (0.45, 5.69)  | 0.88 (0.25, 3.1)  |       | -46% (-95, 447) | >0.80 |
| Esterified Cell  | EPA | Alcohol | 5-HEPE  | 60 | 4.71 (1.24, 17.92) | 1.43 (0.38, 5.45) |       | -70% (-98, 444) | >0.80 |
| NEOx Cell        | EPA | Alcohol | 5-HEPE  | 0  | 0.34 (0.21, 0.54)  | 0.26 (0.16, 0.42) | >0.80 | -23% (-70, 99)  | >0.80 |
| NEOx Cell        | EPA | Alcohol | 5-HEPE  | 15 | 0.31 (0.2, 0.5)    | 0.24 (0.15, 0.39) |       | -22% (-67, 83)  | >0.80 |
| NEOx Cell        | EPA | Alcohol | 5-HEPE  | 30 | 0.32 (0.2, 0.51)   | 0.25 (0.16, 0.4)  |       | -22% (-66, 81)  | >0.80 |
| NEOx Cell        | EPA | Alcohol | 5-HEPE  | 60 | 0.45 (0.28, 0.73)  | 0.36 (0.22, 0.57) |       | -21% (-71, 119) | >0.80 |
| Esterified Media | EPA | Alcohol | 5-HEPE  | 0  | 0.36 (0.23, 0.58)  | 0.28 (0.17, 0.44) | 0.14  | -24% (-71, 99)  | >0.80 |
| Esterified Media | EPA | Alcohol | 5-HEPE  | 15 | 0.32 (0.2, 0.5)    | 0.28 (0.18, 0.43) |       | -13% (-62, 102) | >0.80 |
| Esterified Media | EPA | Alcohol | 5-HEPE  | 30 | 0.29 (0.19, 0.46)  | 0.29 (0.19, 0.45) |       | -1% (-56, 124)  | >0.80 |
| Esterified Media | EPA | Alcohol | 5-HEPE  | 60 | 0.28 (0.17, 0.45)  | 0.36 (0.22, 0.58) |       | 29% (-55, 269)  | >0.80 |
| NEOx Media       | EPA | Alcohol | 5-HEPE  | 0  | 0.39 (0.22, 0.69)  | 0.2 (0.11, 0.34)  | 0.001 | -50% (-84, 51)  | 0.41  |
| NEOx Media       | EPA | Alcohol | 5-HEPE  | 15 | 0.31 (0.18, 0.55)  | 0.21 (0.12, 0.37) |       | -34% (-77, 88)  | >0.80 |
| NEOx Media       | EPA | Alcohol | 5-HEPE  | 30 | 0.26 (0.15, 0.47)  | 0.24 (0.13, 0.41) |       | -11% (-68, 147) | >0.80 |
| NEOx Media       | EPA | Alcohol | 5-HEPE  | 60 | 0.23 (0.13, 0.41)  | 0.37 (0.21, 0.66) |       | 59% (-51, 411)  | >0.80 |
| Esterified Cell  | EPA | Alcohol | 8-HEPE  | 0  | 1.15 (0.71, 1.86)  | 0.54 (0.33, 0.87) | 0.08  | -53% (-83, 28)  | 0.22  |
| Esterified Cell  | EPA | Alcohol | 8-HEPE  | 15 | 0.94 (0.63, 1.4)   | 0.55 (0.37, 0.82) |       | -42% (-73, 28)  | 0.31  |
| Esterified Cell  | EPA | Alcohol | 8-HEPE  | 30 | 0.83 (0.55, 1.26)  | 0.6 (0.4, 0.91)   |       | -28% (-65, 51)  | 0.78  |
| Esterified Cell  | EPA | Alcohol | 8-HEPE  | 60 | 0.83 (0.49, 1.38)  | 0.93 (0.55, 1.55) |       | 12% (-65, 256)  | >0.80 |
| NEOx Cell        | EPA | Alcohol | 8-HEPE  | 0  | 0.55 (0.29, 1.03)  | 0.38 (0.2, 0.72)  | 0.77  | -30% (-82, 164) | >0.80 |
| NEOx Cell        | EPA | Alcohol | 8-HEPE  | 15 | 0.57 (0.32, 1.01)  | 0.41 (0.23, 0.73) |       | -28% (-76, 117) | >0.80 |
| NEOx Cell        | EPA | Alcohol | 8-HEPE  | 30 | 0.61 (0.34, 1.08)  | 0.46 (0.25, 0.81) |       | -25% (-74, 115) | >0.80 |
| NEOx Cell        | EPA | Alcohol | 8-HEPE  | 60 | 0.72 (0.37, 1.4)   | 0.59 (0.3, 1.14)  |       | -18% (-82, 263) | >0.80 |
| Esterified Media | EPA | Alcohol | 8-HEPE  | 0  | 0.44 (0.22, 0.89)  | 0.52 (0.26, 1.05) | 0.66  | 17% (-72, 392)  | >0.80 |
| Esterified Media | EPA | Alcohol | 8-HEPE  | 15 | 0.5 (0.25, 1)      | 0.56 (0.28, 1.12) |       | 11% (-69, 305)  | >0.80 |
| Esterified Media | EPA | Alcohol | 8-HEPE  | 30 | 0.54 (0.27, 1.07)  | 0.57 (0.29, 1.13) |       | 6% (-70, 273)   | >0.80 |
| Esterified Media | EPA | Alcohol | 8-HEPE  | 60 | 0.51 (0.25, 1.04)  | 0.48 (0.24, 0.99) |       | -5% (-80, 345)  | >0.80 |
| NEOx Media       | EPA | Alcohol | 8-HEPE  | 0  | 0.6 (0.35, 1.03)   | 0.59 (0.34, 1)    | >0.80 | -2% (-68, 196)  | >0.80 |
| NEOx Media       | EPA | Alcohol | 8-HEPE  | 15 | 0.59 (0.36, 0.97)  | 0.58 (0.35, 0.97) |       | -1% (-62, 158)  | >0.80 |
| NEOx Media       | EPA | Alcohol | 8-HEPE  | 30 | 0.55 (0.33, 0.9)   | 0.55 (0.33, 0.91) |       | 1% (-60, 153)   | >0.80 |
| NEOx Media       | EPA | Alcohol | 8-HEPE  | 60 | 0.4 (0.23, 0.69)   | 0.41 (0.24, 0.72) |       | 4% (-69, 251)   | >0.80 |
| Esterified Cell  | EPA | Alcohol | 11-HEPE | 0  | 0.39 (0.25, 0.6)   | 0.46 (0.3, 0.72)  | 0.08  | 20% (-53, 206)  | >0.80 |
| Esterified Cell  | EPA | Alcohol | 11-HEPE | 15 | 0.36 (0.24, 0.53)  | 0.36 (0.24, 0.52) |       | -1% (-53, 112)  | >0.80 |
| Esterified Cell  | EPA | Alcohol | 11-HEPE | 30 | 0.37 (0.25, 0.55)  | 0.31 (0.21, 0.46) |       | -17% (-60, 68)  | >0.80 |
| Esterified Cell  | EPA | Alcohol | 11-HEPE | 60 | 0.58 (0.36, 0.94)  | 0.33 (0.21, 0.53) |       | -43% (-80, 64)  | 0.59  |
| NEOx Cell        | EPA | Alcohol | 11-HEPE | 0  | 0.28 (0.15, 0.52)  | 0.26 (0.14, 0.49) | 0.32  | -6% (-74, 238)  | >0.80 |

|            |       |     |         |         |    |                     |                     |        |                 |                   |
|------------|-------|-----|---------|---------|----|---------------------|---------------------|--------|-----------------|-------------------|
| NEOx       | Cell  | EPA | Alcohol | 11-HEPE | 15 | 0.32 (0.19, 0.54)   | 0.26 (0.15, 0.44)   |        | -18% (-71, 132) | >0.80             |
| NEOx       | Cell  | EPA | Alcohol | 11-HEPE | 30 | 0.36 (0.21, 0.62)   | 0.26 (0.15, 0.44)   |        | -29% (-73, 91)  | >0.80             |
| NEOx       | Cell  | EPA | Alcohol | 11-HEPE | 60 | 0.46 (0.24, 0.89)   | 0.25 (0.13, 0.48)   |        | -46% (-87, 130) | >0.80             |
| Esterified | Media | EPA | Alcohol | 11-HEPE | 0  | 0.29 (0.16, 0.51)   | 0.23 (0.13, 0.4)    | 0.7    | -22% (-76, 153) | >0.80             |
| Esterified | Media | EPA | Alcohol | 11-HEPE | 15 | 0.36 (0.22, 0.6)    | 0.27 (0.16, 0.45)   |        | -25% (-72, 97)  | >0.80             |
| Esterified | Media | EPA | Alcohol | 11-HEPE | 30 | 0.39 (0.23, 0.65)   | 0.28 (0.17, 0.46)   |        | -29% (-72, 80)  | >0.80             |
| Esterified | Media | EPA | Alcohol | 11-HEPE | 60 | 0.28 (0.15, 0.5)    | 0.18 (0.1, 0.33)    |        | -35% (-83, 141) | >0.80             |
| NEOx       | Media | EPA | Alcohol | 11-HEPE | 0  | 0.34 (0.23, 0.51)   | 0.22 (0.15, 0.33)   | 0.7    | -36% (-73, 50)  | 0.61              |
| NEOx       | Media | EPA | Alcohol | 11-HEPE | 15 | 0.32 (0.22, 0.48)   | 0.21 (0.14, 0.32)   |        | -34% (-68, 38)  | 0.54              |
| NEOx       | Media | EPA | Alcohol | 11-HEPE | 30 | 0.31 (0.21, 0.46)   | 0.21 (0.14, 0.31)   |        | -32% (-67, 39)  | 0.58              |
| NEOx       | Media | EPA | Alcohol | 11-HEPE | 60 | 0.3 (0.19, 0.46)    | 0.22 (0.14, 0.33)   |        | -28% (-71, 82)  | >0.80             |
| Esterified | Cell  | EPA | Alcohol | 12-HEPE | 0  | 0.36 (0.16, 0.78)   | 0.24 (0.11, 0.53)   | >0.80  | -32% (-87, 250) | >0.80             |
| Esterified | Cell  | EPA | Alcohol | 12-HEPE | 15 | 0.33 (0.17, 0.68)   | 0.23 (0.12, 0.47)   |        | -30% (-82, 171) | >0.80             |
| Esterified | Cell  | EPA | Alcohol | 12-HEPE | 30 | 0.34 (0.17, 0.7)    | 0.25 (0.12, 0.51)   |        | -28% (-80, 162) | >0.80             |
| Esterified | Cell  | EPA | Alcohol | 12-HEPE | 60 | 0.48 (0.21, 1.09)   | 0.37 (0.16, 0.83)   |        | -23% (-88, 380) | >0.80             |
| NEOx       | Cell  | EPA | Alcohol | 12-HEPE | 0  | 0.37 (0.22, 0.62)   | 0.19 (0.11, 0.33)   | 0.34   | -48% (-82, 57)  | 0.48              |
| NEOx       | Cell  | EPA | Alcohol | 12-HEPE | 15 | 0.33 (0.22, 0.5)    | 0.2 (0.13, 0.3)     |        | -41% (-74, 37)  | 0.42              |
| NEOx       | Cell  | EPA | Alcohol | 12-HEPE | 30 | 0.3 (0.19, 0.47)    | 0.2 (0.13, 0.32)    |        | -33% (-69, 46)  | 0.64              |
| NEOx       | Cell  | EPA | Alcohol | 12-HEPE | 60 | 0.27 (0.15, 0.47)   | 0.23 (0.13, 0.41)   |        | -14% (-76, 206) | >0.80             |
| Esterified | Media | EPA | Alcohol | 12-HEPE | 0  | 0.33 (0.23, 0.48)   | 0.24 (0.16, 0.35)   | 0.04   | -28% (-67, 59)  | >0.80             |
| Esterified | Media | EPA | Alcohol | 12-HEPE | 15 | 0.26 (0.19, 0.37)   | 0.23 (0.17, 0.32)   |        | -12% (-53, 65)  | >0.80             |
| Esterified | Media | EPA | Alcohol | 12-HEPE | 30 | 0.23 (0.16, 0.32)   | 0.24 (0.17, 0.34)   |        | 7% (-41, 93)    | >0.80             |
| Esterified | Media | EPA | Alcohol | 12-HEPE | 60 | 0.22 (0.14, 0.32)   | 0.34 (0.23, 0.51)   |        | 58% (-36, 290)  | 0.65              |
| NEOx       | Media | EPA | Alcohol | 12-HEPE | 0  | 0.3 (0.14, 0.67)    | 0.17 (0.08, 0.38)   | 0.17   | -44% (-88, 162) | >0.80             |
| NEOx       | Media | EPA | Alcohol | 12-HEPE | 15 | 0.26 (0.12, 0.59)   | 0.17 (0.08, 0.38)   |        | -36% (-85, 175) | >0.80             |
| NEOx       | Media | EPA | Alcohol | 12-HEPE | 30 | 0.24 (0.11, 0.53)   | 0.18 (0.08, 0.39)   |        | -27% (-83, 208) | >0.80             |
| NEOx       | Media | EPA | Alcohol | 12-HEPE | 60 | 0.23 (0.1, 0.51)    | 0.22 (0.1, 0.48)    |        | -6% (-81, 366)  | >0.80             |
| Esterified | Cell  | EPA | Alcohol | 18-HEPE | 0  | 0.19 (0.11, 0.32)   | 0.15 (0.09, 0.25)   | 0.004  | -22% (-72, 122) | >0.80             |
| Esterified | Cell  | EPA | Alcohol | 18-HEPE | 15 | 0.37 (0.29, 0.49)   | 0.17 (0.13, 0.22)   |        | -55% (-73, -26) | <b>0.001</b>      |
| Esterified | Cell  | EPA | Alcohol | 18-HEPE | 30 | 0.6 (0.42, 0.86)    | 0.16 (0.11, 0.22)   |        | -74% (-81, -66) | <b>&lt;0.0001</b> |
| Esterified | Cell  | EPA | Alcohol | 18-HEPE | 60 | 0.82 (0.45, 1.5)    | 0.07 (0.04, 0.13)   |        | -91% (-98, -68) | <b>0.0002</b>     |
| NEOx       | Cell  | EPA | Alcohol | 18-HEPE | 0  | 0.12 (0.08, 0.19)   | 0.08 (0.06, 0.13)   | 0.0005 | -33% (-72, 62)  | 0.76              |
| NEOx       | Cell  | EPA | Alcohol | 18-HEPE | 15 | 0.26 (0.18, 0.37)   | 0.11 (0.08, 0.16)   |        | -56% (-78, -13) | <b>0.01</b>       |
| NEOx       | Cell  | EPA | Alcohol | 18-HEPE | 30 | 0.43 (0.3, 0.62)    | 0.12 (0.08, 0.18)   |        | -72% (-85, -46) | <b>0.0001</b>     |
| NEOx       | Cell  | EPA | Alcohol | 18-HEPE | 60 | 0.61 (0.39, 0.95)   | 0.07 (0.05, 0.11)   |        | -88% (-96, -67) | <b>&lt;0.0001</b> |
| Esterified | Media | EPA | Alcohol | 18-HEPE | 0  | 0.32 (0.18, 0.55)   | 0.17 (0.1, 0.3)     | 0.09   | -46% (-83, 68)  | 0.57              |
| Esterified | Media | EPA | Alcohol | 18-HEPE | 15 | 0.34 (0.2, 0.56)    | 0.15 (0.09, 0.25)   |        | -56% (-83, 16)  | 0.13              |
| Esterified | Media | EPA | Alcohol | 18-HEPE | 30 | 0.37 (0.22, 0.61)   | 0.13 (0.08, 0.22)   |        | -64% (-86, -8)  | <b>0.03</b>       |
| Esterified | Media | EPA | Alcohol | 18-HEPE | 60 | 0.47 (0.27, 0.84)   | 0.12 (0.07, 0.21)   |        | -75% (-93, -13) | <b>0.02</b>       |
| NEOx       | Media | EPA | Alcohol | 18-HEPE | 0  | 0.14 (0.07, 0.27)   | 0.14 (0.07, 0.29)   | 0.14   | 6% (-75, 344)   | >0.80             |
| NEOx       | Media | EPA | Alcohol | 18-HEPE | 15 | 0.15 (0.08, 0.29)   | 0.13 (0.07, 0.25)   |        | -14% (-75, 195) | >0.80             |
| NEOx       | Media | EPA | Alcohol | 18-HEPE | 30 | 0.17 (0.09, 0.32)   | 0.12 (0.06, 0.23)   |        | -30% (-79, 130) | >0.80             |
| NEOx       | Media | EPA | Alcohol | 18-HEPE | 60 | 0.19 (0.09, 0.4)    | 0.09 (0.04, 0.19)   |        | -53% (-90, 125) | 0.69              |
| Esterified | Cell  | DHA | Alcohol | 4-HDoHE | 0  | 23.7 (10.5, 53.3)   | 24.4 (10.9, 54.9)   | 0.6    | 3% (-81, 447)   | >0.80             |
| Esterified | Cell  | DHA | Alcohol | 4-HDoHE | 15 | 30.9 (14.2, 67.4)   | 29.5 (13.5, 64.3)   |        | -5% (-78, 313)  | >0.80             |
| Esterified | Cell  | DHA | Alcohol | 4-HDoHE | 30 | 38.1 (17.5, 83.1)   | 33.7 (15.5, 73.4)   |        | -12% (-79, 266) | >0.80             |
| Esterified | Cell  | DHA | Alcohol | 4-HDoHE | 60 | 48.6 (21.1, 112.2)  | 36.8 (16, 84.8)     |        | -24% (-88, 365) | >0.80             |
| NEOx       | Cell  | DHA | Alcohol | 4-HDoHE | 0  | 0.57 (0.36, 0.89)   | 0.39 (0.25, 0.62)   | >0.80  | -30% (-72, 73)  | >0.80             |
| NEOx       | Cell  | DHA | Alcohol | 4-HDoHE | 15 | 0.64 (0.4, 1)       | 0.44 (0.28, 0.7)    |        | -30% (-70, 61)  | 0.80              |
| NEOx       | Cell  | DHA | Alcohol | 4-HDoHE | 30 | 0.67 (0.43, 1.05)   | 0.47 (0.3, 0.74)    |        | -30% (-69, 59)  | 0.79              |
| NEOx       | Cell  | DHA | Alcohol | 4-HDoHE | 60 | 0.62 (0.39, 0.97)   | 0.43 (0.27, 0.68)   |        | -30% (-73, 83)  | >0.80             |
| Esterified | Media | DHA | Alcohol | 4-HDoHE | 0  | 0.5 (0.25, 0.99)    | 0.59 (0.3, 1.18)    | 0.39   | 19% (-72, 406)  | >0.80             |
| Esterified | Media | DHA | Alcohol | 4-HDoHE | 15 | 0.76 (0.42, 1.38)   | 0.79 (0.43, 1.44)   |        | 4% (-67, 232)   | >0.80             |
| Esterified | Media | DHA | Alcohol | 4-HDoHE | 30 | 1.01 (0.55, 1.86)   | 0.91 (0.49, 1.68)   |        | -9% (-70, 171)  | >0.80             |
| Esterified | Media | DHA | Alcohol | 4-HDoHE | 60 | 1.15 (0.55, 2.39)   | 0.79 (0.38, 1.64)   |        | -31% (-87, 253) | >0.80             |
| NEOx       | Media | DHA | Alcohol | 4-HDoHE | 0  | 0.55 (0.36, 0.83)   | 0.54 (0.36, 0.82)   | 0.65   | -1% (-56, 123)  | >0.80             |
| NEOx       | Media | DHA | Alcohol | 4-HDoHE | 15 | 0.53 (0.35, 0.8)    | 0.53 (0.35, 0.81)   |        | 1% (-52, 116)   | >0.80             |
| NEOx       | Media | DHA | Alcohol | 4-HDoHE | 30 | 0.5 (0.33, 0.76)    | 0.52 (0.35, 0.79)   |        | 4% (-51, 119)   | >0.80             |
| NEOx       | Media | DHA | Alcohol | 4-HDoHE | 60 | 0.46 (0.3, 0.69)    | 0.5 (0.33, 0.76)    |        | 9% (-54, 157)   | >0.80             |
| Esterified | Cell  | DHA | Alcohol | 7-HDoHE | 0  | 1.1 (0.37, 3.22)    | 1.56 (0.53, 4.58)   | 0.51   | 42% (-85, 1263) | >0.80             |
| Esterified | Cell  | DHA | Alcohol | 7-HDoHE | 15 | 1.49 (0.57, 3.88)   | 1.81 (0.69, 4.71)   |        | 21% (-81, 669)  | >0.80             |
| Esterified | Cell  | DHA | Alcohol | 7-HDoHE | 30 | 1.93 (0.73, 5.11)   | 2 (0.75, 5.29)      |        | 3% (-82, 496)   | >0.80             |
| Esterified | Cell  | DHA | Alcohol | 7-HDoHE | 60 | 2.77 (0.89, 8.68)   | 2.09 (0.67, 6.53)   |        | -25% (-94, 858) | >0.80             |
| NEOx       | Cell  | DHA | Alcohol | 7-HDoHE | 0  | 0.55 (0.37, 0.82)   | 0.55 (0.37, 0.83)   | 0.12   | 1% (-57, 135)   | >0.80             |
| NEOx       | Cell  | DHA | Alcohol | 7-HDoHE | 15 | 0.64 (0.46, 0.9)    | 0.56 (0.4, 0.78)    |        | -14% (-55, 68)  | >0.80             |
| NEOx       | Cell  | DHA | Alcohol | 7-HDoHE | 30 | 0.73 (0.51, 1.04)   | 0.54 (0.38, 0.76)   |        | -26% (-60, 37)  | 0.68              |
| NEOx       | Cell  | DHA | Alcohol | 7-HDoHE | 60 | 0.83 (0.54, 1.27)   | 0.45 (0.29, 0.69)   |        | -46% (-79, 42)  | 0.39              |
| Esterified | Media | DHA | Alcohol | 7-HDoHE | 0  | 0.7 (0.37, 1.33)    | 0.45 (0.24, 0.85)   | 0.34   | -36% (-82, 125) | >0.80             |
| Esterified | Media | DHA | Alcohol | 7-HDoHE | 15 | 0.69 (0.37, 1.32)   | 0.48 (0.25, 0.91)   |        | -31% (-79, 124) | >0.80             |
| Esterified | Media | DHA | Alcohol | 7-HDoHE | 30 | 0.67 (0.36, 1.28)   | 0.5 (0.27, 0.95)    |        | -25% (-77, 138) | >0.80             |
| Esterified | Media | DHA | Alcohol | 7-HDoHE | 60 | 0.6 (0.32, 1.14)    | 0.53 (0.28, 1)      |        | -13% (-77, 227) | >0.80             |
| NEOx       | Media | DHA | Alcohol | 7-HDoHE | 0  | 0.57 (0.28, 1.16)   | 0.5 (0.25, 1.01)    | 0.68   | -13% (-78, 246) | >0.80             |
| NEOx       | Media | DHA | Alcohol | 7-HDoHE | 15 | 0.57 (0.28, 1.15)   | 0.51 (0.25, 1.04)   |        | -10% (-75, 232) | >0.80             |
| NEOx       | Media | DHA | Alcohol | 7-HDoHE | 30 | 0.56 (0.28, 1.14)   | 0.53 (0.26, 1.07)   |        | -7% (-74, 238)  | >0.80             |
| NEOx       | Media | DHA | Alcohol | 7-HDoHE | 60 | 0.57 (0.28, 1.16)   | 0.57 (0.28, 1.16)   |        | 0% (-76, 319)   | >0.80             |
| Esterified | Cell  | DHA | Alcohol | 8-HDoHE | 0  | 3.92 (1.86, 8.27)   | 2.98 (1.41, 6.3)    | >0.80  | -24% (-84, 262) | >0.80             |
| Esterified | Cell  | DHA | Alcohol | 8-HDoHE | 15 | 7.73 (4.39, 13.63)  | 6.02 (3.42, 10.61)  |        | -22% (-75, 140) | >0.80             |
| Esterified | Cell  | DHA | Alcohol | 8-HDoHE | 30 | 11.82 (6.44, 21.7)  | 9.41 (5.13, 17.27)  |        | -20% (-71, 121) | >0.80             |
| Esterified | Cell  | DHA | Alcohol | 8-HDoHE | 60 | 12.81 (5.67, 28.94) | 10.65 (4.71, 24.07) |        | -17% (-87, 420) | >0.80             |
| NEOx       | Cell  | DHA | Alcohol | 8-HDoHE | 0  | 0.61 (0.36, 1.02)   | 0.49 (0.29, 0.83)   | 0.17   | -19% (-73, 138) | >0.80             |
| NEOx       | Cell  | DHA | Alcohol | 8-HDoHE | 15 | 0.97 (0.59, 1.59)   | 0.68 (0.42, 1.12)   |        | -30% (-72, 78)  | >0.80             |
| NEOx       | Cell  | DHA | Alcohol | 8-HDoHE | 30 | 1.26 (0.77, 2.07)   | 0.77 (0.47, 1.26)   |        | -39% (-75, 50)  | 0.56              |
| NEOx       | Cell  | DHA | Alcohol | 8-HDoHE | 60 | 1.13 (0.66, 1.94)   | 0.52 (0.3, 0.89)    |        | -54% (-86, 50)  | 0.36              |
| NEOx       | Media | DHA | Alcohol | 8-HDoHE | 0  | 0.97 (0.55, 1.7)    | 0.76 (0.43, 1.33)   | 0.62   | -22% (-75, 144) | >0.80             |
| NEOx       | Media | DHA | Alcohol | 8-HDoHE | 15 | 0.77 (0.44, 1.34)   | 0.63 (0.36, 1.09)   |        | -18% (-71, 130) | >0.80             |



|            |       |     |         |          |    |                     |                    |                   |       |
|------------|-------|-----|---------|----------|----|---------------------|--------------------|-------------------|-------|
| NEOx       | Media | DHA | Alcohol | 8-HDoHE  | 30 | 0.68 (0.39, 1.18)   | 0.58 (0.33, 1.01)  | -15% (-69, 135)   | >0.80 |
| NEOx       | Media | DHA | Alcohol | 8-HDoHE  | 60 | 0.75 (0.42, 1.33)   | 0.7 (0.39, 1.23)   | -7% (-72, 211)    | >0.80 |
| Esterified | Cell  | DHA | Alcohol | 10-HDoHE | 0  | 1.29 (0.45, 3.7)    | 0.99 (0.34, 2.84)  | -23% (-91, 586)   | >0.80 |
| Esterified | Cell  | DHA | Alcohol | 10-HDoHE | 15 | 1.84 (0.68, 4.96)   | 1.47 (0.55, 3.96)  | -20% (-88, 423)   | >0.80 |
| Esterified | Cell  | DHA | Alcohol | 10-HDoHE | 30 | 2.43 (0.9, 6.56)    | 2.01 (0.74, 5.45)  | -17% (-86, 408)   | >0.80 |
| Esterified | Cell  | DHA | Alcohol | 10-HDoHE | 60 | 3.28 (1.1, 9.82)    | 2.95 (0.98, 8.82)  | -10% (-92, 900)   | >0.80 |
| NEOx       | Cell  | DHA | Alcohol | 10-HDoHE | 0  | 1.16 (0.61, 2.21)   | 0.72 (0.38, 1.37)  | -38% (-84, 139)   | >0.80 |
| NEOx       | Cell  | DHA | Alcohol | 10-HDoHE | 15 | 0.81 (0.48, 1.39)   | 0.57 (0.34, 0.98)  | -30% (-75, 100)   | >0.80 |
| NEOx       | Cell  | DHA | Alcohol | 10-HDoHE | 30 | 0.7 (0.4, 1.22)     | 0.56 (0.32, 0.97)  | -20% (-70, 111)   | >0.80 |
| NEOx       | Cell  | DHA | Alcohol | 10-HDoHE | 60 | 0.98 (0.49, 1.96)   | 1 (0.5, 1.99)      | 1% (-78, 375)     | >0.80 |
| Esterified | Media | DHA | Alcohol | 10-HDoHE | 0  | 0.67 (0.36, 1.26)   | 0.71 (0.38, 1.34)  | 7% (-71, 294)     | >0.80 |
| Esterified | Media | DHA | Alcohol | 10-HDoHE | 15 | 0.62 (0.34, 1.11)   | 0.6 (0.33, 1.08)   | -2% (-68, 197)    | >0.80 |
| Esterified | Media | DHA | Alcohol | 10-HDoHE | 30 | 0.64 (0.36, 1.16)   | 0.57 (0.32, 1.04)  | -11% (-69, 161)   | >0.80 |
| Esterified | Media | DHA | Alcohol | 10-HDoHE | 60 | 1.02 (0.53, 1.96)   | 0.76 (0.4, 1.47)   | -25% (-82, 219)   | >0.80 |
| NEOx       | Media | DHA | Alcohol | 10-HDoHE | 0  | 0.65 (0.38, 1.13)   | 0.72 (0.42, 1.25)  | 11% (-64, 245)    | >0.80 |
| NEOx       | Media | DHA | Alcohol | 10-HDoHE | 15 | 0.64 (0.38, 1.05)   | 0.64 (0.39, 1.06)  | 1% (-61, 163)     | >0.80 |
| NEOx       | Media | DHA | Alcohol | 10-HDoHE | 30 | 0.6 (0.36, 0.99)    | 0.55 (0.33, 0.91)  | -8% (-64, 130)    | >0.80 |
| NEOx       | Media | DHA | Alcohol | 10-HDoHE | 60 | 0.48 (0.27, 0.84)   | 0.36 (0.2, 0.64)   | -24% (-78, 166)   | >0.80 |
| Esterified | Cell  | DHA | Alcohol | 13-HDoHE | 0  | 0.73 (0.39, 1.35)   | 0.69 (0.37, 1.28)  | -5% (-74, 249)    | >0.80 |
| Esterified | Cell  | DHA | Alcohol | 13-HDoHE | 15 | 1.2 (0.71, 2.03)    | 1.13 (0.67, 1.91)  | -6% (-66, 161)    | >0.80 |
| Esterified | Cell  | DHA | Alcohol | 13-HDoHE | 30 | 1.74 (1.02, 2.99)   | 1.64 (0.95, 2.81)  | -6% (-64, 143)    | >0.80 |
| Esterified | Cell  | DHA | Alcohol | 13-HDoHE | 60 | 2.48 (1.28, 4.81)   | 2.29 (1.18, 4.45)  | -7% (-79, 310)    | >0.80 |
| NEOx       | Cell  | DHA | Alcohol | 13-HDoHE | 0  | 0.61 (0.36, 1.03)   | 0.41 (0.25, 0.69)  | -33% (-77, 97)    | >0.80 |
| NEOx       | Cell  | DHA | Alcohol | 13-HDoHE | 15 | 0.61 (0.38, 1)      | 0.44 (0.27, 0.72)  | -28% (-72, 82)    | >0.80 |
| NEOx       | Cell  | DHA | Alcohol | 13-HDoHE | 30 | 0.64 (0.39, 1.04)   | 0.49 (0.3, 0.8)    | -23% (-69, 88)    | >0.80 |
| NEOx       | Cell  | DHA | Alcohol | 13-HDoHE | 60 | 0.76 (0.44, 1.3)    | 0.66 (0.39, 1.13)  | -13% (-73, 183)   | >0.80 |
| Esterified | Media | DHA | Alcohol | 13-HDoHE | 0  | 0.65 (0.4, 1.05)    | 0.56 (0.34, 0.92)  | -13% (-68, 134)   | >0.80 |
| Esterified | Media | DHA | Alcohol | 13-HDoHE | 15 | 0.69 (0.42, 1.12)   | 0.57 (0.35, 0.93)  | -17% (-66, 104)   | >0.80 |
| Esterified | Media | DHA | Alcohol | 13-HDoHE | 30 | 0.73 (0.45, 1.18)   | 0.58 (0.36, 0.93)  | -21% (-67, 92)    | >0.80 |
| Esterified | Media | DHA | Alcohol | 13-HDoHE | 60 | 0.76 (0.46, 1.25)   | 0.55 (0.33, 0.91)  | -28% (-75, 108)   | >0.80 |
| NEOx       | Media | DHA | Alcohol | 13-HDoHE | 0  | 0.68 (0.43, 1.06)   | 0.57 (0.36, 0.88)  | -17% (-66, 107)   | >0.80 |
| NEOx       | Media | DHA | Alcohol | 13-HDoHE | 15 | 0.54 (0.35, 0.83)   | 0.45 (0.29, 0.69)  | -16% (-63, 88)    | >0.80 |
| NEOx       | Media | DHA | Alcohol | 13-HDoHE | 30 | 0.48 (0.31, 0.75)   | 0.4 (0.26, 0.62)   | -16% (-62, 85)    | >0.80 |
| NEOx       | Media | DHA | Alcohol | 13-HDoHE | 60 | 0.56 (0.36, 0.89)   | 0.47 (0.3, 0.75)   | -16% (-68, 125)   | >0.80 |
| Esterified | Cell  | DHA | Alcohol | 14-HDoHE | 0  | 2.2 (0.83, 5.79)    | 1.29 (0.49, 3.41)  | -41% (-92, 347)   | >0.80 |
| Esterified | Cell  | DHA | Alcohol | 14-HDoHE | 15 | 2.68 (1.24, 5.8)    | 1.61 (0.74, 3.49)  | -40% (-87, 177)   | >0.80 |
| Esterified | Cell  | DHA | Alcohol | 14-HDoHE | 30 | 3.52 (1.56, 7.94)   | 2.16 (0.96, 4.87)  | -39% (-85, 150)   | >0.80 |
| Esterified | Cell  | DHA | Alcohol | 14-HDoHE | 60 | 7.6 (2.67, 21.65)   | 4.86 (1.71, 13.86) | -36% (-94, 574)   | >0.80 |
| NEOx       | Cell  | DHA | Alcohol | 14-HDoHE | 0  | 0.42 (0.22, 0.81)   | 0.37 (0.19, 0.71)  | -12% (-78, 248)   | >0.80 |
| NEOx       | Cell  | DHA | Alcohol | 14-HDoHE | 15 | 0.41 (0.22, 0.76)   | 0.34 (0.18, 0.62)  | -19% (-75, 160)   | >0.80 |
| NEOx       | Cell  | DHA | Alcohol | 14-HDoHE | 30 | 0.44 (0.24, 0.81)   | 0.33 (0.18, 0.61)  | -25% (-75, 129)   | >0.80 |
| NEOx       | Cell  | DHA | Alcohol | 14-HDoHE | 60 | 0.64 (0.32, 1.27)   | 0.41 (0.2, 0.81)   | -36% (-86, 192)   | >0.80 |
| Esterified | Media | DHA | Alcohol | 14-HDoHE | 0  | 0.42 (0.23, 0.78)   | 0.42 (0.23, 0.78)  | -1% (-73, 259)    | >0.80 |
| Esterified | Media | DHA | Alcohol | 14-HDoHE | 15 | 0.5 (0.29, 0.85)    | 0.5 (0.29, 0.85)   | 0% (-65, 183)     | >0.80 |
| Esterified | Media | DHA | Alcohol | 14-HDoHE | 30 | 0.54 (0.31, 0.94)   | 0.55 (0.32, 0.95)  | 1% (-62, 170)     | >0.80 |
| Esterified | Media | DHA | Alcohol | 14-HDoHE | 60 | 0.52 (0.27, 1)      | 0.54 (0.28, 1.03)  | 2% (-76, 337)     | >0.80 |
| NEOx       | Media | DHA | Alcohol | 14-HDoHE | 0  | 0.57 (0.3, 1.08)    | 0.49 (0.26, 0.94)  | -13% (-76, 221)   | >0.80 |
| NEOx       | Media | DHA | Alcohol | 14-HDoHE | 15 | 0.41 (0.22, 0.79)   | 0.4 (0.21, 0.77)   | -2% (-70, 220)    | >0.80 |
| NEOx       | Media | DHA | Alcohol | 14-HDoHE | 30 | 0.35 (0.19, 0.67)   | 0.38 (0.2, 0.73)   | 9% (-66, 249)     | >0.80 |
| NEOx       | Media | DHA | Alcohol | 14-HDoHE | 60 | 0.39 (0.2, 0.75)    | 0.53 (0.28, 1.02)  | 36% (-66, 445)    | >0.80 |
| Esterified | Cell  | DHA | Alcohol | 17-HDoHE | 0  | 3.31 (1.19, 9.18)   | 5.75 (2.07, 15.96) | 74% (-80, 1379)   | >0.80 |
| Esterified | Cell  | DHA | Alcohol | 17-HDoHE | 15 | 2.93 (1.27, 6.75)   | 3.92 (1.7, 9.04)   | 34% (-74, 591)    | >0.80 |
| Esterified | Cell  | DHA | Alcohol | 17-HDoHE | 30 | 3.5 (1.46, 8.37)    | 3.61 (1.51, 8.62)  | 3% (-77, 372)     | >0.80 |
| Esterified | Cell  | DHA | Alcohol | 17-HDoHE | 60 | 12.28 (4.09, 36.85) | 7.5 (2.5, 22.5)    | -39% (-95, 621)   | >0.80 |
| NEOx       | Cell  | DHA | Alcohol | 17-HDoHE | 0  | 1.18 (0.69, 2.02)   | 0.73 (0.43, 1.24)  | -38% (-79, 84)    | 0.78  |
| NEOx       | Cell  | DHA | Alcohol | 17-HDoHE | 15 | 1.09 (0.65, 1.82)   | 0.67 (0.4, 1.12)   | -39% (-77, 62)    | 0.65  |
| NEOx       | Cell  | DHA | Alcohol | 17-HDoHE | 30 | 1.03 (0.61, 1.72)   | 0.63 (0.37, 1.05)  | -39% (-76, 57)    | 0.61  |
| NEOx       | Cell  | DHA | Alcohol | 17-HDoHE | 60 | 1 (0.58, 1.72)      | 0.6 (0.35, 1.04)   | -40% (-82, 98)    | >0.80 |
| Esterified | Media | DHA | Alcohol | 17-HDoHE | 0  | 0.92 (0.38, 2.24)   | 1.21 (0.5, 2.94)   | 31% (-76, 628)    | >0.80 |
| Esterified | Media | DHA | Alcohol | 17-HDoHE | 15 | 0.81 (0.33, 2)      | 0.98 (0.4, 2.4)    | 20% (-76, 514)    | >0.80 |
| Esterified | Media | DHA | Alcohol | 17-HDoHE | 30 | 0.83 (0.34, 2.03)   | 0.92 (0.38, 2.24)  | 10% (-78, 453)    | >0.80 |
| Esterified | Media | DHA | Alcohol | 17-HDoHE | 60 | 1.35 (0.56, 3.28)   | 1.25 (0.51, 3.03)  | -8% (-84, 446)    | >0.80 |
| NEOx       | Media | DHA | Alcohol | 17-HDoHE | 0  | 0.83 (0.43, 1.62)   | 0.76 (0.39, 1.49)  | -8% (-77, 262)    | >0.80 |
| NEOx       | Media | DHA | Alcohol | 17-HDoHE | 15 | 0.76 (0.4, 1.45)    | 0.73 (0.38, 1.4)   | -3% (-71, 225)    | >0.80 |
| NEOx       | Media | DHA | Alcohol | 17-HDoHE | 30 | 0.72 (0.38, 1.38)   | 0.73 (0.38, 1.4)   | 1% (-69, 230)     | >0.80 |
| NEOx       | Media | DHA | Alcohol | 17-HDoHE | 60 | 0.76 (0.38, 1.51)   | 0.85 (0.43, 1.69)  | 12% (-75, 393)    | >0.80 |
| Esterified | Cell  | LA  | Ketone  | 9-KODE   | 0  | 1.95 (0.68, 5.61)   | 2.38 (0.83, 6.84)  | 22% (-86, 1001)   | >0.80 |
| Esterified | Cell  | LA  | Ketone  | 9-KODE   | 15 | 2.18 (0.98, 4.86)   | 2.39 (1.07, 5.33)  | 10% (-78, 441)    | >0.80 |
| Esterified | Cell  | LA  | Ketone  | 9-KODE   | 30 | 2.64 (1.12, 6.24)   | 2.61 (1.1, 6.15)   | -1% (-77, 319)    | >0.80 |
| Esterified | Cell  | LA  | Ketone  | 9-KODE   | 60 | 5 (1.59, 15.78)     | 3.99 (1.26, 12.59) | -20% (-94, 957)   | >0.80 |
| NEOx       | Cell  | LA  | Ketone  | 9-KODE   | 0  | 0.54 (0.09, 3.35)   | 0.32 (0.05, 1.97)  | -41% (-99, 2548)  | >0.80 |
| NEOx       | Cell  | LA  | Ketone  | 9-KODE   | 15 | 0.37 (0.09, 1.55)   | 0.36 (0.09, 1.52)  | -2% (-94, 1595)   | >0.80 |
| NEOx       | Cell  | LA  | Ketone  | 9-KODE   | 30 | 0.21 (0.05, 0.96)   | 0.34 (0.08, 1.58)  | 64% (-88, 2139)   | >0.80 |
| NEOx       | Cell  | LA  | Ketone  | 9-KODE   | 60 | 0.04 (0.01, 0.31)   | 0.2 (0.03, 1.41)   | 356% (-95, 37951) | >0.80 |
| Esterified | Media | LA  | Ketone  | 9-KODE   | 0  | 0.26 (0.09, 0.72)   | 0.33 (0.12, 0.9)   | 25% (-85, 960)    | >0.80 |
| Esterified | Media | LA  | Ketone  | 9-KODE   | 15 | 0.34 (0.14, 0.83)   | 0.36 (0.15, 0.9)   | 8% (-81, 521)     | >0.80 |
| Esterified | Media | LA  | Ketone  | 9-KODE   | 30 | 0.42 (0.17, 1.07)   | 0.39 (0.16, 0.99)  | -7% (-82, 389)    | >0.80 |
| Esterified | Media | LA  | Ketone  | 9-KODE   | 60 | 0.63 (0.21, 1.84)   | 0.43 (0.15, 1.26)  | -32% (-94, 654)   | >0.80 |
| NEOx       | Media | LA  | Ketone  | 9-KODE   | 0  | 0.08 (0.01, 0.47)   | 0.09 (0.02, 0.58)  | 23% (-97, 5197)   | >0.80 |
| NEOx       | Media | LA  | Ketone  | 9-KODE   | 15 | 0.21 (0.06, 0.76)   | 0.23 (0.06, 0.84)  | 10% (-92, 1358)   | >0.80 |
| NEOx       | Media | LA  | Ketone  | 9-KODE   | 30 | 0.4 (0.1, 1.65)     | 0.39 (0.1, 1.63)   | -1% (-90, 860)    | >0.80 |
| NEOx       | Media | LA  | Ketone  | 9-KODE   | 60 | 0.5 (0.07, 3.67)    | 0.39 (0.05, 2.92)  | -20% (-99, 6975)  | >0.80 |
| Esterified | Cell  | LA  | Ketone  | 13-KODE  | 0  | 4.24 (1.32, 13.59)  | 4.02 (1.26, 12.89) | -5% (-91, 870)    | >0.80 |
| Esterified | Cell  | LA  | Ketone  | 13-KODE  | 15 | 6.83 (3.55, 13.15)  | 6.12 (3.18, 11.77) | -10% (-75, 226)   | >0.80 |
| Esterified | Cell  | LA  | Ketone  | 13-KODE  | 30 | 8.08 (3.6, 18.14)   | 6.83 (3.04, 15.32) | -16% (-68, 121)   | >0.80 |

|                  |    |          |           |    |                    |                    |       |                   |       |
|------------------|----|----------|-----------|----|--------------------|--------------------|-------|-------------------|-------|
| Esterified Cell  | LA | Ketone   | 13-KODE   | 60 | 4.48 (1.21, 16.61) | 3.37 (0.91, 12.5)  |       | -25% (-96, 1265)  | >0.80 |
| NEOx Cell        | LA | Ketone   | 13-KODE   | 0  | 1.6 (0.69, 3.71)   | 2.41 (1.04, 5.58)  | 0.06  | 50% (-72, 708)    | >0.80 |
| NEOx Cell        | LA | Ketone   | 13-KODE   | 15 | 1.46 (0.9, 2.35)   | 1.32 (0.82, 2.13)  |       | -9% (-65, 135)    | >0.80 |
| NEOx Cell        | LA | Ketone   | 13-KODE   | 30 | 1.86 (1.04, 3.35)  | 1.02 (0.57, 1.83)  |       | -45% (-73, 12)    | 0.13  |
| NEOx Cell        | LA | Ketone   | 13-KODE   | 60 | 8.55 (3.33, 21.97) | 1.69 (0.66, 4.35)  |       | -80% (-98, 60)    | 0.19  |
| Esterified Media | LA | Ketone   | 13-KODE   | 0  | 1.12 (0.44, 2.87)  | 1.04 (0.41, 2.68)  | 0.06  | -7% (-87, 561)    | >0.80 |
| Esterified Media | LA | Ketone   | 13-KODE   | 15 | 1.86 (0.94, 3.69)  | 1.04 (0.53, 2.07)  |       | -44% (-86, 121)   | >0.80 |
| Esterified Media | LA | Ketone   | 13-KODE   | 30 | 3.01 (1.42, 6.35)  | 1.02 (0.48, 2.15)  |       | -66% (-90, 15)    | 0.1   |
| Esterified Media | LA | Ketone   | 13-KODE   | 60 | 7.21 (2.56, 20.29) | 0.89 (0.31, 2.49)  |       | -88% (-99, 26)    | 0.09  |
| NEOx Media       | LA | Ketone   | 13-KODE   | 0  | 1.9 (0.69, 5.19)   | 1.77 (0.65, 4.83)  | 0.69  | -7% (-89, 659)    | >0.80 |
| NEOx Media       | LA | Ketone   | 13-KODE   | 15 | 1.13 (0.53, 2.42)  | 0.95 (0.44, 2.03)  |       | -16% (-82, 281)   | >0.80 |
| NEOx Media       | LA | Ketone   | 13-KODE   | 30 | 0.98 (0.43, 2.22)  | 0.74 (0.33, 1.67)  |       | -25% (-81, 195)   | >0.80 |
| NEOx Media       | LA | Ketone   | 13-KODE   | 60 | 2.25 (0.75, 6.74)  | 1.36 (0.46, 4.09)  |       | -39% (-95, 616)   | >0.80 |
| Esterified Cell  | AA | Ketone   | 5-KETE    | 0  | 1.71 (0.58, 5.02)  | 0.67 (0.23, 1.97)  | 0.38  | -61% (-96, 259)   | >0.80 |
| Esterified Cell  | AA | Ketone   | 5-KETE    | 15 | 2.6 (1.27, 5.32)   | 1.34 (0.66, 2.74)  |       | -48% (-88, 117)   | 0.74  |
| Esterified Cell  | AA | Ketone   | 5-KETE    | 30 | 3.52 (1.56, 7.91)  | 2.38 (1.06, 5.36)  |       | -32% (-80, 130)   | >0.80 |
| Esterified Cell  | AA | Ketone   | 5-KETE    | 60 | 4.46 (1.35, 14.78) | 5.22 (1.58, 17.28) |       | 17% (-92, 1603)   | >0.80 |
| NEOx Cell        | AA | Ketone   | 5-KETE    | 0  | 0.76 (0.14, 4)     | 0.59 (0.11, 3.11)  | 0.57  | -22% (-97, 2309)  | >0.80 |
| NEOx Cell        | AA | Ketone   | 5-KETE    | 15 | 0.57 (0.18, 1.77)  | 0.34 (0.11, 1.05)  |       | -41% (-94, 485)   | >0.80 |
| NEOx Cell        | AA | Ketone   | 5-KETE    | 30 | 0.63 (0.18, 2.25)  | 0.29 (0.08, 1.02)  |       | -55% (-94, 228)   | >0.80 |
| NEOx Cell        | AA | Ketone   | 5-KETE    | 60 | 2.54 (0.4, 16.02)  | 0.67 (0.11, 4.23)  |       | -74% (-100, 1538) | >0.80 |
| Esterified Media | AA | Ketone   | 5-KETE    | 0  | 0.33 (0.07, 1.6)   | 0.85 (0.17, 4.2)   | 0.39  | 162% (-91, 7203)  | >0.80 |
| Esterified Media | AA | Ketone   | 5-KETE    | 15 | 0.55 (0.16, 1.9)   | 1 (0.29, 3.45)     |       | 82% (-84, 2000)   | >0.80 |
| Esterified Media | AA | Ketone   | 5-KETE    | 30 | 0.89 (0.24, 3.3)   | 1.12 (0.3, 4.17)   |       | 26% (-86, 1074)   | >0.80 |
| Esterified Media | AA | Ketone   | 5-KETE    | 60 | 1.95 (0.35, 11.04) | 1.19 (0.21, 6.73)  |       | -39% (-99, 2892)  | >0.80 |
| NEOx Media       | AA | Ketone   | 5-KETE    | 0  | 1.26 (0.41, 3.86)  | 1.57 (0.51, 4.8)   | 0.65  | 24% (-88, 1133)   | >0.80 |
| NEOx Media       | AA | Ketone   | 5-KETE    | 15 | 0.7 (0.33, 1.46)   | 1 (0.48, 2.1)      |       | 44% (-68, 540)    | >0.80 |
| NEOx Media       | AA | Ketone   | 5-KETE    | 30 | 0.48 (0.21, 1.11)  | 0.79 (0.34, 1.84)  |       | 66% (-54, 494)    | >0.80 |
| NEOx Media       | AA | Ketone   | 5-KETE    | 60 | 0.44 (0.13, 1.51)  | 0.97 (0.28, 3.35)  |       | 122% (-86, 3467)  | >0.80 |
| Esterified Cell  | AA | Ketone   | 12-KETE   | 0  | 0.45 (0.13, 1.52)  | 0.56 (0.17, 1.9)   | 0.71  | 25% (-90, 1488)   | >0.80 |
| Esterified Cell  | AA | Ketone   | 12-KETE   | 15 | 0.55 (0.21, 1.44)  | 0.62 (0.23, 1.61)  |       | 12% (-83, 650)    | >0.80 |
| Esterified Cell  | AA | Ketone   | 12-KETE   | 30 | 0.82 (0.3, 2.27)   | 0.82 (0.3, 2.26)   |       | 0% (-83, 473)     | >0.80 |
| Esterified Cell  | AA | Ketone   | 12-KETE   | 60 | 3.32 (0.89, 12.34) | 2.64 (0.71, 9.8)   |       | -21% (-96, 1422)  | >0.80 |
| NEOx Cell        | AA | Ketone   | 12-KETE   | 0  | 0.82 (0.25, 2.7)   | 0.19 (0.06, 0.61)  | 0.73  | -77% (-98, 160)   | 0.44  |
| NEOx Cell        | AA | Ketone   | 12-KETE   | 15 | 0.53 (0.24, 1.2)   | 0.13 (0.06, 0.3)   |       | -75% (-95, 30)    | 0.13  |
| NEOx Cell        | AA | Ketone   | 12-KETE   | 30 | 0.45 (0.18, 1.12)  | 0.13 (0.05, 0.32)  |       | -72% (-93, 18)    | 0.1   |
| NEOx Cell        | AA | Ketone   | 12-KETE   | 60 | 0.73 (0.2, 2.71)   | 0.26 (0.07, 0.97)  |       | -64% (-98, 578)   | >0.80 |
| Esterified Media | AA | Ketone   | 12-KETE   | 0  | 0.41 (0.17, 0.98)  | 0.45 (0.19, 1.09)  | >0.80 | 11% (-81, 558)    | >0.80 |
| Esterified Media | AA | Ketone   | 12-KETE   | 15 | 0.28 (0.16, 0.47)  | 0.3 (0.18, 0.52)   |       | 10% (-63, 222)    | >0.80 |
| Esterified Media | AA | Ketone   | 12-KETE   | 30 | 0.23 (0.12, 0.43)  | 0.25 (0.13, 0.47)  |       | 9% (-54, 159)     | >0.80 |
| Esterified Media | AA | Ketone   | 12-KETE   | 60 | 0.31 (0.11, 0.82)  | 0.33 (0.12, 0.87)  |       | 7% (-88, 851)     | >0.80 |
| NEOx Media       | AA | Ketone   | 12-KETE   | 0  | 0.23 (0.1, 0.57)   | 0.45 (0.18, 1.1)   | >0.80 | 91% (-70, 1099)   | >0.80 |
| NEOx Media       | AA | Ketone   | 12-KETE   | 15 | 0.17 (0.09, 0.3)   | 0.31 (0.17, 0.57)  |       | 86% (-44, 513)    | 0.63  |
| NEOx Media       | AA | Ketone   | 12-KETE   | 30 | 0.17 (0.09, 0.33)  | 0.3 (0.15, 0.59)   |       | 80% (-35, 400)    | 0.5   |
| NEOx Media       | AA | Ketone   | 12-KETE   | 60 | 0.46 (0.17, 1.23)  | 0.77 (0.29, 2.09)  |       | 70% (-82, 1467)   | >0.80 |
| Esterified Cell  | AA | Ketone   | 15-KETE   | 0  | 0.15 (0.03, 0.65)  | 0.4 (0.09, 1.78)   | 0.49  | 173% (-88, 6157)  | >0.80 |
| Esterified Cell  | AA | Ketone   | 15-KETE   | 15 | 0.21 (0.05, 0.84)  | 0.46 (0.12, 1.85)  |       | 120% (-84, 2980)  | >0.80 |
| Esterified Cell  | AA | Ketone   | 15-KETE   | 30 | 0.3 (0.08, 1.23)   | 0.54 (0.13, 2.18)  |       | 78% (-86, 2125)   | >0.80 |
| Esterified Cell  | AA | Ketone   | 15-KETE   | 60 | 0.63 (0.13, 3.04)  | 0.73 (0.15, 3.51)  |       | 16% (-96, 3641)   | >0.80 |
| NEOx Cell        | AA | Ketone   | 15-KETE   | 0  | 0.08 (0.02, 0.3)   | 0.05 (0.01, 0.16)  | 0.52  | -46% (-96, 642)   | >0.80 |
| NEOx Cell        | AA | Ketone   | 15-KETE   | 15 | 0.08 (0.03, 0.21)  | 0.03 (0.01, 0.09)  |       | -56% (-94, 198)   | 0.79  |
| NEOx Cell        | AA | Ketone   | 15-KETE   | 30 | 0.09 (0.03, 0.26)  | 0.03 (0.01, 0.09)  |       | -65% (-94, 103)   | 0.47  |
| NEOx Cell        | AA | Ketone   | 15-KETE   | 60 | 0.26 (0.07, 1.02)  | 0.06 (0.02, 0.24)  |       | -77% (-99, 401)   | 0.71  |
| Esterified Media | AA | Ketone   | 15-KETE   | 0  | 0.12 (0.04, 0.37)  | 0.07 (0.02, 0.22)  | 0.23  | -42% (-95, 537)   | >0.80 |
| Esterified Media | AA | Ketone   | 15-KETE   | 15 | 0.08 (0.03, 0.19)  | 0.07 (0.03, 0.16)  |       | -16% (-85, 377)   | >0.80 |
| Esterified Media | AA | Ketone   | 15-KETE   | 30 | 0.07 (0.03, 0.17)  | 0.08 (0.03, 0.21)  |       | 23% (-74, 488)    | >0.80 |
| Esterified Media | AA | Ketone   | 15-KETE   | 60 | 0.08 (0.02, 0.28)  | 0.21 (0.06, 0.72)  |       | 160% (-85, 4252)  | >0.80 |
| NEOx Media       | AA | Ketone   | 15-KETE   | 0  | 0.1 (0.03, 0.32)   | 0.03 (0.01, 0.08)  | 0.21  | -74% (-98, 185)   | 0.53  |
| NEOx Media       | AA | Ketone   | 15-KETE   | 15 | 0.11 (0.04, 0.26)  | 0.04 (0.02, 0.1)   |       | -62% (-94, 122)   | 0.56  |
| NEOx Media       | AA | Ketone   | 15-KETE   | 30 | 0.11 (0.04, 0.28)  | 0.06 (0.02, 0.15)  |       | -45% (-89, 179)   | >0.80 |
| NEOx Media       | AA | Ketone   | 15-KETE   | 60 | 0.1 (0.03, 0.35)   | 0.12 (0.03, 0.41)  |       | 18% (-93, 1860)   | >0.80 |
| Esterified Cell  | AA | Peroxide | 12-HpPETE | 0  | 0.33 (0.12, 0.89)  | 0.38 (0.14, 1.04)  | 0.61  | 17% (-85, 818)    | >0.80 |
| Esterified Cell  | AA | Peroxide | 12-HpPETE | 15 | 0.39 (0.19, 0.81)  | 0.4 (0.19, 0.82)   |       | 2% (-76, 339)     | >0.80 |
| Esterified Cell  | AA | Peroxide | 12-HpPETE | 30 | 0.46 (0.21, 1.02)  | 0.41 (0.19, 0.9)   |       | -11% (-76, 229)   | >0.80 |
| Esterified Cell  | AA | Peroxide | 12-HpPETE | 60 | 0.65 (0.22, 1.91)  | 0.44 (0.15, 1.3)   |       | -32% (-94, 676)   | >0.80 |
| NEOx Cell        | AA | Peroxide | 12-HpPETE | 0  | 0.33 (0.16, 0.71)  | 0.24 (0.11, 0.52)  | 0.56  | -28% (-85, 258)   | >0.80 |
| NEOx Cell        | AA | Peroxide | 12-HpPETE | 15 | 0.34 (0.17, 0.66)  | 0.22 (0.11, 0.43)  |       | -35% (-82, 139)   | >0.80 |
| NEOx Cell        | AA | Peroxide | 12-HpPETE | 30 | 0.38 (0.19, 0.75)  | 0.22 (0.11, 0.44)  |       | -41% (-83, 101)   | 0.8   |
| NEOx Cell        | AA | Peroxide | 12-HpPETE | 60 | 0.64 (0.29, 1.45)  | 0.31 (0.14, 0.7)   |       | -52% (-92, 194)   | >0.80 |
| Esterified Media | AA | Peroxide | 12-HpPETE | 0  | 0.17 (0.07, 0.41)  | 0.29 (0.12, 0.7)   | 0.46  | 71% (-72, 958)    | >0.80 |
| Esterified Media | AA | Peroxide | 12-HpPETE | 15 | 0.25 (0.12, 0.53)  | 0.37 (0.17, 0.79)  |       | 47% (-66, 536)    | >0.80 |
| Esterified Media | AA | Peroxide | 12-HpPETE | 30 | 0.32 (0.15, 0.69)  | 0.4 (0.19, 0.87)   |       | 27% (-68, 404)    | >0.80 |
| Esterified Media | AA | Peroxide | 12-HpPETE | 60 | 0.32 (0.13, 0.81)  | 0.3 (0.12, 0.76)   |       | -6% (-88, 646)    | >0.80 |
| NEOx Media       | AA | Peroxide | 12-HpPETE | 0  | 0.23 (0.14, 0.4)   | 0.35 (0.21, 0.61)  | 0.7   | 52% (-50, 361)    | >0.80 |
| NEOx Media       | AA | Peroxide | 12-HpPETE | 15 | 0.21 (0.15, 0.3)   | 0.3 (0.21, 0.43)   |       | 43% (-30, 192)    | 0.65  |
| NEOx Media       | AA | Peroxide | 12-HpPETE | 30 | 0.21 (0.14, 0.31)  | 0.28 (0.19, 0.42)  |       | 35% (-26, 146)    | 0.66  |
| NEOx Media       | AA | Peroxide | 12-HpPETE | 60 | 0.25 (0.14, 0.46)  | 0.3 (0.16, 0.55)   |       | 20% (-69, 360)    | >0.80 |
| Esterified Cell  | AA | Peroxide | 15-HpPETE | 0  | 3.27 (1.34, 7.97)  | 3.03 (1.24, 7.4)   | 0.36  | -7% (-84, 453)    | >0.80 |
| Esterified Cell  | AA | Peroxide | 15-HpPETE | 15 | 3.1 (1.28, 7.55)   | 2.55 (1.05, 6.21)  |       | -18% (-84, 324)   | >0.80 |
| Esterified Cell  | AA | Peroxide | 15-HpPETE | 30 | 3.17 (1.31, 7.68)  | 2.31 (0.96, 5.6)   |       | -27% (-85, 265)   | >0.80 |
| Esterified Cell  | AA | Peroxide | 15-HpPETE | 60 | 4.16 (1.69, 10.24) | 2.38 (0.97, 5.87)  |       | -43% (-91, 280)   | >0.80 |
| NEOx Cell        | AA | Peroxide | 15-HpPETE | 0  | 2.42 (1.22, 4.8)   | 1.3 (0.66, 2.59)   | >0.80 | -46% (-87, 120)   | 0.78  |
| NEOx Cell        | AA | Peroxide | 15-HpPETE | 15 | 2.78 (1.78, 4.32)  | 1.53 (0.98, 2.38)  |       | -45% (-77, 34)    | 0.34  |
| NEOx Cell        | AA | Peroxide | 15-HpPETE | 30 | 2.83 (1.7, 4.71)   | 1.59 (0.95, 2.64)  |       | -44% (-73, 19)    | 0.2   |
| NEOx Cell        | AA | Peroxide | 15-HpPETE | 60 | 2.05 (0.95, 4.39)  | 1.19 (0.56, 2.56)  |       | -42% (-89, 221)   | >0.80 |

|            |       |     |          |               |    |                       |                       |       |                 |       |
|------------|-------|-----|----------|---------------|----|-----------------------|-----------------------|-------|-----------------|-------|
| Esterified | Media | AA  | Peroxide | 15-HpETE      | 0  | 2.75 (0.8, 9.44)      | 2.45 (0.71, 8.38)     | 0.6   | -11% (-93, 957) | >0.80 |
| Esterified | Media | AA  | Peroxide | 15-HpETE      | 15 | 1.96 (0.58, 6.67)     | 1.58 (0.46, 5.38)     |       | -19% (-92, 677) | >0.80 |
| Esterified | Media | AA  | Peroxide | 15-HpETE      | 30 | 1.74 (0.51, 5.88)     | 1.27 (0.38, 4.31)     |       | -27% (-92, 575) | >0.80 |
| Esterified | Media | AA  | Peroxide | 15-HpETE      | 60 | 2.64 (0.76, 9.22)     | 1.6 (0.46, 5.57)      |       | -40% (-96, 741) | >0.80 |
| NEOx       | Media | AA  | Peroxide | 15-HpETE      | 0  | 2.89 (1.05, 7.94)     | 1.38 (0.5, 3.8)       | 0.6   | -52% (-94, 279) | >0.80 |
| NEOx       | Media | AA  | Peroxide | 15-HpETE      | 15 | 2.71 (1.01, 7.25)     | 1.42 (0.53, 3.8)      |       | -48% (-92, 231) | >0.80 |
| NEOx       | Media | AA  | Peroxide | 15-HpETE      | 30 | 2.55 (0.95, 6.8)      | 1.46 (0.55, 3.91)     |       | -43% (-90, 245) | >0.80 |
| NEOx       | Media | AA  | Peroxide | 15-HpETE      | 60 | 2.26 (0.8, 6.38)      | 1.56 (0.55, 4.4)      |       | -31% (-93, 546) | >0.80 |
| Esterified | Cell  | DHA | Triol    | Resolvin D1   | 0  | 90 (31, 260)          | 42 (15, 121)          | 0.64  | -54% (-95, 323) | >0.80 |
| Esterified | Cell  | DHA | Triol    | Resolvin D1   | 15 | 106 (41, 272)         | 55 (21, 141)          |       | -48% (-92, 218) | >0.80 |
| Esterified | Cell  | DHA | Triol    | Resolvin D1   | 30 | 112 (43, 291)         | 64 (25, 168)          |       | -42% (-90, 224) | >0.80 |
| Esterified | Cell  | DHA | Triol    | Resolvin D1   | 60 | 89 (29, 272)          | 64 (21, 194)          |       | -28% (-94, 757) | >0.80 |
| NEOx       | Cell  | DHA | Triol    | Resolvin D1   | 0  | 53.47 (16.76, 170.54) | 55.79 (17.49, 177.94) | >0.80 | 4% (-91, 1070)  | >0.80 |
| NEOx       | Cell  | DHA | Triol    | Resolvin D1   | 15 | 51.01 (17.53, 148.46) | 54.05 (18.57, 157.3)  |       | 6% (-86, 714)   | >0.80 |
| NEOx       | Cell  | DHA | Triol    | Resolvin D1   | 30 | 45.91 (15.63, 134.88) | 49.4 (16.82, 145.13)  |       | 8% (-85, 660)   | >0.80 |
| NEOx       | Cell  | DHA | Triol    | Resolvin D1   | 60 | 31.24 (9.29, 105.04)  | 34.67 (10.31, 116.55) |       | 11% (-92, 1520) | >0.80 |
| Esterified | Media | DHA | Triol    | Resolvin D1   | 0  | 48.47 (12.42, 189.16) | 55.97 (14.34, 218.42) | >0.80 | 15% (-93, 1790) | >0.80 |
| Esterified | Media | DHA | Triol    | Resolvin D1   | 15 | 36.87 (9.89, 137.39)  | 41.21 (11.06, 153.59) |       | 12% (-91, 1220) | >0.80 |
| Esterified | Media | DHA | Triol    | Resolvin D1   | 30 | 33.46 (8.99, 124.5)   | 36.21 (9.73, 134.73)  |       | 8% (-90, 1091)  | >0.80 |
| Esterified | Media | DHA | Triol    | Resolvin D1   | 60 | 46.83 (11.55, 189.85) | 47.5 (11.72, 192.56)  |       | 1% (-95, 2002)  | >0.80 |
| NEOx       | Media | DHA | Triol    | Resolvin D1   | 0  | 76.73 (32.62, 180.48) | 55.99 (23.8, 131.69)  | 0.59  | -27% (-88, 339) | >0.80 |
| NEOx       | Media | DHA | Triol    | Resolvin D1   | 15 | 67.45 (32.41, 140.35) | 44.21 (21.25, 92)     |       | -34% (-84, 173) | >0.80 |
| NEOx       | Media | DHA | Triol    | Resolvin D1   | 30 | 57.66 (27.14, 122.5)  | 33.96 (15.98, 72.14)  |       | -41% (-85, 125) | >0.80 |
| NEOx       | Media | DHA | Triol    | Resolvin D1   | 60 | 38.76 (15.58, 96.44)  | 18.42 (7.41, 45.84)   |       | -52% (-94, 266) | >0.80 |
| Esterified | Cell  | LA  | Epoxide  | 9(10)-EpOME   | 0  | 2.6 (1.26, 5.35)      | 2.4 (1.16, 4.94)      | 0.37  | -8% (-79, 311)  | >0.80 |
| Esterified | Cell  | LA  | Epoxide  | 9(10)-EpOME   | 15 | 2.79 (1.41, 5.53)     | 2.27 (1.14, 4.5)      |       | -19% (-78, 197) | >0.80 |
| Esterified | Cell  | LA  | Epoxide  | 9(10)-EpOME   | 30 | 3.1 (1.56, 6.15)      | 2.22 (1.12, 4.42)     |       | -28% (-79, 151) | >0.80 |
| Esterified | Cell  | LA  | Epoxide  | 9(10)-EpOME   | 60 | 4.23 (2, 8.94)        | 2.36 (1.12, 4.99)     |       | -44% (-89, 187) | >0.80 |
| NEOx       | Cell  | LA  | Epoxide  | 9(10)-EpOME   | 0  | 0.64 (0.19, 2.17)     | 0.55 (0.16, 1.85)     | 0.73  | -14% (-93, 891) | >0.80 |
| NEOx       | Cell  | LA  | Epoxide  | 9(10)-EpOME   | 15 | 0.58 (0.17, 1.96)     | 0.47 (0.14, 1.58)     |       | -20% (-91, 657) | >0.80 |
| NEOx       | Cell  | LA  | Epoxide  | 9(10)-EpOME   | 30 | 0.58 (0.17, 1.94)     | 0.44 (0.13, 1.47)     |       | -25% (-92, 581) | >0.80 |
| NEOx       | Cell  | LA  | Epoxide  | 9(10)-EpOME   | 60 | 0.75 (0.22, 2.6)      | 0.5 (0.15, 1.73)      |       | -33% (-95, 799) | >0.80 |
| Esterified | Media | LA  | Epoxide  | 9(10)-EpOME   | 0  | 0.75 (0.4, 1.42)      | 0.56 (0.3, 1.05)      | 0.42  | -26% (-80, 172) | >0.80 |
| Esterified | Media | LA  | Epoxide  | 9(10)-EpOME   | 15 | 0.71 (0.39, 1.31)     | 0.58 (0.32, 1.07)     |       | -18% (-74, 156) | >0.80 |
| Esterified | Media | LA  | Epoxide  | 9(10)-EpOME   | 30 | 0.71 (0.39, 1.31)     | 0.64 (0.35, 1.17)     |       | -10% (-70, 171) | >0.80 |
| Esterified | Media | LA  | Epoxide  | 9(10)-EpOME   | 60 | 0.84 (0.44, 1.6)      | 0.91 (0.47, 1.74)     |       | 8% (-74, 344)   | >0.80 |
| NEOx       | Media | LA  | Epoxide  | 9(10)-EpOME   | 0  | 0.51 (0.27, 0.97)     | 0.34 (0.18, 0.65)     | 0.24  | -33% (-82, 153) | >0.80 |
| NEOx       | Media | LA  | Epoxide  | 9(10)-EpOME   | 15 | 0.53 (0.32, 0.89)     | 0.43 (0.26, 0.72)     |       | -19% (-70, 123) | >0.80 |
| NEOx       | Media | LA  | Epoxide  | 9(10)-EpOME   | 30 | 0.52 (0.31, 0.89)     | 0.51 (0.3, 0.88)      |       | -2% (-61, 150)  | >0.80 |
| NEOx       | Media | LA  | Epoxide  | 9(10)-EpOME   | 60 | 0.44 (0.22, 0.87)     | 0.63 (0.32, 1.25)     |       | 44% (-69, 568)  | >0.80 |
| Esterified | Cell  | LA  | Epoxide  | 12(13)-EpOME  | 0  | 2.14 (1.1, 4.17)      | 2.71 (1.39, 5.29)     | 0.05  | 27% (-67, 386)  | >0.80 |
| Esterified | Cell  | LA  | Epoxide  | 12(13)-EpOME  | 15 | 2.34 (1.2, 4.54)      | 2.4 (1.24, 4.65)      |       | 3% (-70, 250)   | >0.80 |
| Esterified | Cell  | LA  | Epoxide  | 12(13)-EpOME  | 30 | 2.83 (1.46, 5.48)     | 2.35 (1.21, 4.54)     |       | -17% (-75, 176) | >0.80 |
| Esterified | Cell  | LA  | Epoxide  | 12(13)-EpOME  | 60 | 5.62 (2.85, 11.08)    | 3.05 (1.55, 6.02)     |       | -46% (-87, 127) | >0.80 |
| NEOx       | Cell  | LA  | Epoxide  | 12(13)-EpOME  | 0  | 0.94 (0.39, 2.29)     | 0.45 (0.19, 1.09)     | >0.80 | -52% (-93, 206) | >0.80 |
| NEOx       | Cell  | LA  | Epoxide  | 12(13)-EpOME  | 15 | 0.82 (0.39, 1.71)     | 0.4 (0.19, 0.85)      |       | -51% (-88, 110) | 0.69  |
| NEOx       | Cell  | LA  | Epoxide  | 12(13)-EpOME  | 30 | 0.77 (0.36, 1.66)     | 0.4 (0.18, 0.85)      |       | -49% (-87, 97)  | 0.67  |
| NEOx       | Cell  | LA  | Epoxide  | 12(13)-EpOME  | 60 | 0.91 (0.35, 2.37)     | 0.5 (0.19, 1.3)       |       | -45% (-93, 363) | >0.80 |
| Esterified | Media | LA  | Epoxide  | 12(13)-EpOME  | 0  | 0.4 (0.18, 0.87)      | 0.58 (0.27, 1.27)     | 0.04  | 45% (-74, 619)  | >0.80 |
| Esterified | Media | LA  | Epoxide  | 12(13)-EpOME  | 15 | 0.48 (0.23, 1.03)     | 0.52 (0.24, 1.1)      |       | 7% (-74, 340)   | >0.80 |
| Esterified | Media | LA  | Epoxide  | 12(13)-EpOME  | 30 | 0.65 (0.31, 1.39)     | 0.51 (0.24, 1.09)     |       | -22% (-80, 210) | >0.80 |
| Esterified | Media | LA  | Epoxide  | 12(13)-EpOME  | 60 | 1.65 (0.74, 3.66)     | 0.69 (0.31, 1.54)     |       | -58% (-93, 137) | 0.66  |
| NEOx       | Media | LA  | Epoxide  | 12(13)-EpOME  | 0  | 0.68 (0.23, 1.95)     | 0.4 (0.14, 1.16)      | 0.78  | -40% (-93, 410) | >0.80 |
| NEOx       | Media | LA  | Epoxide  | 12(13)-EpOME  | 15 | 0.52 (0.18, 1.46)     | 0.32 (0.11, 0.91)     |       | -38% (-91, 333) | >0.80 |
| NEOx       | Media | LA  | Epoxide  | 12(13)-EpOME  | 30 | 0.46 (0.16, 1.3)      | 0.3 (0.11, 0.85)      |       | -35% (-90, 334) | >0.80 |
| NEOx       | Media | LA  | Epoxide  | 12(13)-EpOME  | 60 | 0.58 (0.2, 1.71)      | 0.42 (0.14, 1.22)     |       | -28% (-93, 616) | >0.80 |
| Esterified | Cell  | AA  | Epoxide  | 14(15)-EpETrE | 0  | 0.28 (0.11, 0.72)     | 0.32 (0.13, 0.84)     | 0.29  | 17% (-84, 751)  | >0.80 |
| Esterified | Cell  | AA  | Epoxide  | 14(15)-EpETrE | 15 | 0.3 (0.14, 0.63)      | 0.27 (0.13, 0.57)     |       | -10% (-79, 292) | >0.80 |
| Esterified | Cell  | AA  | Epoxide  | 14(15)-EpETrE | 30 | 0.35 (0.16, 0.77)     | 0.24 (0.11, 0.54)     |       | -31% (-82, 166) | >0.80 |
| Esterified | Cell  | AA  | Epoxide  | 14(15)-EpETrE | 60 | 0.62 (0.22, 1.74)     | 0.25 (0.09, 0.71)     |       | -59% (-96, 315) | >0.80 |
| NEOx       | Cell  | AA  | Epoxide  | 14(15)-EpETrE | 0  | 0.15 (0.09, 0.23)     | 0.13 (0.08, 0.21)     | 0.72  | -9% (-65, 140)  | >0.80 |
| NEOx       | Cell  | AA  | Epoxide  | 14(15)-EpETrE | 15 | 0.18 (0.13, 0.25)     | 0.16 (0.11, 0.22)     |       | -13% (-56, 72)  | >0.80 |
| NEOx       | Cell  | AA  | Epoxide  | 14(15)-EpETrE | 30 | 0.19 (0.13, 0.28)     | 0.16 (0.11, 0.23)     |       | -17% (-55, 53)  | >0.80 |
| NEOx       | Cell  | AA  | Epoxide  | 14(15)-EpETrE | 60 | 0.15 (0.09, 0.26)     | 0.12 (0.07, 0.19)     |       | -24% (-76, 139) | >0.80 |
| Esterified | Media | AA  | Epoxide  | 14(15)-EpETrE | 0  | 0.12 (0.06, 0.22)     | 0.1 (0.05, 0.18)      | 0.15  | -19% (-78, 193) | >0.80 |
| Esterified | Media | AA  | Epoxide  | 14(15)-EpETrE | 15 | 0.18 (0.1, 0.32)      | 0.12 (0.07, 0.22)     |       | -31% (-78, 116) | >0.80 |
| Esterified | Media | AA  | Epoxide  | 14(15)-EpETrE | 30 | 0.22 (0.12, 0.41)     | 0.13 (0.07, 0.24)     |       | -41% (-81, 78)  | 0.7   |
| Esterified | Media | AA  | Epoxide  | 14(15)-EpETrE | 60 | 0.22 (0.12, 0.42)     | 0.09 (0.05, 0.18)     |       | -58% (-89, 70)  | 0.43  |
| NEOx       | Media | AA  | Epoxide  | 14(15)-EpETrE | 0  | 0.15 (0.09, 0.24)     | 0.12 (0.08, 0.2)      | 0.3   | -17% (-69, 123) | >0.80 |
| NEOx       | Media | AA  | Epoxide  | 14(15)-EpETrE | 15 | 0.13 (0.08, 0.21)     | 0.12 (0.07, 0.19)     |       | -9% (-62, 118)  | >0.80 |
| NEOx       | Media | AA  | Epoxide  | 14(15)-EpETrE | 30 | 0.12 (0.08, 0.19)     | 0.12 (0.08, 0.19)     |       | -1% (-58, 133)  | >0.80 |
| NEOx       | Media | AA  | Epoxide  | 14(15)-EpETrE | 60 | 0.12 (0.07, 0.2)      | 0.14 (0.09, 0.23)     |       | 19% (-59, 245)  | >0.80 |
| Esterified | Cell  | EPA | Epoxide  | 8(9)-EpETE    | 0  | 0.26 (0.11, 0.61)     | 0.3 (0.13, 0.7)       | 0.49  | 15% (-79, 519)  | >0.80 |
| Esterified | Cell  | EPA | Epoxide  | 8(9)-EpETE    | 15 | 0.3 (0.13, 0.71)      | 0.32 (0.13, 0.76)     |       | 7% (-78, 422)   | >0.80 |
| Esterified | Cell  | EPA | Epoxide  | 8(9)-EpETE    | 30 | 0.33 (0.14, 0.77)     | 0.33 (0.14, 0.77)     |       | 0% (-79, 376)   | >0.80 |
| Esterified | Cell  | EPA | Epoxide  | 8(9)-EpETE    | 60 | 0.33 (0.14, 0.78)     | 0.29 (0.12, 0.68)     |       | -14% (-85, 400) | >0.80 |
| NEOx       | Cell  | EPA | Epoxide  | 8(9)-EpETE    | 0  | 0.27 (0.14, 0.52)     | 0.29 (0.15, 0.55)     | 0.21  | 5% (-72, 297)   | >0.80 |
| NEOx       | Cell  | EPA | Epoxide  | 8(9)-EpETE    | 15 | 0.35 (0.19, 0.65)     | 0.32 (0.17, 0.59)     |       | -9% (-72, 192)  | >0.80 |
| NEOx       | Cell  | EPA | Epoxide  | 8(9)-EpETE    | 30 | 0.42 (0.23, 0.79)     | 0.33 (0.18, 0.62)     |       | -22% (-75, 144) | >0.80 |
| NEOx       | Cell  | EPA | Epoxide  | 8(9)-EpETE    | 60 | 0.52 (0.27, 1.02)     | 0.31 (0.16, 0.59)     |       | -42% (-86, 146) | >0.80 |
| Esterified | Media | EPA | Epoxide  | 8(9)-EpETE    | 0  | 0.37 (0.2, 0.68)      | 0.36 (0.19, 0.65)     | 0.07  | -4% (-72, 232)  | >0.80 |
| Esterified | Media | EPA | Epoxide  | 8(9)-EpETE    | 15 | 0.39 (0.22, 0.72)     | 0.31 (0.17, 0.57)     |       | -20% (-74, 142) | >0.80 |
| Esterified | Media | EPA | Epoxide  | 8(9)-EpETE    | 30 | 0.43 (0.24, 0.78)     | 0.28 (0.16, 0.51)     |       | -34% (-78, 94)  | >0.80 |
| Esterified | Media | EPA | Epoxide  | 8(9)-EpETE    | 60 | 0.55 (0.3, 1.02)      | 0.25 (0.13, 0.46)     |       | -55% (-88, 70)  | 0.45  |
| NEOx       | Media | EPA | Epoxide  | 8(9)-EpETE    | 0  | 0.23 (0.15, 0.36)     | 0.23 (0.15, 0.36)     | >0.80 | 0% (-59, 145)   | >0.80 |

|            |       |     |         |              |    |                    |                    |                  |       |
|------------|-------|-----|---------|--------------|----|--------------------|--------------------|------------------|-------|
| NEOx       | Media | EPA | Epoxide | 8(9)-EpETE   | 15 | 0.3 (0.21, 0.43)   | 0.31 (0.22, 0.44)  | 2% (-49, 102)    | >0.80 |
| NEOx       | Media | EPA | Epoxide | 8(9)-EpETE   | 30 | 0.35 (0.24, 0.5)   | 0.36 (0.25, 0.52)  | 3% (-46, 95)     | >0.80 |
| NEOx       | Media | EPA | Epoxide | 8(9)-EpETE   | 60 | 0.32 (0.2, 0.53)   | 0.33 (0.21, 0.53)  | 5% (-62, 195)    | >0.80 |
| Esterified | Cell  | EPA | Epoxide | 14(15)-EpETE | 0  | 2.14 (1.4, 3.3)    | 2.16 (1.41, 3.33)  | 1% (-58, 141)    | >0.80 |
| Esterified | Cell  | EPA | Epoxide | 14(15)-EpETE | 15 | 2.18 (1.68, 2.82)  | 2 (1.54, 2.59)     | -8% (-45, 54)    | >0.80 |
| Esterified | Cell  | EPA | Epoxide | 14(15)-EpETE | 30 | 2.22 (1.63, 3.02)  | 1.85 (1.36, 2.51)  | -17% (-45, 26)   | 0.78  |
| Esterified | Cell  | EPA | Epoxide | 14(15)-EpETE | 60 | 2.31 (1.42, 3.73)  | 1.59 (0.98, 2.57)  | -31% (-76, 101)  | >0.80 |
| NEOx       | Cell  | EPA | Epoxide | 14(15)-EpETE | 0  | 0.98 (0.39, 2.49)  | 1.13 (0.45, 2.85)  | 15% (-84, 701)   | >0.80 |
| NEOx       | Cell  | EPA | Epoxide | 14(15)-EpETE | 15 | 1.54 (0.73, 3.27)  | 1.41 (0.67, 3)     | -8% (-79, 302)   | >0.80 |
| NEOx       | Cell  | EPA | Epoxide | 14(15)-EpETE | 30 | 1.85 (0.84, 4.06)  | 1.36 (0.62, 2.98)  | -27% (-81, 187)  | >0.80 |
| NEOx       | Cell  | EPA | Epoxide | 14(15)-EpETE | 60 | 1.2 (0.44, 3.25)   | 0.56 (0.21, 1.52)  | -53% (-95, 343)  | >0.80 |
| Esterified | Media | EPA | Epoxide | 14(15)-EpETE | 0  | 0.99 (0.35, 2.8)   | 2.4 (0.85, 6.76)   | 142% (-70, 1865) | >0.80 |
| Esterified | Media | EPA | Epoxide | 14(15)-EpETE | 15 | 1.18 (0.64, 2.19)  | 1.94 (1.05, 3.61)  | 65% (-52, 466)   | >0.80 |
| Esterified | Media | EPA | Epoxide | 14(15)-EpETE | 30 | 1.46 (0.7, 3.05)   | 1.63 (0.78, 3.42)  | 12% (-58, 197)   | >0.80 |
| Esterified | Media | EPA | Epoxide | 14(15)-EpETE | 60 | 2.46 (0.77, 7.87)  | 1.28 (0.4, 4.09)   | -48% (-96, 589)  | >0.80 |
| NEOx       | Media | EPA | Epoxide | 14(15)-EpETE | 0  | 1.48 (0.66, 3.32)  | 0.95 (0.43, 2.14)  | -36% (-88, 245)  | >0.80 |
| NEOx       | Media | EPA | Epoxide | 14(15)-EpETE | 15 | 1.68 (0.91, 3.11)  | 1.23 (0.67, 2.28)  | -27% (-78, 149)  | >0.80 |
| NEOx       | Media | EPA | Epoxide | 14(15)-EpETE | 30 | 1.73 (0.89, 3.34)  | 1.44 (0.75, 2.79)  | -16% (-72, 154)  | >0.80 |
| NEOx       | Media | EPA | Epoxide | 14(15)-EpETE | 60 | 1.37 (0.57, 3.29)  | 1.49 (0.62, 3.57)  | 9% (-85, 680)    | >0.80 |
| Esterified | Cell  | EPA | Epoxide | 17(18)-EpETE | 0  | 3.45 (1.25, 9.55)  | 1.33 (0.48, 3.67)  | -62% (-95, 202)  | 0.73  |
| Esterified | Cell  | EPA | Epoxide | 17(18)-EpETE | 15 | 4.32 (2.31, 8.08)  | 1.82 (0.98, 3.41)  | -58% (-88, 48)   | 0.31  |
| Esterified | Cell  | EPA | Epoxide | 17(18)-EpETE | 30 | 4.49 (2.15, 9.37)  | 2.08 (1, 4.34)     | -54% (-83, 28)   | 0.22  |
| Esterified | Cell  | EPA | Epoxide | 17(18)-EpETE | 60 | 2.77 (0.89, 8.63)  | 1.55 (0.5, 4.83)   | -44% (-96, 603)  | >0.80 |
| NEOx       | Cell  | EPA | Epoxide | 17(18)-EpETE | 0  | 5.04 (1.29, 19.76) | 2.95 (0.75, 11.57) | -41% (-96, 868)  | >0.80 |
| NEOx       | Cell  | EPA | Epoxide | 17(18)-EpETE | 15 | 2.9 (0.78, 10.82)  | 1.49 (0.4, 5.56)   | -49% (-96, 510)  | >0.80 |
| NEOx       | Cell  | EPA | Epoxide | 17(18)-EpETE | 30 | 2.43 (0.65, 9.07)  | 1.1 (0.29, 4.09)   | -55% (-96, 399)  | >0.80 |
| NEOx       | Cell  | EPA | Epoxide | 17(18)-EpETE | 60 | 5.32 (1.31, 21.69) | 1.85 (0.45, 7.53)  | -65% (-98, 629)  | >0.80 |
| Esterified | Media | EPA | Epoxide | 17(18)-EpETE | 0  | 3.08 (1.29, 7.36)  | 1.75 (0.73, 4.18)  | -43% (-90, 228)  | >0.80 |
| Esterified | Media | EPA | Epoxide | 17(18)-EpETE | 15 | 3.02 (1.81, 5.05)  | 2.08 (1.25, 3.48)  | -31% (-75, 92)   | >0.80 |
| Esterified | Media | EPA | Epoxide | 17(18)-EpETE | 30 | 3.4 (1.83, 6.3)    | 2.84 (1.53, 5.26)  | -16% (-63, 86)   | >0.80 |
| Esterified | Media | EPA | Epoxide | 17(18)-EpETE | 60 | 6.44 (2.43, 17.1)  | 7.92 (2.98, 21.03) | 23% (-86, 973)   | >0.80 |
| NEOx       | Media | EPA | Epoxide | 17(18)-EpETE | 0  | 3.06 (1.37, 6.85)  | 3.48 (1.55, 7.78)  | 14% (-79, 511)   | >0.80 |
| NEOx       | Media | EPA | Epoxide | 17(18)-EpETE | 15 | 2.35 (1.14, 4.88)  | 2.83 (1.36, 5.87)  | 20% (-70, 387)   | >0.80 |
| NEOx       | Media | EPA | Epoxide | 17(18)-EpETE | 30 | 2.17 (1.04, 4.55)  | 2.76 (1.32, 5.78)  | 27% (-67, 383)   | >0.80 |
| NEOx       | Media | EPA | Epoxide | 17(18)-EpETE | 60 | 3.2 (1.37, 7.47)   | 4.55 (1.95, 10.6)  | 42% (-78, 829)   | >0.80 |
| Esterified | Cell  | DHA | Epoxide | 10(11)-EpDPE | 0  | 1.09 (0.49, 2.4)   | 1.57 (0.71, 3.45)  | 44% (-72, 647)   | >0.80 |
| Esterified | Cell  | DHA | Epoxide | 10(11)-EpDPE | 15 | 2.35 (1.29, 4.27)  | 2.75 (1.51, 4.99)  | 17% (-64, 284)   | >0.80 |
| Esterified | Cell  | DHA | Epoxide | 10(11)-EpDPE | 30 | 3.93 (2.07, 7.46)  | 3.72 (1.96, 7.06)  | -5% (-68, 177)   | >0.80 |
| Esterified | Cell  | DHA | Epoxide | 10(11)-EpDPE | 60 | 5.1 (2.16, 12.06)  | 3.17 (1.34, 7.5)   | -38% (-91, 331)  | >0.80 |
| NEOx       | Cell  | DHA | Epoxide | 10(11)-EpDPE | 0  | 0.5 (0.23, 1.11)   | 0.7 (0.32, 1.55)   | 40% (-74, 642)   | >0.80 |
| NEOx       | Cell  | DHA | Epoxide | 10(11)-EpDPE | 15 | 0.99 (0.49, 2)     | 0.95 (0.47, 1.91)  | -4% (-75, 272)   | >0.80 |
| NEOx       | Cell  | DHA | Epoxide | 10(11)-EpDPE | 30 | 1.6 (0.78, 3.27)   | 1.04 (0.51, 2.14)  | -35% (-82, 137)  | >0.80 |
| NEOx       | Cell  | DHA | Epoxide | 10(11)-EpDPE | 60 | 2.25 (0.97, 5.22)  | 0.69 (0.3, 1.6)    | -69% (-95, 101)  | 0.40  |
| Esterified | Media | DHA | Epoxide | 10(11)-EpDPE | 0  | 1.72 (0.64, 4.67)  | 0.62 (0.23, 1.69)  | -64% (-96, 193)  | 0.69  |
| Esterified | Media | DHA | Epoxide | 10(11)-EpDPE | 15 | 1.42 (0.59, 3.45)  | 0.61 (0.25, 1.48)  | -57% (-92, 137)  | 0.67  |
| Esterified | Media | DHA | Epoxide | 10(11)-EpDPE | 30 | 1.26 (0.51, 3.1)   | 0.64 (0.26, 1.58)  | -49% (-90, 157)  | >0.80 |
| Esterified | Media | DHA | Epoxide | 10(11)-EpDPE | 60 | 1.22 (0.42, 3.5)   | 0.87 (0.3, 2.51)   | -28% (-93, 652)  | >0.80 |
| NEOx       | Media | DHA | Epoxide | 10(11)-EpDPE | 0  | 1.63 (0.54, 4.97)  | 0.61 (0.2, 1.85)   | -63% (-96, 256)  | 0.78  |
| NEOx       | Media | DHA | Epoxide | 10(11)-EpDPE | 15 | 1.18 (0.39, 3.52)  | 0.59 (0.2, 1.77)   | -50% (-93, 286)  | >0.80 |
| NEOx       | Media | DHA | Epoxide | 10(11)-EpDPE | 30 | 0.96 (0.32, 2.84)  | 0.65 (0.22, 1.93)  | -32% (-91, 398)  | >0.80 |
| NEOx       | Media | DHA | Epoxide | 10(11)-EpDPE | 60 | 0.89 (0.29, 2.77)  | 1.11 (0.36, 3.45)  | 24% (-89, 1301)  | >0.80 |
| Esterified | Cell  | DHA | Epoxide | 13(14)-EpDPE | 0  | 0.76 (0.2, 2.89)   | 0.82 (0.22, 3.12)  | 8% (-92, 1414)   | >0.80 |
| Esterified | Cell  | DHA | Epoxide | 13(14)-EpDPE | 15 | 0.83 (0.22, 3.16)  | 0.86 (0.23, 3.29)  | 4% (-91, 1114)   | >0.80 |
| Esterified | Cell  | DHA | Epoxide | 13(14)-EpDPE | 30 | 0.97 (0.26, 3.67)  | 0.97 (0.26, 3.67)  | 0% (-91, 1025)   | >0.80 |
| Esterified | Cell  | DHA | Epoxide | 13(14)-EpDPE | 60 | 1.65 (0.43, 6.33)  | 1.53 (0.4, 5.88)   | -7% (-94, 1395)  | >0.80 |
| NEOx       | Cell  | DHA | Epoxide | 13(14)-EpDPE | 0  | 0.26 (0.15, 0.44)  | 0.28 (0.16, 0.49)  | 11% (-64, 245)   | >0.80 |
| NEOx       | Cell  | DHA | Epoxide | 13(14)-EpDPE | 15 | 0.22 (0.13, 0.38)  | 0.2 (0.12, 0.35)   | -8% (-66, 150)   | >0.80 |
| NEOx       | Cell  | DHA | Epoxide | 13(14)-EpDPE | 30 | 0.22 (0.13, 0.37)  | 0.17 (0.1, 0.28)   | -24% (-72, 101)  | >0.80 |
| NEOx       | Cell  | DHA | Epoxide | 13(14)-EpDPE | 60 | 0.3 (0.17, 0.52)   | 0.15 (0.09, 0.27)  | -49% (-85, 75)   | 0.57  |
| Esterified | Media | DHA | Epoxide | 13(14)-EpDPE | 0  | 0.3 (0.18, 0.5)    | 0.3 (0.18, 0.5)    | 0% (-65, 185)    | >0.80 |
| Esterified | Media | DHA | Epoxide | 13(14)-EpDPE | 15 | 0.28 (0.2, 0.4)    | 0.28 (0.2, 0.39)   | -3% (-52, 95)    | >0.80 |
| Esterified | Media | DHA | Epoxide | 13(14)-EpDPE | 30 | 0.28 (0.19, 0.42)  | 0.27 (0.18, 0.39)  | -5% (-48, 73)    | >0.80 |
| Esterified | Media | DHA | Epoxide | 13(14)-EpDPE | 60 | 0.34 (0.19, 0.6)   | 0.3 (0.17, 0.53)   | -11% (-75, 215)  | >0.80 |
| NEOx       | Media | DHA | Epoxide | 13(14)-EpDPE | 0  | 0.28 (0.16, 0.48)  | 0.21 (0.12, 0.36)  | -25% (-75, 129)  | >0.80 |
| NEOx       | Media | DHA | Epoxide | 13(14)-EpDPE | 15 | 0.26 (0.16, 0.43)  | 0.2 (0.12, 0.33)   | -24% (-71, 100)  | >0.80 |
| NEOx       | Media | DHA | Epoxide | 13(14)-EpDPE | 30 | 0.25 (0.15, 0.42)  | 0.19 (0.12, 0.32)  | -23% (-70, 96)   | >0.80 |
| NEOx       | Media | DHA | Epoxide | 13(14)-EpDPE | 60 | 0.26 (0.15, 0.46)  | 0.21 (0.12, 0.36)  | -21% (-77, 167)  | >0.80 |
| Esterified | Cell  | DHA | Epoxide | 16(17)-EpDPE | 0  | 0.7 (0.36, 1.37)   | 0.95 (0.49, 1.85)  | 35% (-67, 446)   | >0.80 |
| Esterified | Cell  | DHA | Epoxide | 16(17)-EpDPE | 15 | 0.88 (0.52, 1.5)   | 1.12 (0.66, 1.9)   | 27% (-56, 263)   | >0.80 |
| Esterified | Cell  | DHA | Epoxide | 16(17)-EpDPE | 30 | 1.07 (0.61, 1.87)  | 1.27 (0.73, 2.23)  | 19% (-55, 214)   | >0.80 |
| Esterified | Cell  | DHA | Epoxide | 16(17)-EpDPE | 60 | 1.42 (0.69, 2.92)  | 1.5 (0.73, 3.09)   | 6% (-79, 437)    | >0.80 |
| NEOx       | Cell  | DHA | Epoxide | 16(17)-EpDPE | 0  | 0.5 (0.34, 0.76)   | 0.38 (0.25, 0.56)  | -26% (-67, 69)   | >0.80 |
| NEOx       | Cell  | DHA | Epoxide | 16(17)-EpDPE | 15 | 0.47 (0.32, 0.71)  | 0.35 (0.23, 0.52)  | -26% (-65, 56)   | >0.80 |
| NEOx       | Cell  | DHA | Epoxide | 16(17)-EpDPE | 30 | 0.46 (0.31, 0.68)  | 0.34 (0.23, 0.5)   | -26% (-64, 53)   | >0.80 |
| NEOx       | Cell  | DHA | Epoxide | 16(17)-EpDPE | 60 | 0.47 (0.31, 0.71)  | 0.34 (0.23, 0.52)  | -27% (-70, 76)   | >0.80 |
| Esterified | Media | DHA | Epoxide | 16(17)-EpDPE | 0  | 0.46 (0.25, 0.88)  | 0.44 (0.23, 0.82)  | -6% (-74, 240)   | >0.80 |
| Esterified | Media | DHA | Epoxide | 16(17)-EpDPE | 15 | 0.46 (0.25, 0.87)  | 0.47 (0.25, 0.89)  | 3% (-68, 231)    | >0.80 |
| Esterified | Media | DHA | Epoxide | 16(17)-EpDPE | 30 | 0.46 (0.25, 0.86)  | 0.52 (0.28, 0.97)  | 13% (-64, 255)   | >0.80 |
| Esterified | Media | DHA | Epoxide | 16(17)-EpDPE | 60 | 0.47 (0.24, 0.89)  | 0.64 (0.33, 1.21)  | 36% (-66, 439)   | >0.80 |
| NEOx       | Media | DHA | Epoxide | 16(17)-EpDPE | 0  | 0.44 (0.28, 0.71)  | 0.37 (0.23, 0.58)  | -18% (-67, 105)  | >0.80 |
| NEOx       | Media | DHA | Epoxide | 16(17)-EpDPE | 15 | 0.38 (0.24, 0.61)  | 0.35 (0.22, 0.56)  | -8% (-61, 118)   | >0.80 |
| NEOx       | Media | DHA | Epoxide | 16(17)-EpDPE | 30 | 0.35 (0.22, 0.56)  | 0.36 (0.22, 0.57)  | 3% (-56, 141)    | >0.80 |
| NEOx       | Media | DHA | Epoxide | 16(17)-EpDPE | 60 | 0.37 (0.23, 0.59)  | 0.48 (0.3, 0.76)   | 28% (-50, 231)   | >0.80 |
| Esterified | Cell  | DHA | Epoxide | 19(20)-EpDPE | 0  | 12.1 (5.6, 26.3)   | 13.2 (6.1, 28.7)   | 9% (-78, 431)    | >0.80 |
| Esterified | Cell  | DHA | Epoxide | 19(20)-EpDPE | 15 | 14.8 (7, 31.4)     | 14.4 (6.8, 30.4)   | -3% (-76, 295)   | >0.80 |

|            |       |     |         |                |    |                       |                       |                  |       |
|------------|-------|-----|---------|----------------|----|-----------------------|-----------------------|------------------|-------|
| Esterified | Cell  | DHA | Epoxide | 19(20)-EpDPE   | 30 | 17.6 (8.3, 37.3)      | 15.2 (7.2, 32.1)      | -14% (-78, 237)  | >0.80 |
| Esterified | Cell  | DHA | Epoxide | 19(20)-EpDPE   | 60 | 23.1 (10.4, 51)       | 15.6 (7.1, 34.5)      | -32% (-88, 274)  | >0.80 |
| NEOx       | Cell  | DHA | Epoxide | 19(20)-EpDPE   | 0  | 0.09 (0.05, 0.16)     | 0.07 (0.04, 0.12)     | -27% (-76, 122)  | >0.80 |
| NEOx       | Cell  | DHA | Epoxide | 19(20)-EpDPE   | 15 | 0.12 (0.08, 0.19)     | 0.09 (0.06, 0.14)     | -27% (-69, 72)   | >0.80 |
| NEOx       | Cell  | DHA | Epoxide | 19(20)-EpDPE   | 30 | 0.14 (0.09, 0.22)     | 0.11 (0.07, 0.17)     | -26% (-66, 63)   | >0.80 |
| NEOx       | Cell  | DHA | Epoxide | 19(20)-EpDPE   | 60 | 0.13 (0.07, 0.23)     | 0.1 (0.06, 0.17)      | -25% (-79, 172)  | >0.80 |
| Esterified | Media | DHA | Epoxide | 19(20)-EpDPE   | 0  | 0.36 (0.19, 0.68)     | 0.38 (0.2, 0.71)      | 4% (-72, 283)    | >0.80 |
| Esterified | Media | DHA | Epoxide | 19(20)-EpDPE   | 15 | 0.36 (0.23, 0.55)     | 0.35 (0.23, 0.53)     | -3% (-59, 127)   | >0.80 |
| Esterified | Media | DHA | Epoxide | 19(20)-EpDPE   | 30 | 0.38 (0.23, 0.61)     | 0.34 (0.21, 0.54)     | -11% (-57, 87)   | >0.80 |
| Esterified | Media | DHA | Epoxide | 19(20)-EpDPE   | 60 | 0.51 (0.25, 1.02)     | 0.39 (0.19, 0.78)     | -23% (-84, 267)  | >0.80 |
| NEOx       | Media | DHA | Epoxide | 19(20)-EpDPE   | 0  | 0.12 (0.06, 0.24)     | 0.08 (0.04, 0.15)     | -38% (-85, 148)  | >0.80 |
| NEOx       | Media | DHA | Epoxide | 19(20)-EpDPE   | 15 | 0.14 (0.07, 0.27)     | 0.09 (0.04, 0.17)     | -36% (-82, 127)  | >0.80 |
| NEOx       | Media | DHA | Epoxide | 19(20)-EpDPE   | 30 | 0.14 (0.07, 0.27)     | 0.09 (0.05, 0.18)     | -33% (-80, 130)  | >0.80 |
| NEOx       | Media | DHA | Epoxide | 19(20)-EpDPE   | 60 | 0.1 (0.05, 0.2)       | 0.07 (0.04, 0.15)     | -27% (-83, 224)  | >0.80 |
| Esterified | Cell  | LA  | Diol    | 9(10)-DiHOME   | 0  | 45 (14.3, 141.2)      | 46.2 (14.7, 145.1)    | 3% (-91, 1021)   | >0.80 |
| Esterified | Cell  | LA  | Diol    | 9(10)-DiHOME   | 15 | 24.7 (8.7, 70.2)      | 29.8 (10.5, 84.5)     | 20% (-84, 787)   | >0.80 |
| Esterified | Cell  | LA  | Diol    | 9(10)-DiHOME   | 30 | 18.9 (6.6, 54.2)      | 26.6 (9.3, 76.4)      | 41% (-79, 851)   | >0.80 |
| Esterified | Cell  | LA  | Diol    | 9(10)-DiHOME   | 60 | 29.3 (8.8, 97.4)      | 56.6 (17.1, 188.1)    | 93% (-87, 2666)  | >0.80 |
| NEOx       | Cell  | LA  | Diol    | 9(10)-DiHOME   | 0  | 48.26 (20.95, 111.15) | 18.98 (8.24, 43.71)   | -61% (-93, 124)  | 0.58  |
| NEOx       | Cell  | LA  | Diol    | 9(10)-DiHOME   | 15 | 37.62 (20.17, 70.19)  | 16.03 (8.59, 29.91)   | -57% (-88, 48)   | 0.31  |
| NEOx       | Cell  | LA  | Diol    | 9(10)-DiHOME   | 30 | 35.49 (18.12, 69.52)  | 16.39 (8.37, 32.1)    | -54% (-85, 41)   | 0.30  |
| NEOx       | Cell  | LA  | Diol    | 9(10)-DiHOME   | 60 | 55.91 (22.46, 139.17) | 30.32 (12.18, 75.46)  | -46% (-93, 321)  | >0.80 |
| Esterified | Media | LA  | Diol    | 9(10)-DiHOME   | 0  | 25.2 (8.87, 71.64)    | 15.51 (5.46, 44.1)    | -38% (-94, 416)  | >0.80 |
| Esterified | Media | LA  | Diol    | 9(10)-DiHOME   | 15 | 20.46 (7.34, 56.99)   | 12.63 (4.53, 35.18)   | -38% (-91, 317)  | >0.80 |
| Esterified | Media | LA  | Diol    | 9(10)-DiHOME   | 30 | 19.9 (7.17, 55.23)    | 12.32 (4.44, 34.19)   | -38% (-90, 299)  | >0.80 |
| Esterified | Media | LA  | Diol    | 9(10)-DiHOME   | 60 | 32.37 (11.14, 94.1)   | 20.15 (6.93, 58.59)   | -38% (-94, 511)  | >0.80 |
| NEOx       | Media | LA  | Diol    | 9(10)-DiHOME   | 0  | 28.75 (8.64, 95.69)   | 27.23 (8.18, 90.66)   | -5% (-92, 997)   | >0.80 |
| NEOx       | Media | LA  | Diol    | 9(10)-DiHOME   | 15 | 18.5 (5.7, 60.08)     | 18.59 (5.72, 60.36)   | 0% (-89, 804)    | >0.80 |
| NEOx       | Media | LA  | Diol    | 9(10)-DiHOME   | 30 | 13.94 (4.31, 45.1)    | 14.86 (4.59, 48.05)   | 7% (-87, 808)    | >0.80 |
| NEOx       | Media | LA  | Diol    | 9(10)-DiHOME   | 60 | 12.72 (3.72, 43.48)   | 15.24 (4.46, 52.09)   | 20% (-91, 1569)  | >0.80 |
| Esterified | Cell  | LA  | Diol    | 12(13)-DiHOME  | 0  | 75 (27.7, 203.1)      | 61.5 (22.7, 166.5)    | -18% (-90, 561)  | >0.80 |
| Esterified | Cell  | LA  | Diol    | 12(13)-DiHOME  | 15 | 74.5 (33.3, 166.5)    | 69.8 (31.2, 156.1)    | -6% (-81, 357)   | >0.80 |
| Esterified | Cell  | LA  | Diol    | 12(13)-DiHOME  | 30 | 68.9 (29.6, 160)      | 73.9 (31.8, 171.7)    | 7% (-75, 364)    | >0.80 |
| Esterified | Cell  | LA  | Diol    | 12(13)-DiHOME  | 60 | 47.6 (16.2, 139.3)    | 66.8 (22.8, 195.6)    | 40% (-87, 1471)  | >0.80 |
| NEOx       | Cell  | LA  | Diol    | 12(13)-DiHOME  | 0  | 42.94 (16.1, 114.48)  | 30.73 (11.53, 81.94)  | -28% (-90, 437)  | >0.80 |
| NEOx       | Cell  | LA  | Diol    | 12(13)-DiHOME  | 15 | 39.63 (15.4, 101.98)  | 35.49 (13.79, 91.34)  | -10% (-85, 429)  | >0.80 |
| NEOx       | Cell  | LA  | Diol    | 12(13)-DiHOME  | 30 | 38.71 (15.05, 99.54)  | 43.38 (16.87, 111.56) | 12% (-80, 528)   | >0.80 |
| NEOx       | Cell  | LA  | Diol    | 12(13)-DiHOME  | 60 | 43.77 (15.96, 120.08) | 76.81 (28, 210.71)    | 75% (-80, 1466)  | >0.80 |
| Esterified | Media | LA  | Diol    | 12(13)-DiHOME  | 0  | 20.88 (6.99, 62.35)   | 23.62 (7.91, 70.55)   | 13% (-89, 1014)  | >0.80 |
| Esterified | Media | LA  | Diol    | 12(13)-DiHOME  | 15 | 29.55 (10.99, 79.48)  | 26.19 (9.74, 70.43)   | -11% (-87, 492)  | >0.80 |
| Esterified | Media | LA  | Diol    | 12(13)-DiHOME  | 30 | 35.85 (13.15, 97.69)  | 24.88 (9.13, 67.81)   | -31% (-89, 325)  | >0.80 |
| Esterified | Media | LA  | Diol    | 12(13)-DiHOME  | 60 | 33.22 (10.52, 104.91) | 14.14 (4.48, 44.67)   | -57% (-97, 448)  | >0.80 |
| NEOx       | Media | LA  | Diol    | 12(13)-DiHOME  | 0  | 12.79 (2.84, 57.69)   | 34.52 (7.65, 155.63)  | 170% (-88, 5840) | >0.80 |
| NEOx       | Media | LA  | Diol    | 12(13)-DiHOME  | 15 | 15.27 (3.56, 65.44)   | 30.12 (7.03, 129.03)  | 97% (-87, 2925)  | >0.80 |
| NEOx       | Media | LA  | Diol    | 12(13)-DiHOME  | 30 | 17.17 (4.01, 73.42)   | 24.74 (5.78, 105.82)  | 44% (-90, 1944)  | >0.80 |
| NEOx       | Media | LA  | Diol    | 12(13)-DiHOME  | 60 | 18.09 (3.85, 85.1)    | 13.93 (2.96, 65.52)   | -23% (-97, 2101) | >0.80 |
| Esterified | Cell  | AA  | Diol    | 14(15)-DiHETrE | 0  | 4.7 (2.5, 8.7)        | 6.8 (3.7, 12.7)       | 46% (-56, 385)   | >0.80 |
| Esterified | Cell  | AA  | Diol    | 14(15)-DiHETrE | 15 | 4.8 (3.5, 6.5)        | 6.8 (5, 9.2)          | 41% (-20, 148)   | 0.46  |
| Esterified | Cell  | AA  | Diol    | 14(15)-DiHETrE | 30 | 5.1 (3.4, 7.7)        | 6.9 (4.6, 10.4)       | 36% (-1, 85)     | 0.06  |
| Esterified | Cell  | AA  | Diol    | 14(15)-DiHETrE | 60 | 6.4 (3.2, 12.9)       | 8.1 (4, 16.3)         | 27% (-73, 486)   | >0.80 |
| NEOx       | Cell  | AA  | Diol    | 14(15)-DiHETrE | 0  | 3.6 (1.33, 9.71)      | 3.61 (1.34, 9.73)     | 0% (-87, 701)    | >0.80 |
| NEOx       | Cell  | AA  | Diol    | 14(15)-DiHETrE | 15 | 3.97 (1.64, 9.61)     | 4.14 (1.71, 10.03)    | 4% (-81, 474)    | >0.80 |
| NEOx       | Cell  | AA  | Diol    | 14(15)-DiHETrE | 30 | 4.5 (1.83, 11.08)     | 4.9 (1.99, 12.06)     | 9% (-78, 450)    | >0.80 |
| NEOx       | Cell  | AA  | Diol    | 14(15)-DiHETrE | 60 | 6.35 (2.23, 18.11)    | 7.5 (2.63, 21.4)      | 18% (-89, 1121)  | >0.80 |
| Esterified | Media | AA  | Diol    | 14(15)-DiHETrE | 0  | 1.63 (0.61, 4.37)     | 2.18 (0.81, 5.87)     | 34% (-82, 886)   | >0.80 |
| Esterified | Media | AA  | Diol    | 14(15)-DiHETrE | 15 | 1.75 (0.66, 4.66)     | 2.34 (0.88, 6.24)     | 34% (-78, 725)   | >0.80 |
| Esterified | Media | AA  | Diol    | 14(15)-DiHETrE | 30 | 1.97 (0.74, 5.24)     | 2.64 (1, 7.01)        | 34% (-77, 694)   | >0.80 |
| Esterified | Media | AA  | Diol    | 14(15)-DiHETrE | 60 | 2.94 (1.08, 8.04)     | 3.93 (1.44, 10.74)    | 34% (-84, 1018)  | >0.80 |
| NEOx       | Media | AA  | Diol    | 14(15)-DiHETrE | 0  | 2.85 (1.51, 5.38)     | 1.86 (0.98, 3.51)     | -35% (-82, 143)  | >0.80 |
| NEOx       | Media | AA  | Diol    | 14(15)-DiHETrE | 15 | 1.87 (1.2, 2.91)      | 1.65 (1.06, 2.57)     | -12% (-64, 114)  | >0.80 |
| NEOx       | Media | AA  | Diol    | 14(15)-DiHETrE | 30 | 1.51 (0.92, 2.47)     | 1.8 (1.1, 2.94)       | 19% (-45, 158)   | >0.80 |
| NEOx       | Media | AA  | Diol    | 14(15)-DiHETrE | 60 | 1.82 (0.9, 3.68)      | 3.98 (1.97, 8.03)     | 118% (-55, 955)  | 0.67  |
| Esterified | Cell  | EPA | Diol    | 8(9)-DiHETE    | 0  | 44.5 (12.9, 153.3)    | 54.8 (15.9, 188.8)    | 23% (-91, 1549)  | >0.80 |
| Esterified | Cell  | EPA | Diol    | 8(9)-DiHETE    | 15 | 45.8 (16, 131.2)      | 50.2 (17.6, 143.7)    | 10% (-86, 751)   | >0.80 |
| Esterified | Cell  | EPA | Diol    | 8(9)-DiHETE    | 30 | 50.8 (17.2, 150.2)    | 49.5 (16.8, 146.5)    | -3% (-86, 566)   | >0.80 |
| Esterified | Cell  | EPA | Diol    | 8(9)-DiHETE    | 60 | 77.8 (20.8, 291.3)    | 60 (16, 224.8)        | -23% (-96, 1388) | >0.80 |
| NEOx       | Cell  | EPA | Diol    | 8(9)-DiHETE    | 0  | 31.18 (7.38, 131.72)  | 24.01 (5.68, 101.46)  | -23% (-96, 1472) | >0.80 |
| NEOx       | Cell  | EPA | Diol    | 8(9)-DiHETE    | 15 | 29.39 (9.39, 91.95)   | 18.84 (6.02, 58.96)   | -36% (-93, 511)  | >0.80 |
| NEOx       | Cell  | EPA | Diol    | 8(9)-DiHETE    | 30 | 33.56 (10.07, 111.86) | 17.92 (5.38, 59.72)   | -47% (-93, 323)  | >0.80 |
| NEOx       | Cell  | EPA | Diol    | 8(9)-DiHETE    | 60 | 77.93 (16.37, 370.9)  | 28.83 (6.06, 137.22)  | -63% (-99, 1135) | >0.80 |
| Esterified | Media | EPA | Diol    | 8(9)-DiHETE    | 0  | 25.45 (6.05, 107.02)  | 10.96 (2.61, 46.1)    | -57% (-98, 657)  | >0.80 |
| Esterified | Media | EPA | Diol    | 8(9)-DiHETE    | 15 | 19.52 (4.64, 82.05)   | 15.17 (3.61, 63.79)   | -22% (-94, 997)  | >0.80 |
| Esterified | Media | EPA | Diol    | 8(9)-DiHETE    | 30 | 15.1 (3.62, 62.96)    | 21.19 (5.08, 88.35)   | 40% (-90, 1790)  | >0.80 |
| Esterified | Media | EPA | Diol    | 8(9)-DiHETE    | 60 | 9.29 (2.17, 39.71)    | 42.47 (9.94, 181.5)   | 357% (-78, 9377) | 0.66  |
| NEOx       | Media | EPA | Diol    | 8(9)-DiHETE    | 0  | 12.82 (2.85, 57.75)   | 13.06 (2.9, 58.81)    | 2% (-95, 1968)   | >0.80 |
| NEOx       | Media | EPA | Diol    | 8(9)-DiHETE    | 15 | 15.6 (3.48, 70.05)    | 14.03 (3.13, 63.01)   | -10% (-94, 1337) | >0.80 |
| NEOx       | Media | EPA | Diol    | 8(9)-DiHETE    | 30 | 18.81 (4.23, 83.71)   | 14.94 (3.36, 66.51)   | -21% (-95, 1107) | >0.80 |
| NEOx       | Media | EPA | Diol    | 8(9)-DiHETE    | 60 | 26.56 (5.79, 121.83)  | 16.46 (3.59, 75.52)   | -38% (-97, 1406) | >0.80 |
| Esterified | Cell  | EPA | Diol    | 11(12)-DiHETE  | 0  | 15.8 (6.6, 38.1)      | 6.1 (2.5, 14.7)       | -62% (-94, 143)  | 0.62  |
| Esterified | Cell  | EPA | Diol    | 11(12)-DiHETE  | 15 | 9.3 (4.3, 20.1)       | 4.2 (1.9, 9.1)        | -55% (-90, 102)  | 0.60  |
| Esterified | Cell  | EPA | Diol    | 11(12)-DiHETE  | 30 | 7.4 (3.3, 16.3)       | 3.9 (1.8, 8.7)        | -47% (-87, 120)  | 0.77  |
| Esterified | Cell  | EPA | Diol    | 11(12)-DiHETE  | 60 | 11.9 (4.7, 30.2)      | 8.8 (3.4, 22.3)       | -26% (-91, 491)  | >0.80 |
| NEOx       | Cell  | EPA | Diol    | 11(12)-DiHETE  | 0  | 8.67 (3.97, 18.94)    | 3.11 (1.42, 6.79)     | -64% (-93, 81)   | 0.40  |
| NEOx       | Cell  | EPA | Diol    | 11(12)-DiHETE  | 15 | 7.91 (4.55, 13.76)    | 3.47 (1.99, 6.03)     | -56% (-86, 33)   | 0.23  |
| NEOx       | Cell  | EPA | Diol    | 11(12)-DiHETE  | 30 | 7.4 (4.02, 13.62)     | 3.97 (2.16, 7.3)      | -46% (-80, 42)   | 0.39  |

|            |       |     |         |                |    |                      |                     |       |                  |       |
|------------|-------|-----|---------|----------------|----|----------------------|---------------------|-------|------------------|-------|
| NEOx       | Cell  | EPA | Diol    | 11(12)-DiHETE  | 60 | 6.95 (2.94, 16.44)   | 5.57 (2.36, 13.17)  |       | -20% (-88, 453)  | >0.80 |
| Esterified | Media | EPA | Diol    | 11(12)-DiHETE  | 0  | 3.19 (1.24, 8.17)    | 3.78 (1.47, 9.67)   | 0.55  | 18% (-81, 656)   | >0.80 |
| Esterified | Media | EPA | Diol    | 11(12)-DiHETE  | 15 | 2.82 (1.72, 4.63)    | 2.8 (1.71, 4.6)     |       | -1% (-62, 156)   | >0.80 |
| Esterified | Media | EPA | Diol    | 11(12)-DiHETE  | 30 | 3.18 (1.69, 6)       | 2.65 (1.4, 4.99)    |       | -17% (-55, 56)   | >0.80 |
| Esterified | Media | EPA | Diol    | 11(12)-DiHETE  | 60 | 8.26 (2.85, 23.95)   | 4.83 (1.66, 14)     |       | -42% (-94, 506)  | >0.80 |
| NEOx       | Media | EPA | Diol    | 11(12)-DiHETE  | 0  | 6.8 (3.06, 15.09)    | 2.42 (1.09, 5.37)   | 0.05  | -64% (-93, 89)   | 0.42  |
| NEOx       | Media | EPA | Diol    | 11(12)-DiHETE  | 15 | 5.68 (2.78, 11.64)   | 2.9 (1.42, 5.94)    |       | -49% (-87, 102)  | 0.68  |
| NEOx       | Media | EPA | Diol    | 11(12)-DiHETE  | 30 | 5 (2.42, 10.35)      | 3.66 (1.77, 7.58)   |       | -27% (-80, 172)  | >0.80 |
| NEOx       | Media | EPA | Diol    | 11(12)-DiHETE  | 60 | 4.51 (1.95, 10.45)   | 6.8 (2.94, 15.75)   |       | 51% (-77, 876)   | >0.80 |
| Esterified | Cell  | AA  | Diol    | 11(12)-DiHETrE | 0  | 14.3 (6.6, 31.1)     | 5.8 (2.7, 12.7)     | 0.63  | -59% (-91, 96)   | 0.52  |
| Esterified | Cell  | AA  | Diol    | 11(12)-DiHETrE | 15 | 15.1 (9.5, 24.1)     | 6.9 (4.4, 11)       |       | -54% (-82, 15)   | 0.13  |
| Esterified | Cell  | AA  | Diol    | 11(12)-DiHETrE | 30 | 14.9 (8.6, 25.9)     | 7.6 (4.4, 13.3)     |       | -49% (-75, 6)    | 0.08  |
| Esterified | Cell  | AA  | Diol    | 11(12)-DiHETrE | 60 | 11.5 (4.8, 27.5)     | 7.4 (3.1, 17.7)     |       | -36% (-91, 346)  | >0.80 |
| NEOx       | Cell  | AA  | Diol    | 11(12)-DiHETrE | 0  | 9.9 (3.78, 25.91)    | 15.29 (5.84, 40.01) | 0.01  | 54% (-78, 969)   | >0.80 |
| NEOx       | Cell  | AA  | Diol    | 11(12)-DiHETrE | 15 | 8.58 (3.3, 22.33)    | 8.71 (3.35, 22.66)  |       | 1% (-83, 496)    | >0.80 |
| NEOx       | Cell  | AA  | Diol    | 11(12)-DiHETrE | 30 | 9.9 (3.82, 25.63)    | 6.6 (2.55, 17.1)    |       | -33% (-88, 278)  | >0.80 |
| NEOx       | Cell  | AA  | Diol    | 11(12)-DiHETrE | 60 | 31.09 (11.71, 82.51) | 8.96 (3.38, 23.78)  |       | -71% (-96, 125)  | 0.45  |
| Esterified | Media | AA  | Diol    | 11(12)-DiHETrE | 0  | 5.69 (2.3, 14.09)    | 4.7 (1.9, 11.65)    | 0.7   | -17% (-87, 443)  | >0.80 |
| Esterified | Media | AA  | Diol    | 11(12)-DiHETrE | 15 | 6.32 (2.7, 14.81)    | 5.59 (2.39, 13.1)   |       | -12% (-82, 345)  | >0.80 |
| Esterified | Media | AA  | Diol    | 11(12)-DiHETrE | 30 | 6.82 (2.9, 16.03)    | 6.46 (2.74, 15.18)  |       | -5% (-80, 349)   | >0.80 |
| Esterified | Media | AA  | Diol    | 11(12)-DiHETrE | 60 | 7.23 (2.81, 18.56)   | 7.84 (3.05, 20.14)  |       | 9% (-86, 763)    | >0.80 |
| NEOx       | Media | AA  | Diol    | 11(12)-DiHETrE | 0  | 9.46 (4.55, 19.65)   | 5.83 (2.81, 12.11)  | 0.13  | -38% (-86, 175)  | >0.80 |
| NEOx       | Media | AA  | Diol    | 11(12)-DiHETrE | 15 | 5.93 (3.69, 9.52)    | 5.09 (3.17, 8.18)   |       | -14% (-67, 123)  | >0.80 |
| NEOx       | Media | AA  | Diol    | 11(12)-DiHETrE | 30 | 4.69 (2.72, 8.07)    | 5.61 (3.26, 9.67)   |       | 20% (-46, 167)   | >0.80 |
| NEOx       | Media | AA  | Diol    | 11(12)-DiHETrE | 60 | 5.88 (2.61, 13.26)   | 13.68 (6.07, 30.85) |       | 133% (-62, 1331) | 0.73  |
| Esterified | Cell  | EPA | Epoxide | 11(12)-EpETE   | 0  | 0.3 (0.17, 0.55)     | 0.4 (0.22, 0.74)    | 0.24  | 34% (-61, 364)   | >0.80 |
| Esterified | Cell  | EPA | Epoxide | 11(12)-EpETE   | 15 | 0.29 (0.16, 0.5)     | 0.33 (0.19, 0.59)   |       | 17% (-80, 239)   | >0.80 |
| Esterified | Cell  | EPA | Epoxide | 11(12)-EpETE   | 30 | 0.29 (0.17, 0.51)    | 0.3 (0.17, 0.52)    |       | 1% (-64, 183)    | >0.80 |
| Esterified | Cell  | EPA | Epoxide | 11(12)-EpETE   | 60 | 0.37 (0.2, 0.7)      | 0.29 (0.15, 0.53)   |       | -24% (-80, 199)  | >0.80 |
| NEOx       | Cell  | EPA | Epoxide | 11(12)-EpETE   | 0  | 0.39 (0.24, 0.64)    | 0.44 (0.27, 0.71)   | 0.42  | 11% (-60, 206)   | >0.80 |
| NEOx       | Cell  | EPA | Epoxide | 11(12)-EpETE   | 15 | 0.33 (0.23, 0.5)     | 0.34 (0.23, 0.5)    |       | 1% (-54, 119)    | >0.80 |
| NEOx       | Cell  | EPA | Epoxide | 11(12)-EpETE   | 30 | 0.31 (0.21, 0.47)    | 0.28 (0.19, 0.43)   |       | -9% (-55, 87)    | >0.80 |
| NEOx       | Cell  | EPA | Epoxide | 11(12)-EpETE   | 60 | 0.35 (0.21, 0.59)    | 0.27 (0.16, 0.45)   |       | -25% (-77, 142)  | >0.80 |
| Esterified | Media | EPA | Epoxide | 11(12)-EpETE   | 0  | 0.32 (0.2, 0.52)     | 0.23 (0.14, 0.37)   | >0.80 | -29% (-74, 99)   | >0.80 |
| Esterified | Media | EPA | Epoxide | 11(12)-EpETE   | 15 | 0.5 (0.32, 0.77)     | 0.35 (0.23, 0.54)   |       | -29% (-69, 63)   | >0.80 |
| Esterified | Media | EPA | Epoxide | 11(12)-EpETE   | 30 | 0.59 (0.38, 0.91)    | 0.41 (0.26, 0.64)   |       | -30% (-68, 55)   | 0.76  |
| Esterified | Media | EPA | Epoxide | 11(12)-EpETE   | 60 | 0.35 (0.21, 0.59)    | 0.24 (0.15, 0.41)   |       | -31% (-78, 118)  | >0.80 |
| NEOx       | Media | EPA | Epoxide | 11(12)-EpETE   | 0  | 0.34 (0.2, 0.57)     | 0.28 (0.16, 0.47)   | 0.21  | 23% (-58, 257)   | >0.80 |
| NEOx       | Media | EPA | Epoxide | 11(12)-EpETE   | 15 | 0.35 (0.21, 0.58)    | 0.32 (0.19, 0.53)   |       | 9% (-58, 183)    | >0.80 |
| NEOx       | Media | EPA | Epoxide | 11(12)-EpETE   | 30 | 0.34 (0.2, 0.56)     | 0.35 (0.21, 0.58)   |       | -3% (-61, 146)   | >0.80 |
| NEOx       | Media | EPA | Epoxide | 11(12)-EpETE   | 60 | 0.26 (0.15, 0.44)    | 0.33 (0.19, 0.57)   |       | -23% (-76, 145)  | >0.80 |
| Esterified | Cell  | AA  | Epoxide | 11(12)-EpETrE  | 0  | 0.19 (0.09, 0.41)    | 0.21 (0.1, 0.46)    | >0.80 | 11% (-77, 446)   | >0.80 |
| Esterified | Cell  | AA  | Epoxide | 11(12)-EpETrE  | 15 | 0.14 (0.07, 0.25)    | 0.15 (0.08, 0.28)   |       | 13% (-66, 277)   | >0.80 |
| Esterified | Cell  | AA  | Epoxide | 11(12)-EpETrE  | 30 | 0.12 (0.06, 0.23)    | 0.14 (0.07, 0.26)   |       | 14% (-62, 248)   | >0.80 |
| Esterified | Cell  | AA  | Epoxide | 11(12)-EpETrE  | 60 | 0.17 (0.08, 0.39)    | 0.2 (0.09, 0.45)    |       | 17% (-81, 637)   | >0.80 |
| NEOx       | Cell  | AA  | Epoxide | 11(12)-EpETrE  | 0  | 0.09 (0.04, 0.18)    | 0.07 (0.04, 0.15)   | 0.42  | -19% (-82, 261)  | >0.80 |
| NEOx       | Cell  | AA  | Epoxide | 11(12)-EpETrE  | 15 | 0.09 (0.04, 0.17)    | 0.08 (0.04, 0.16)   |       | -9% (-75, 231)   | >0.80 |
| NEOx       | Cell  | AA  | Epoxide | 11(12)-EpETrE  | 30 | 0.09 (0.05, 0.18)    | 0.09 (0.05, 0.18)   |       | 2% (-71, 254)    | >0.80 |
| NEOx       | Cell  | AA  | Epoxide | 11(12)-EpETrE  | 60 | 0.11 (0.05, 0.23)    | 0.14 (0.07, 0.29)   |       | 27% (-75, 552)   | >0.80 |
| Esterified | Media | AA  | Epoxide | 11(12)-EpETrE  | 0  | 0.11 (0.05, 0.22)    | 0.12 (0.06, 0.25)   | 0.69  | 12% (-75, 402)   | >0.80 |
| Esterified | Media | AA  | Epoxide | 11(12)-EpETrE  | 15 | 0.1 (0.06, 0.17)     | 0.1 (0.06, 0.17)    |       | 4% (-64, 202)    | >0.80 |
| Esterified | Media | AA  | Epoxide | 11(12)-EpETrE  | 30 | 0.1 (0.06, 0.18)     | 0.09 (0.05, 0.17)   |       | -4% (-63, 150)   | >0.80 |
| Esterified | Media | AA  | Epoxide | 11(12)-EpETrE  | 60 | 0.15 (0.07, 0.32)    | 0.12 (0.06, 0.27)   |       | -18% (-86, 380)  | >0.80 |
| NEOx       | Media | AA  | Epoxide | 11(12)-EpETrE  | 0  | 0.07 (0.04, 0.14)    | 0.12 (0.06, 0.22)   | 0.1   | 57% (-56, 466)   | >0.80 |
| NEOx       | Media | AA  | Epoxide | 11(12)-EpETrE  | 15 | 0.11 (0.07, 0.18)    | 0.13 (0.09, 0.2)    |       | 16% (-51, 173)   | >0.80 |
| NEOx       | Media | AA  | Epoxide | 11(12)-EpETrE  | 30 | 0.15 (0.09, 0.24)    | 0.13 (0.08, 0.21)   |       | -14% (-59, 80)   | >0.80 |
| NEOx       | Media | AA  | Epoxide | 11(12)-EpETrE  | 60 | 0.15 (0.08, 0.31)    | 0.07 (0.04, 0.14)   |       | -53% (-90, 117)  | 0.67  |
| Esterified | Cell  | DHA | Alcohol | 11-HDoHE       | 0  | 1.69 (0.76, 3.76)    | 2.21 (0.99, 4.93)   | 0.26  | 31% (-75, 601)   | >0.80 |
| Esterified | Cell  | DHA | Alcohol | 11-HDoHE       | 15 | 2.13 (1.14, 3.97)    | 2.2 (1.18, 4.09)    |       | 3% (-70, 255)    | >0.80 |
| Esterified | Cell  | DHA | Alcohol | 11-HDoHE       | 30 | 2.77 (1.43, 5.36)    | 2.25 (1.16, 4.36)   |       | -19% (-74, 151)  | >0.80 |
| Esterified | Cell  | DHA | Alcohol | 11-HDoHE       | 60 | 5.11 (2.14, 12.21)   | 2.57 (1.08, 6.15)   |       | -50% (-93, 257)  | >0.80 |
| NEOx       | Cell  | DHA | Alcohol | 11-HDoHE       | 0  | 0.24 (0.13, 0.42)    | 0.17 (0.1, 0.31)    | 0.79  | -27% (-78, 147)  | >0.80 |
| NEOx       | Cell  | DHA | Alcohol | 11-HDoHE       | 15 | 0.27 (0.17, 0.44)    | 0.21 (0.13, 0.34)   |       | -24% (-70, 96)   | >0.80 |
| NEOx       | Cell  | DHA | Alcohol | 11-HDoHE       | 30 | 0.3 (0.18, 0.5)      | 0.24 (0.14, 0.39)   |       | -21% (-67, 91)   | >0.80 |
| NEOx       | Cell  | DHA | Alcohol | 11-HDoHE       | 60 | 0.32 (0.17, 0.59)    | 0.27 (0.15, 0.51)   |       | -15% (-79, 245)  | >0.80 |
| Esterified | Media | DHA | Alcohol | 11-HDoHE       | 0  | 0.3 (0.18, 0.49)     | 0.3 (0.18, 0.51)    | 0.66  | 3% (-64, 199)    | >0.80 |
| Esterified | Media | DHA | Alcohol | 11-HDoHE       | 15 | 0.21 (0.14, 0.32)    | 0.2 (0.13, 0.32)    |       | -2% (-58, 128)   | >0.80 |
| Esterified | Media | DHA | Alcohol | 11-HDoHE       | 30 | 0.2 (0.13, 0.31)     | 0.18 (0.12, 0.29)   |       | -7% (-58, 108)   | >0.80 |
| Esterified | Media | DHA | Alcohol | 11-HDoHE       | 60 | 0.41 (0.24, 0.7)     | 0.34 (0.2, 0.59)    |       | -16% (-75, 180)  | >0.80 |
| NEOx       | Media | DHA | Alcohol | 11-HDoHE       | 0  | 0.34 (0.21, 0.55)    | 0.29 (0.18, 0.47)   | 0.69  | -15% (-68, 125)  | >0.80 |
| NEOx       | Media | DHA | Alcohol | 11-HDoHE       | 15 | 0.27 (0.17, 0.42)    | 0.22 (0.14, 0.35)   |       | -18% (-65, 96)   | >0.80 |
| NEOx       | Media | DHA | Alcohol | 11-HDoHE       | 30 | 0.23 (0.15, 0.37)    | 0.19 (0.12, 0.29)   |       | -20% (-66, 85)   | >0.80 |
| NEOx       | Media | DHA | Alcohol | 11-HDoHE       | 60 | 0.25 (0.16, 0.41)    | 0.19 (0.12, 0.31)   |       | -25% (-74, 113)  | >0.80 |
| Esterified | Cell  | EPA | Diol    | 14(15)-DiHETE  | 0  | 1.5 (0.4, 6)         | 4 (1, 15.9)         | 0.1   | 163% (-85, 4565) | >0.80 |
| Esterified | Cell  | EPA | Diol    | 14(15)-DiHETE  | 15 | 5.3 (1.9, 14.8)      | 7.4 (2.7, 20.6)     |       | 39% (-82, 978)   | >0.80 |
| Esterified | Cell  | EPA | Diol    | 14(15)-DiHETE  | 30 | 12.4 (4.1, 37.4)     | 9.1 (3, 27.7)       |       | -26% (-88, 363)  | >0.80 |
| Esterified | Cell  | EPA | Diol    | 14(15)-DiHETE  | 60 | 19.5 (4.3, 88.4)     | 4.1 (0.9, 18.4)     |       | -79% (-99, 522)  | 0.74  |
| NEOx       | Cell  | EPA | Diol    | 14(15)-DiHETE  | 0  | 7.56 (3.37, 16.95)   | 5.43 (2.42, 12.18)  | >0.80 | -28% (-86, 261)  | >0.80 |
| NEOx       | Cell  | EPA | Diol    | 14(15)-DiHETE  | 15 | 7.26 (4.6, 11.46)    | 4.93 (3.13, 7.78)   |       | -32% (-72, 67)   | 0.8   |
| NEOx       | Cell  | EPA | Diol    | 14(15)-DiHETE  | 30 | 8.87 (5.06, 15.56)   | 5.69 (3.24, 9.98)   |       | -36% (-67, 26)   | 0.35  |
| NEOx       | Cell  | EPA | Diol    | 14(15)-DiHETE  | 60 | 27.18 (10.94, 67.48) | 15.57 (6.27, 38.66) |       | -43% (-92, 328)  | >0.80 |
| Esterified | Media | EPA | Diol    | 14(15)-DiHETE  | 0  | 1.33 (0.37, 4.81)    | 2.69 (0.74, 9.71)   | >0.80 | 102% (-84, 2469) | >0.80 |
| Esterified | Media | EPA | Diol    | 14(15)-DiHETE  | 15 | 2.75 (1.38, 5.49)    | 5.06 (2.53, 10.11)  |       | 84% (-52, 606)   | 0.75  |
| Esterified | Media | EPA | Diol    | 14(15)-DiHETE  | 30 | 4.64 (1.93, 11.13)   | 7.8 (3.25, 18.71)   |       | 68% (-34, 328)   | 0.55  |
| Esterified | Media | EPA | Diol    | 14(15)-DiHETE  | 60 | 7.26 (1.7, 30.96)    | 10.15 (2.38, 43.32) |       | 40% (-94, 3311)  | >0.80 |

|            |       |     |            |               |    |                        |                       |       |                   |       |
|------------|-------|-----|------------|---------------|----|------------------------|-----------------------|-------|-------------------|-------|
| NEOx       | Media | EPA | Diol       | 14(15)-DIHETE | 0  | 7.33 (2.62, 20.51)     | 7.04 (2.52, 19.7)     | 0.35  | -4% (-89, 729)    | >0.80 |
| NEOx       | Media | EPA | Diol       | 14(15)-DIHETE | 15 | 3.99 (1.62, 9.84)      | 4.78 (1.94, 11.79)    |       | 20% (-79, 586)    | >0.80 |
| NEOx       | Media | EPA | Diol       | 14(15)-DIHETE | 30 | 2.99 (1.19, 7.51)      | 4.47 (1.78, 11.24)    |       | 50% (-71, 679)    | >0.80 |
| NEOx       | Media | EPA | Diol       | 14(15)-DIHETE | 60 | 4.37 (1.47, 13.01)     | 10.19 (3.42, 30.3)    |       | 133% (-80, 2560)  | >0.80 |
| Esterified | Cell  | AA  | Prostanoid | 15-deoxy-PGJ2 | 0  | 26 (13, 52)            | 32 (16, 64)           | 0.56  | 24% (-71, 436)    | >0.80 |
| Esterified | Cell  | AA  | Prostanoid | 15-deoxy-PGJ2 | 15 | 39 (23, 67)            | 43 (25, 75)           |       | 11% (-62, 225)    | >0.80 |
| Esterified | Cell  | AA  | Prostanoid | 15-deoxy-PGJ2 | 30 | 54 (30, 96)            | 54 (30, 96)           |       | 0% (-63, 165)     | >0.80 |
| Esterified | Cell  | AA  | Prostanoid | 15-deoxy-PGJ2 | 60 | 78 (36, 167)           | 62 (29, 134)          |       | -20% (-86, 345)   | >0.80 |
| NEOx       | Cell  | AA  | Prostanoid | 15-deoxy-PGJ2 | 0  | 28.74 (12.44, 66.38)   | 33.29 (14.41, 76.89)  | 0.55  | 16% (-80, 571)    | >0.80 |
| NEOx       | Cell  | AA  | Prostanoid | 15-deoxy-PGJ2 | 15 | 22.03 (10.87, 44.64)   | 28.8 (14.21, 58.36)   |       | 31% (-67, 419)    | >0.80 |
| NEOx       | Cell  | AA  | Prostanoid | 15-deoxy-PGJ2 | 30 | 18.07 (8.71, 37.49)    | 26.66 (12.85, 55.31)  |       | 48% (-59, 436)    | >0.80 |
| NEOx       | Cell  | AA  | Prostanoid | 15-deoxy-PGJ2 | 60 | 14.9 (6.09, 36.47)     | 28.01 (11.44, 68.55)  |       | 88% (-75, 1299)   | >0.80 |
| Esterified | Media | AA  | Prostanoid | 15-deoxy-PGJ2 | 0  | 50.61 (23.3, 109.91)   | 41.49 (19.1, 90.11)   | 0.45  | -18% (-84, 315)   | >0.80 |
| Esterified | Media | AA  | Prostanoid | 15-deoxy-PGJ2 | 15 | 60.86 (33.41, 110.84)  | 42.78 (23.49, 77.92)  |       | -30% (-79, 131)   | >0.80 |
| Esterified | Media | AA  | Prostanoid | 15-deoxy-PGJ2 | 30 | 69.18 (36.54, 130.95)  | 41.69 (22.03, 78.93)  |       | -40% (-80, 78)    | 0.73  |
| Esterified | Media | AA  | Prostanoid | 15-deoxy-PGJ2 | 60 | 75.48 (32.49, 175.39)  | 33.45 (14.39, 77.71)  |       | -56% (-93, 195)   | 0.80  |
| NEOx       | Media | AA  | Prostanoid | 15-deoxy-PGJ2 | 0  | 31.7 (12.41, 80.95)    | 22.36 (8.75, 57.09)   | 0.26  | -29% (-90, 400)   | >0.80 |
| NEOx       | Media | AA  | Prostanoid | 15-deoxy-PGJ2 | 15 | 45.2 (21.9, 93.27)     | 42.22 (20.46, 87.11)  |       | -7% (-78, 293)    | >0.80 |
| NEOx       | Media | AA  | Prostanoid | 15-deoxy-PGJ2 | 30 | 45.66 (21.12, 98.73)   | 56.48 (26.12, 122.13) |       | 24% (-67, 358)    | >0.80 |
| NEOx       | Media | AA  | Prostanoid | 15-deoxy-PGJ2 | 60 | 16.57 (5.98, 45.91)    | 35.94 (12.97, 99.62)  |       | 117% (-78, 2048)  | >0.80 |
| Esterified | Cell  | EPA | Alcohol    | 15-HEPE       | 0  | 0.7 (0.35, 1.41)       | 0.51 (0.26, 1.03)     | 0.5   | -26% (-83, 214)   | >0.80 |
| Esterified | Cell  | EPA | Alcohol    | 15-HEPE       | 15 | 0.78 (0.47, 1.29)      | 0.5 (0.3, 0.83)       |       | -35% (-76, 77)    | 0.79  |
| Esterified | Cell  | EPA | Alcohol    | 15-HEPE       | 30 | 0.79 (0.46, 1.37)      | 0.45 (0.26, 0.78)     |       | -43% (-77, 39)    | 0.40  |
| Esterified | Cell  | EPA | Alcohol    | 15-HEPE       | 60 | 0.61 (0.28, 1.32)      | 0.27 (0.12, 0.58)     |       | -56% (-92, 147)   | 0.71  |
| NEOx       | Cell  | EPA | Alcohol    | 15-HEPE       | 0  | 0.73 (0.31, 1.73)      | 0.45 (0.19, 1.06)     | 0.4   | -39% (-90, 270)   | >0.80 |
| NEOx       | Cell  | EPA | Alcohol    | 15-HEPE       | 15 | 0.71 (0.31, 1.59)      | 0.5 (0.22, 1.13)      |       | -29% (-85, 230)   | >0.80 |
| NEOx       | Cell  | EPA | Alcohol    | 15-HEPE       | 30 | 0.72 (0.32, 1.63)      | 0.59 (0.26, 1.33)     |       | -18% (-81, 260)   | >0.80 |
| NEOx       | Cell  | EPA | Alcohol    | 15-HEPE       | 60 | 0.86 (0.35, 2.12)      | 0.95 (0.38, 2.32)     |       | 9% (-85, 691)     | >0.80 |
| Esterified | Media | EPA | Alcohol    | 15-HEPE       | 0  | 0.45 (0.23, 0.87)      | 0.53 (0.27, 1.04)     | 0.29  | 19% (-71, 385)    | >0.80 |
| Esterified | Media | EPA | Alcohol    | 15-HEPE       | 15 | 0.43 (0.25, 0.74)      | 0.43 (0.25, 0.74)     |       | 0% (-66, 195)     | >0.80 |
| Esterified | Media | EPA | Alcohol    | 15-HEPE       | 30 | 0.46 (0.26, 0.81)      | 0.38 (0.22, 0.68)     |       | -16% (-69, 130)   | >0.80 |
| Esterified | Media | EPA | Alcohol    | 15-HEPE       | 60 | 0.73 (0.35, 1.49)      | 0.43 (0.21, 0.88)     |       | -41% (-88, 196)   | >0.80 |
| NEOx       | Media | EPA | Alcohol    | 15-HEPE       | 0  | 1.07 (0.55, 2.07)      | 0.63 (0.33, 1.22)     | 0.22  | -41% (-85, 134)   | >0.80 |
| NEOx       | Media | EPA | Alcohol    | 15-HEPE       | 15 | 0.68 (0.4, 1.15)       | 0.49 (0.29, 0.84)     |       | -27% (-74, 105)   | >0.80 |
| NEOx       | Media | EPA | Alcohol    | 15-HEPE       | 30 | 0.5 (0.29, 0.87)       | 0.45 (0.26, 0.78)     |       | -10% (-65, 133)   | >0.80 |
| NEOx       | Media | EPA | Alcohol    | 15-HEPE       | 60 | 0.43 (0.21, 0.88)      | 0.59 (0.29, 1.2)      |       | 37% (-72, 576)    | >0.80 |
| Esterified | Cell  | DHA | Alcohol    | 16-HDoHE      | 0  | 1.1 (0.35, 3.43)       | 0.77 (0.25, 2.41)     | 0.8   | -30% (-93, 576)   | >0.80 |
| Esterified | Cell  | DHA | Alcohol    | 16-HDoHE      | 15 | 1.51 (0.8, 2.86)       | 1.16 (0.61, 2.19)     |       | -23% (-78, 169)   | >0.80 |
| Esterified | Cell  | DHA | Alcohol    | 16-HDoHE      | 30 | 1.74 (0.79, 3.83)      | 1.47 (0.67, 3.22)     |       | -16% (-67, 113)   | >0.80 |
| Esterified | Cell  | DHA | Alcohol    | 16-HDoHE      | 60 | 1.38 (0.38, 4.95)      | 1.39 (0.39, 4.97)     |       | 1% (-94, 1594)    | >0.80 |
| NEOx       | Cell  | DHA | Alcohol    | 16-HDoHE      | 0  | 0.12 (0.06, 0.25)      | 0.05 (0.03, 0.11)     | >0.80 | -55% (-90, 94)    | 0.56  |
| NEOx       | Cell  | DHA | Alcohol    | 16-HDoHE      | 15 | 0.13 (0.09, 0.2)       | 0.06 (0.04, 0.09)     |       | -56% (-81, 3)     | 0.06  |
| NEOx       | Cell  | DHA | Alcohol    | 16-HDoHE      | 30 | 0.14 (0.08, 0.24)      | 0.06 (0.04, 0.1)      |       | -58% (-78, -16)   | 0.009 |
| NEOx       | Cell  | DHA | Alcohol    | 16-HDoHE      | 60 | 0.14 (0.06, 0.31)      | 0.06 (0.02, 0.12)     |       | -60% (-93, 143)   | 0.64  |
| Esterified | Media | DHA | Alcohol    | 16-HDoHE      | 0  | 0.11 (0.04, 0.26)      | 0.06 (0.02, 0.14)     | 0.2   | -46% (-91, 235)   | >0.80 |
| Esterified | Media | DHA | Alcohol    | 16-HDoHE      | 15 | 0.08 (0.04, 0.15)      | 0.06 (0.03, 0.11)     |       | -26% (-80, 172)   | >0.80 |
| Esterified | Media | DHA | Alcohol    | 16-HDoHE      | 30 | 0.06 (0.03, 0.12)      | 0.06 (0.03, 0.12)     |       | 0% (-69, 226)     | >0.80 |
| Esterified | Media | DHA | Alcohol    | 16-HDoHE      | 60 | 0.05 (0.02, 0.12)      | 0.09 (0.03, 0.22)     |       | 87% (-78, 1507)   | >0.80 |
| NEOx       | Media | DHA | Alcohol    | 16-HDoHE      | 0  | 0.07 (0.03, 0.15)      | 0.05 (0.02, 0.11)     | 0.3   | -29% (-85, 244)   | >0.80 |
| NEOx       | Media | DHA | Alcohol    | 16-HDoHE      | 15 | 0.06 (0.03, 0.13)      | 0.04 (0.02, 0.08)     |       | -39% (-84, 129)   | >0.80 |
| NEOx       | Media | DHA | Alcohol    | 16-HDoHE      | 30 | 0.07 (0.03, 0.13)      | 0.03 (0.02, 0.07)     |       | -48% (-86, 85)    | 0.62  |
| NEOx       | Media | DHA | Alcohol    | 16-HDoHE      | 60 | 0.11 (0.05, 0.23)      | 0.04 (0.02, 0.09)     |       | -63% (-93, 112)   | 0.52  |
| Esterified | Cell  | EPA | Diol       | 17(18)-DIHETE | 0  | 152 (63, 369)          | 197 (81, 477)         | >0.80 | 29% (-79, 680)    | >0.80 |
| Esterified | Cell  | EPA | Diol       | 17(18)-DIHETE | 15 | 70 (40, 121)           | 87 (50, 151)          |       | 25% (-58, 277)    | >0.80 |
| Esterified | Cell  | EPA | Diol       | 17(18)-DIHETE | 30 | 51 (27, 97)            | 62 (32, 118)          |       | 21% (-51, 198)    | >0.80 |
| Esterified | Cell  | EPA | Diol       | 17(18)-DIHETE | 60 | 112 (42, 301)          | 127 (47, 341)         |       | 13% (-87, 923)    | >0.80 |
| NEOx       | Cell  | EPA | Diol       | 17(18)-DIHETE | 0  | 74.75 (27.51, 203.09)  | 40.22 (14.8, 109.26)  | 0.62  | -46% (-93, 338)   | >0.80 |
| NEOx       | Cell  | EPA | Diol       | 17(18)-DIHETE | 15 | 97.79 (42.87, 223.09)  | 46.57 (20.41, 106.24) |       | -52% (-91, 140)   | 0.74  |
| NEOx       | Cell  | EPA | Diol       | 17(18)-DIHETE | 30 | 119.32 (50.58, 281.44) | 50.3 (21.32, 118.65)  |       | -58% (-91, 90)    | 0.51  |
| NEOx       | Cell  | EPA | Diol       | 17(18)-DIHETE | 60 | 144.11 (49.25, 421.67) | 47.61 (16.27, 139.3)  |       | -67% (-97, 268)   | 0.74  |
| Esterified | Media | EPA | Diol       | 17(18)-DIHETE | 0  | 29.46 (10.05, 86.41)   | 11.89 (4.05, 34.88)   | 0.29  | -60% (-96, 285)   | >0.80 |
| Esterified | Media | EPA | Diol       | 17(18)-DIHETE | 15 | 42.65 (17.61, 103.28)  | 22.93 (9.47, 55.54)   |       | -46% (-91, 205)   | >0.80 |
| Esterified | Media | EPA | Diol       | 17(18)-DIHETE | 30 | 49.19 (19.57, 123.61)  | 35.24 (14.02, 88.56)  |       | -28% (-86, 259)   | >0.80 |
| Esterified | Media | EPA | Diol       | 17(18)-DIHETE | 60 | 33.12 (10.42, 105.31)  | 42.12 (13.25, 133.93) |       | 27% (-91, 1609)   | >0.80 |
| NEOx       | Media | EPA | Diol       | 17(18)-DIHETE | 0  | 55.5 (24.83, 124.05)   | 84.09 (37.63, 187.95) | 0.74  | 52% (-71, 703)    | >0.80 |
| NEOx       | Media | EPA | Diol       | 17(18)-DIHETE | 15 | 27.46 (15.44, 48.84)   | 38.66 (21.73, 68.77)  |       | 41% (-56, 346)    | >0.80 |
| NEOx       | Media | EPA | Diol       | 17(18)-DIHETE | 30 | 19.56 (10.4, 36.79)    | 25.59 (13.61, 48.14)  |       | 31% (-53, 263)    | >0.80 |
| NEOx       | Media | EPA | Diol       | 17(18)-DIHETE | 60 | 29.65 (12.24, 71.78)   | 33.5 (13.84, 81.1)    |       | 13% (-84, 723)    | >0.80 |
| Esterified | Cell  | DHA | Alcohol    | 20-HDoHE      | 0  | 4.94 (2.19, 11.12)     | 3.96 (1.76, 8.93)     | >0.80 | -20% (-85, 319)   | >0.80 |
| Esterified | Cell  | DHA | Alcohol    | 20-HDoHE      | 15 | 6.14 (2.77, 13.61)     | 5.06 (2.28, 11.23)    |       | -18% (-81, 264)   | >0.80 |
| Esterified | Cell  | DHA | Alcohol    | 20-HDoHE      | 30 | 7.08 (3.2, 15.65)      | 6 (2.71, 13.26)       |       | -15% (-80, 261)   | >0.80 |
| Esterified | Cell  | DHA | Alcohol    | 20-HDoHE      | 60 | 7.5 (3.27, 17.19)      | 6.71 (2.93, 15.37)    |       | -11% (-85, 428)   | >0.80 |
| NEOx       | Cell  | DHA | Alcohol    | 20-HDoHE      | 0  | 0.16 (0.03, 0.75)      | 0.04 (0.01, 0.19)     | 0.77  | -75% (-99, 522)   | 0.79  |
| NEOx       | Cell  | DHA | Alcohol    | 20-HDoHE      | 15 | 0.11 (0.04, 0.31)      | 0.02 (0.01, 0.07)     |       | -78% (-97, 82)    | 0.26  |
| NEOx       | Cell  | DHA | Alcohol    | 20-HDoHE      | 30 | 0.09 (0.03, 0.31)      | 0.02 (0.01, 0.06)     |       | -81% (-97, 19)    | 0.09  |
| NEOx       | Cell  | DHA | Alcohol    | 20-HDoHE      | 60 | 0.15 (0.03, 0.84)      | 0.02 (0, 0.12)        |       | -85% (-100, 610)  | 0.67  |
| Esterified | Media | DHA | Alcohol    | 20-HDoHE      | 0  | 0.14 (0.03, 0.6)       | 0.1 (0.02, 0.43)      | 0.24  | -28% (-97, 1404)  | >0.80 |
| Esterified | Media | DHA | Alcohol    | 20-HDoHE      | 15 | 0.08 (0.02, 0.26)      | 0.08 (0.02, 0.28)     |       | 8% (-90, 1124)    | >0.80 |
| Esterified | Media | DHA | Alcohol    | 20-HDoHE      | 30 | 0.05 (0.01, 0.18)      | 0.08 (0.02, 0.3)      |       | 63% (-83, 1499)   | >0.80 |
| Esterified | Media | DHA | Alcohol    | 20-HDoHE      | 60 | 0.04 (0.01, 0.21)      | 0.17 (0.04, 0.78)     |       | 271% (-88, 11640) | >0.80 |
| NEOx       | Media | DHA | Alcohol    | 20-HDoHE      | 0  | 0.04 (0.01, 0.16)      | 0.06 (0.01, 0.23)     | 0.44  | 45% (-92, 2452)   | >0.80 |
| NEOx       | Media | DHA | Alcohol    | 20-HDoHE      | 15 | 0.07 (0.02, 0.21)      | 0.08 (0.02, 0.24)     |       | 12% (-88, 933)    | >0.80 |
| NEOx       | Media | DHA | Alcohol    | 20-HDoHE      | 30 | 0.08 (0.02, 0.24)      | 0.06 (0.02, 0.21)     |       | -14% (-89, 584)   | >0.80 |
| NEOx       | Media | DHA | Alcohol    | 20-HDoHE      | 60 | 0.02 (0.01, 0.11)      | 0.01 (0, 0.05)        |       | -49% (-98, 1288)  | >0.80 |
| Esterified | Cell  | AA  | Alcohol    | 20-HETE       | 0  | 0.37 (0.21, 0.64)      | 0.34 (0.2, 0.6)       | 0.3   | -6% (-71, 199)    | >0.80 |

|            |       |     |            |              |    |                       |                       |                  |       |
|------------|-------|-----|------------|--------------|----|-----------------------|-----------------------|------------------|-------|
| Esterified | Cell  | AA  | Alcohol    | 20-HETE      | 15 | 0.44 (0.28, 0.71)     | 0.36 (0.22, 0.58)     | -19% (-67, 104)  | >0.80 |
| Esterified | Cell  | AA  | Alcohol    | 20-HETE      | 30 | 0.51 (0.32, 0.84)     | 0.36 (0.22, 0.59)     | -29% (-70, 68)   | >0.80 |
| Esterified | Cell  | AA  | Alcohol    | 20-HETE      | 60 | 0.65 (0.36, 1.17)     | 0.35 (0.19, 0.63)     | -46% (-86, 102)  | 0.72  |
| NEOx       | Cell  | AA  | Alcohol    | 20-HETE      | 0  | 0.33 (0.2, 0.53)      | 0.27 (0.16, 0.43)     | -18% (-70, 122)  | >0.80 |
| NEOx       | Cell  | AA  | Alcohol    | 20-HETE      | 15 | 0.38 (0.24, 0.6)      | 0.3 (0.19, 0.47)      | -22% (-68, 86)   | >0.80 |
| NEOx       | Cell  | AA  | Alcohol    | 20-HETE      | 30 | 0.41 (0.26, 0.65)     | 0.3 (0.19, 0.48)      | -26% (-68, 73)   | >0.80 |
| NEOx       | Cell  | AA  | Alcohol    | 20-HETE      | 60 | 0.39 (0.23, 0.64)     | 0.26 (0.16, 0.43)     | -32% (-77, 102)  | >0.80 |
| Esterified | Media | AA  | Alcohol    | 20-HETE      | 0  | 0.36 (0.19, 0.67)     | 0.32 (0.17, 0.61)     | -10% (-75, 231)  | >0.80 |
| Esterified | Media | AA  | Alcohol    | 20-HETE      | 15 | 0.41 (0.22, 0.73)     | 0.37 (0.2, 0.67)      | -9% (-70, 180)   | >0.80 |
| Esterified | Media | AA  | Alcohol    | 20-HETE      | 30 | 0.43 (0.24, 0.78)     | 0.39 (0.22, 0.71)     | -8% (-69, 172)   | >0.80 |
| Esterified | Media | AA  | Alcohol    | 20-HETE      | 60 | 0.39 (0.2, 0.75)      | 0.36 (0.19, 0.7)      | -7% (-78, 286)   | >0.80 |
| NEOx       | Media | AA  | Alcohol    | 20-HETE      | 0  | 0.38 (0.18, 0.81)     | 0.28 (0.13, 0.6)      | -25% (-82, 211)  | >0.80 |
| NEOx       | Media | AA  | Alcohol    | 20-HETE      | 15 | 0.32 (0.15, 0.68)     | 0.25 (0.12, 0.55)     | -20% (-80, 220)  | >0.80 |
| NEOx       | Media | AA  | Alcohol    | 20-HETE      | 30 | 0.3 (0.14, 0.64)      | 0.26 (0.12, 0.55)     | -14% (-78, 241)  | >0.80 |
| NEOx       | Media | AA  | Alcohol    | 20-HETE      | 60 | 0.37 (0.17, 0.79)     | 0.37 (0.17, 0.78)     | -1% (-77, 327)   | >0.80 |
| Esterified | Cell  | DHA | Alcohol    | 22-HDoHE     | 0  | 0.34 (0.12, 0.97)     | 0.78 (0.28, 2.23)     | 130% (-74, 1921) | >0.80 |
| Esterified | Cell  | DHA | Alcohol    | 22-HDoHE     | 15 | 0.59 (0.22, 1.55)     | 1.01 (0.38, 2.64)     | 71% (-73, 975)   | >0.80 |
| Esterified | Cell  | DHA | Alcohol    | 22-HDoHE     | 30 | 0.99 (0.37, 2.62)     | 1.25 (0.47, 3.32)     | 27% (-78, 641)   | >0.80 |
| Esterified | Cell  | DHA | Alcohol    | 22-HDoHE     | 60 | 2.58 (0.87, 7.67)     | 1.8 (0.61, 5.37)      | -30% (-94, 678)  | >0.80 |
| NEOx       | Cell  | DHA | Alcohol    | 22-HDoHE     | 0  | 0.15 (0.07, 0.33)     | 0.1 (0.04, 0.21)      | -36% (-88, 237)  | >0.80 |
| NEOx       | Cell  | DHA | Alcohol    | 22-HDoHE     | 15 | 0.16 (0.08, 0.31)     | 0.11 (0.05, 0.22)     | -29% (-82, 175)  | >0.80 |
| NEOx       | Cell  | DHA | Alcohol    | 22-HDoHE     | 30 | 0.17 (0.09, 0.36)     | 0.14 (0.07, 0.28)     | -22% (-79, 182)  | >0.80 |
| NEOx       | Cell  | DHA | Alcohol    | 22-HDoHE     | 60 | 0.28 (0.12, 0.64)     | 0.26 (0.11, 0.6)      | -7% (-85, 496)   | >0.80 |
| Esterified | Media | DHA | Alcohol    | 22-HDoHE     | 0  | 0.14 (0.05, 0.38)     | 0.14 (0.05, 0.38)     | -1% (-88, 733)   | >0.80 |
| Esterified | Media | DHA | Alcohol    | 22-HDoHE     | 15 | 0.21 (0.08, 0.53)     | 0.19 (0.08, 0.5)      | -6% (-85, 469)   | >0.80 |
| Esterified | Media | DHA | Alcohol    | 22-HDoHE     | 30 | 0.28 (0.11, 0.72)     | 0.25 (0.09, 0.64)     | -11% (-84, 401)  | >0.80 |
| Esterified | Media | DHA | Alcohol    | 22-HDoHE     | 60 | 0.34 (0.12, 1)        | 0.27 (0.09, 0.8)      | -20% (-92, 746)  | >0.80 |
| NEOx       | Media | DHA | Alcohol    | 22-HDoHE     | 0  | 0.14 (0.06, 0.32)     | 0.08 (0.04, 0.18)     | -44% (-89, 195)  | >0.80 |
| NEOx       | Media | DHA | Alcohol    | 22-HDoHE     | 15 | 0.17 (0.08, 0.34)     | 0.1 (0.05, 0.2)       | -43% (-85, 125)  | >0.80 |
| NEOx       | Media | DHA | Alcohol    | 22-HDoHE     | 30 | 0.19 (0.09, 0.39)     | 0.11 (0.05, 0.23)     | -41% (-84, 115)  | >0.80 |
| NEOx       | Media | DHA | Alcohol    | 22-HDoHE     | 60 | 0.22 (0.1, 0.51)      | 0.14 (0.06, 0.31)     | -38% (-90, 296)  | >0.80 |
| Esterified | Cell  | AA  | Prostanoid | 6-keto-PGF1a | 0  | 80 (28, 227)          | 24 (8, 67)            | -71% (-97, 161)  | 0.54  |
| Esterified | Cell  | AA  | Prostanoid | 6-keto-PGF1a | 15 | 47 (20, 110)          | 19 (8, 45)            | -59% (-92, 118)  | 0.59  |
| Esterified | Cell  | AA  | Prostanoid | 6-keto-PGF1a | 30 | 33 (14, 81)           | 19 (8, 46)            | -44% (-88, 167)  | >0.80 |
| Esterified | Cell  | AA  | Prostanoid | 6-keto-PGF1a | 60 | 30 (10, 93)           | 33 (11, 100)          | 7% (-91, 1226)   | >0.80 |
| NEOx       | Cell  | AA  | Prostanoid | 6-keto-PGF1a | 0  | 22.26 (5.08, 97.54)   | 9.42 (2.15, 41.27)    | -58% (-98, 832)  | >0.80 |
| NEOx       | Cell  | AA  | Prostanoid | 6-keto-PGF1a | 15 | 13.46 (3.61, 50.25)   | 7.05 (1.89, 26.32)    | -48% (-96, 563)  | >0.80 |
| NEOx       | Cell  | AA  | Prostanoid | 6-keto-PGF1a | 30 | 10.94 (2.86, 41.75)   | 7.09 (1.86, 27.07)    | -35% (-94, 623)  | >0.80 |
| NEOx       | Cell  | AA  | Prostanoid | 6-keto-PGF1a | 60 | 17.5 (3.68, 83.23)    | 17.4 (3.66, 82.73)    | -1% (-97, 3105)  | >0.80 |
| Esterified | Media | AA  | Prostanoid | 6-keto-PGF1a | 0  | 17.19 (7.67, 38.51)   | 32.1 (14.32, 71.92)   | 87% (-66, 915)   | >0.80 |
| Esterified | Media | AA  | Prostanoid | 6-keto-PGF1a | 15 | 18.62 (9.33, 37.15)   | 32.65 (16.36, 65.14)  | 75% (-54, 573)   | >0.80 |
| Esterified | Media | AA  | Prostanoid | 6-keto-PGF1a | 30 | 20.71 (10.18, 42.14)  | 34.09 (16.75, 69.38)  | 65% (-53, 482)   | >0.80 |
| Esterified | Media | AA  | Prostanoid | 6-keto-PGF1a | 60 | 27.72 (11.73, 65.49)  | 40.22 (17.02, 95.04)  | 45% (-79, 896)   | >0.80 |
| NEOx       | Media | AA  | Prostanoid | 6-keto-PGF1a | 0  | 44.55 (17.65, 112.48) | 15.81 (6.26, 39.9)    | -65% (-95, 148)  | 0.59  |
| NEOx       | Media | AA  | Prostanoid | 6-keto-PGF1a | 15 | 40.21 (18.27, 88.48)  | 18.5 (8.41, 40.7)     | -54% (-90, 114)  | 0.65  |
| NEOx       | Media | AA  | Prostanoid | 6-keto-PGF1a | 30 | 32.37 (14.36, 72.95)  | 19.31 (8.57, 43.51)   | -40% (-86, 152)  | >0.80 |
| NEOx       | Media | AA  | Prostanoid | 6-keto-PGF1a | 60 | 14.88 (5.54, 39.97)   | 14.92 (5.55, 40.08)   | 0% (-89, 818)    | >0.80 |
| Esterified | Cell  | DHA | Epoxide    | 7(8)-EpDPE   | 0  | 1.6 (0.74, 3.48)      | 1.73 (0.8, 3.76)      | 8% (-78, 437)    | >0.80 |
| Esterified | Cell  | DHA | Epoxide    | 7(8)-EpDPE   | 15 | 1.31 (0.63, 2.73)     | 1.42 (0.68, 2.96)     | 8% (-73, 334)    | >0.80 |
| Esterified | Cell  | DHA | Epoxide    | 7(8)-EpDPE   | 30 | 1.27 (0.61, 2.65)     | 1.39 (0.67, 2.89)     | 9% (-71, 315)    | >0.80 |
| Esterified | Cell  | DHA | Epoxide    | 7(8)-EpDPE   | 60 | 2.01 (0.9, 4.48)      | 2.21 (0.99, 4.92)     | 10% (-81, 537)   | >0.80 |
| NEOx       | Cell  | DHA | Epoxide    | 7(8)-EpDPE   | 0  | 0.3 (0.21, 0.44)      | 0.18 (0.12, 0.26)     | -41% (-73, 30)   | 0.33  |
| NEOx       | Cell  | DHA | Epoxide    | 7(8)-EpDPE   | 15 | 0.27 (0.2, 0.37)      | 0.18 (0.13, 0.24)     | -35% (-65, 22)   | 0.31  |
| NEOx       | Cell  | DHA | Epoxide    | 7(8)-EpDPE   | 30 | 0.25 (0.18, 0.35)     | 0.18 (0.13, 0.25)     | -27% (-60, 30)   | 0.57  |
| NEOx       | Cell  | DHA | Epoxide    | 7(8)-EpDPE   | 60 | 0.24 (0.16, 0.36)     | 0.21 (0.14, 0.32)     | -10% (-64, 122)  | >0.80 |
| Esterified | Media | DHA | Epoxide    | 7(8)-EpDPE   | 0  | 0.28 (0.15, 0.53)     | 0.26 (0.13, 0.49)     | -8% (-75, 238)   | >0.80 |
| Esterified | Media | DHA | Epoxide    | 7(8)-EpDPE   | 15 | 0.22 (0.12, 0.42)     | 0.2 (0.11, 0.38)      | -10% (-72, 193)  | >0.80 |
| Esterified | Media | DHA | Epoxide    | 7(8)-EpDPE   | 30 | 0.22 (0.12, 0.42)     | 0.2 (0.1, 0.37)       | -12% (-72, 179)  | >0.80 |
| Esterified | Media | DHA | Epoxide    | 7(8)-EpDPE   | 60 | 0.38 (0.2, 0.74)      | 0.32 (0.17, 0.62)     | -16% (-79, 237)  | >0.80 |
| NEOx       | Media | DHA | Epoxide    | 7(8)-EpDPE   | 0  | 0.27 (0.19, 0.37)     | 0.22 (0.16, 0.31)     | -16% (-59, 70)   | >0.80 |
| NEOx       | Media | DHA | Epoxide    | 7(8)-EpDPE   | 15 | 0.24 (0.18, 0.33)     | 0.22 (0.16, 0.29)     | -11% (-50, 57)   | >0.80 |
| NEOx       | Media | DHA | Epoxide    | 7(8)-EpDPE   | 30 | 0.23 (0.17, 0.31)     | 0.22 (0.16, 0.29)     | -6% (-45, 61)    | >0.80 |
| NEOx       | Media | DHA | Epoxide    | 7(8)-EpDPE   | 60 | 0.23 (0.16, 0.33)     | 0.25 (0.17, 0.35)     | 5% (-53, 136)    | >0.80 |
| Esterified | Cell  | AA  | Diol       | 8(9)-DIHETRe | 0  | 18.9 (7.4, 47.9)      | 33.7 (13.3, 85.5)     | 79% (-74, 1147)  | >0.80 |
| Esterified | Cell  | AA  | Diol       | 8(9)-DIHETRe | 15 | 23.6 (11.5, 48.3)     | 30 (14.6, 61.4)       | 27% (-69, 427)   | >0.80 |
| Esterified | Cell  | AA  | Diol       | 8(9)-DIHETRe | 30 | 28.8 (13.4, 61.9)     | 26.1 (12.1, 56)       | -10% (-75, 230)  | >0.80 |
| Esterified | Cell  | AA  | Diol       | 8(9)-DIHETRe | 60 | 40.3 (14.7, 111)      | 18.5 (6.7, 50.8)      | -54% (-95, 346)  | >0.80 |
| NEOx       | Cell  | AA  | Diol       | 8(9)-DIHETRe | 0  | 26.41 (10.42, 66.89)  | 13.13 (5.18, 33.27)   | -50% (-93, 249)  | >0.80 |
| NEOx       | Cell  | AA  | Diol       | 8(9)-DIHETRe | 15 | 31.2 (14.2, 68.55)    | 20.75 (9.44, 45.59)   | -33% (-86, 209)  | >0.80 |
| NEOx       | Cell  | AA  | Diol       | 8(9)-DIHETRe | 30 | 34.05 (15.11, 76.74)  | 30.28 (13.44, 68.24)  | -11% (-79, 275)  | >0.80 |
| NEOx       | Cell  | AA  | Diol       | 8(9)-DIHETRe | 60 | 32.02 (11.86, 86.43)  | 50.91 (18.86, 137.42) | 59% (-83, 1373)  | >0.80 |
| Esterified | Media | AA  | Diol       | 8(9)-DIHETRe | 0  | 26.62 (11.38, 62.29)  | 23.24 (9.93, 54.39)   | -13% (-85, 420)  | >0.80 |
| Esterified | Media | AA  | Diol       | 8(9)-DIHETRe | 15 | 23.59 (11.47, 48.49)  | 19.43 (9.45, 39.95)   | -18% (-80, 236)  | >0.80 |
| Esterified | Media | AA  | Diol       | 8(9)-DIHETRe | 30 | 22.92 (10.9, 48.2)    | 17.82 (8.47, 37.47)   | -22% (-79, 190)  | >0.80 |
| Esterified | Media | AA  | Diol       | 8(9)-DIHETRe | 60 | 28.51 (11.5, 70.7)    | 19.73 (7.96, 48.94)   | -31% (-91, 430)  | >0.80 |
| NEOx       | Media | AA  | Diol       | 8(9)-DIHETRe | 0  | 21.43 (4.95, 92.75)   | 18.81 (4.35, 81.43)   | -12% (-96, 1627) | >0.80 |
| NEOx       | Media | AA  | Diol       | 8(9)-DIHETRe | 15 | 13.36 (3.17, 56.31)   | 11.57 (2.74, 48.77)   | -13% (-94, 1163) | >0.80 |
| NEOx       | Media | AA  | Diol       | 8(9)-DIHETRe | 30 | 10.96 (2.61, 45.95)   | 9.36 (2.23, 39.26)    | -15% (-94, 1069) | >0.80 |
| NEOx       | Media | AA  | Diol       | 8(9)-DIHETRe | 60 | 16.82 (3.77, 75.07)   | 13.99 (3.13, 62.42)   | -17% (-97, 1936) | >0.80 |
| Esterified | Cell  | AA  | Epoxide    | 8(9)-EpETRe  | 0  | 0.34 (0.19, 0.63)     | 0.35 (0.19, 0.64)     | 3% (-71, 268)    | >0.80 |
| Esterified | Cell  | AA  | Epoxide    | 8(9)-EpETRe  | 15 | 0.44 (0.26, 0.73)     | 0.42 (0.25, 0.7)      | -4% (-64, 159)   | >0.80 |
| Esterified | Cell  | AA  | Epoxide    | 8(9)-EpETRe  | 30 | 0.54 (0.32, 0.91)     | 0.48 (0.28, 0.81)     | -10% (-65, 126)  | >0.80 |
| Esterified | Cell  | AA  | Epoxide    | 8(9)-EpETRe  | 60 | 0.68 (0.36, 1.31)     | 0.53 (0.28, 1.02)     | -22% (-82, 236)  | >0.80 |
| NEOx       | Cell  | AA  | Epoxide    | 8(9)-EpETRe  | 0  | 0.28 (0.14, 0.53)     | 0.28 (0.14, 0.53)     | 0% (-74, 291)    | >0.80 |
| NEOx       | Cell  | AA  | Epoxide    | 8(9)-EpETRe  | 15 | 0.24 (0.14, 0.43)     | 0.26 (0.14, 0.46)     | 7% (-65, 225)    | >0.80 |



|            |       |      |            |             |    |                       |                       |      |                 |       |
|------------|-------|------|------------|-------------|----|-----------------------|-----------------------|------|-----------------|-------|
| NEOx       | Cell  | AA   | Epoxide    | 8(9)-EpETrE | 30 | 0.22 (0.12, 0.39)     | 0.25 (0.14, 0.44)     |      | 13% (-61, 226)  | >0.80 |
| NEOx       | Cell  | AA   | Epoxide    | 8(9)-EpETrE | 60 | 0.18 (0.09, 0.36)     | 0.23 (0.12, 0.46)     |      | 28% (-72, 488)  | >0.80 |
| Esterified | Media | AA   | Epoxide    | 8(9)-EpETrE | 0  | 0.19 (0.09, 0.37)     | 0.19 (0.1, 0.38)      | 0.45 | 2% (-76, 330)   | >0.80 |
| Esterified | Media | AA   | Epoxide    | 8(9)-EpETrE | 15 | 0.27 (0.15, 0.5)      | 0.24 (0.13, 0.45)     |      | -10% (-72, 192) | >0.80 |
| Esterified | Media | AA   | Epoxide    | 8(9)-EpETrE | 30 | 0.33 (0.18, 0.62)     | 0.27 (0.14, 0.5)      |      | -20% (-74, 143) | >0.80 |
| Esterified | Media | AA   | Epoxide    | 8(9)-EpETrE | 60 | 0.31 (0.15, 0.65)     | 0.2 (0.1, 0.41)       |      | -37% (-88, 222) | >0.80 |
| NEOx       | Media | AA   | Epoxide    | 8(9)-EpETrE | 0  | 0.26 (0.12, 0.58)     | 0.27 (0.12, 0.6)      | 0.71 | 3% (-80, 420)   | >0.80 |
| NEOx       | Media | AA   | Epoxide    | 8(9)-EpETrE | 15 | 0.27 (0.13, 0.57)     | 0.29 (0.14, 0.62)     |      | 8% (-74, 346)   | >0.80 |
| NEOx       | Media | AA   | Epoxide    | 8(9)-EpETrE | 30 | 0.27 (0.13, 0.56)     | 0.3 (0.14, 0.64)      |      | 14% (-71, 350)  | >0.80 |
| NEOx       | Media | AA   | Epoxide    | 8(9)-EpETrE | 60 | 0.24 (0.11, 0.54)     | 0.3 (0.13, 0.68)      |      | 28% (-78, 651)  | >0.80 |
| Esterified | Cell  | EPA  | Alcohol    | 9-HEPE      | 0  | 0.84 (0.52, 1.37)     | 0.55 (0.34, 0.9)      | 0.59 | -34% (-76, 83)  | >0.80 |
| Esterified | Cell  | EPA  | Alcohol    | 9-HEPE      | 15 | 0.93 (0.63, 1.37)     | 0.57 (0.39, 0.84)     |      | -39% (-71, 32)  | 0.39  |
| Esterified | Cell  | EPA  | Alcohol    | 9-HEPE      | 30 | 0.97 (0.65, 1.46)     | 0.56 (0.37, 0.84)     |      | -43% (-72, 16)  | 0.18  |
| Esterified | Cell  | EPA  | Alcohol    | 9-HEPE      | 60 | 0.91 (0.54, 1.55)     | 0.46 (0.27, 0.77)     |      | -50% (-85, 65)  | 0.49  |
| NEOx       | Cell  | EPA  | Alcohol    | 9-HEPE      | 0  | 0.63 (0.28, 1.43)     | 0.44 (0.19, 1)        | 0.59 | -30% (-87, 288) | >0.80 |
| NEOx       | Cell  | EPA  | Alcohol    | 9-HEPE      | 15 | 0.67 (0.34, 1.29)     | 0.42 (0.21, 0.81)     |      | -37% (-83, 130) | >0.80 |
| NEOx       | Cell  | EPA  | Alcohol    | 9-HEPE      | 30 | 0.74 (0.37, 1.49)     | 0.42 (0.21, 0.83)     |      | -44% (-83, 87)  | 0.70  |
| NEOx       | Cell  | EPA  | Alcohol    | 9-HEPE      | 60 | 1.08 (0.45, 2.6)      | 0.48 (0.2, 1.17)      |      | -55% (-94, 226) | >0.80 |
| Esterified | Media | EPA  | Alcohol    | 9-HEPE      | 0  | 0.4 (0.19, 0.84)      | 0.53 (0.25, 1.1)      | 0.56 | 30% (-71, 478)  | >0.80 |
| Esterified | Media | EPA  | Alcohol    | 9-HEPE      | 15 | 0.38 (0.19, 0.78)     | 0.53 (0.26, 1.09)     |      | 39% (-64, 433)  | >0.80 |
| Esterified | Media | EPA  | Alcohol    | 9-HEPE      | 30 | 0.38 (0.18, 0.77)     | 0.56 (0.27, 1.15)     |      | 49% (-60, 454)  | >0.80 |
| Esterified | Media | EPA  | Alcohol    | 9-HEPE      | 60 | 0.42 (0.2, 0.9)       | 0.73 (0.34, 1.54)     |      | 72% (-65, 754)  | >0.80 |
| NEOx       | Media | EPA  | Alcohol    | 9-HEPE      | 0  | 0.55 (0.35, 0.86)     | 0.51 (0.33, 0.8)      | 0.61 | -7% (-64, 139)  | >0.80 |
| NEOx       | Media | EPA  | Alcohol    | 9-HEPE      | 15 | 0.36 (0.25, 0.53)     | 0.36 (0.24, 0.52)     |      | -1% (-53, 106)  | >0.80 |
| NEOx       | Media | EPA  | Alcohol    | 9-HEPE      | 30 | 0.3 (0.2, 0.44)       | 0.31 (0.21, 0.46)     |      | 4% (-48, 107)   | >0.80 |
| NEOx       | Media | EPA  | Alcohol    | 9-HEPE      | 60 | 0.38 (0.23, 0.61)     | 0.44 (0.27, 0.71)     |      | 17% (-60, 242)  | >0.80 |
| Esterified | Cell  | DHA  | Diol       | Maresin 1   | 0  | 88 (44, 177)          | 29 (14, 58)           | 0.65 | -67% (-92, 35)  | 0.18  |
| Esterified | Cell  | DHA  | Diol       | Maresin 1   | 15 | 91 (59, 142)          | 33 (21, 51)           |      | -64% (-85, -13) | 0.02  |
| Esterified | Cell  | DHA  | Diol       | Maresin 1   | 30 | 96 (58, 161)          | 38 (23, 63)           |      | -61% (-81, -18) | 0.008 |
| Esterified | Cell  | DHA  | Diol       | Maresin 1   | 60 | 114 (52, 247)         | 54 (25, 116)          |      | -53% (-92, 166) | 0.79  |
| NEOx       | Cell  | DHA  | Diol       | Maresin 1   | 0  | 24.19 (6.64, 88.12)   | 23.42 (6.43, 85.29)   | 0.7  | -3% (-94, 1355) | >0.80 |
| NEOx       | Cell  | DHA  | Diol       | Maresin 1   | 15 | 24.6 (8.54, 70.88)    | 26.92 (9.34, 77.57)   |      | 9% (-86, 775)   | >0.80 |
| NEOx       | Cell  | DHA  | Diol       | Maresin 1   | 30 | 24.7 (8.19, 74.5)     | 30.56 (10.13, 92.16)  |      | 24% (-82, 751)  | >0.80 |
| NEOx       | Cell  | DHA  | Diol       | Maresin 1   | 60 | 23.98 (5.97, 96.34)   | 37.91 (9.44, 152.31)  |      | 58% (-93, 3496) | >0.80 |
| Esterified | Media | DHA  | Diol       | Maresin 1   | 0  | 31.63 (11.61, 86.21)  | 25.82 (9.48, 70.37)   | 0.74 | -18% (-89, 530) | >0.80 |
| Esterified | Media | DHA  | Diol       | Maresin 1   | 15 | 59.34 (31.43, 112.03) | 43.84 (23.22, 82.78)  |      | -26% (-79, 165) | >0.80 |
| Esterified | Media | DHA  | Diol       | Maresin 1   | 30 | 79.3 (37.95, 165.71)  | 53.03 (25.38, 110.83) |      | -33% (-77, 93)  | >0.80 |
| Esterified | Media | DHA  | Diol       | Maresin 1   | 60 | 51.22 (16.75, 156.63) | 28.07 (9.18, 85.82)   |      | -45% (-95, 563) | >0.80 |
| NEOx       | Media | DHA  | Diol       | Maresin 1   | 0  | 44.19 (15.63, 124.95) | 40.08 (14.18, 113.34) | 0.79 | -9% (-89, 668)  | >0.80 |
| NEOx       | Media | DHA  | Diol       | Maresin 1   | 15 | 60.13 (22.08, 163.76) | 57.32 (21.05, 156.1)  |      | -5% (-85, 526)  | >0.80 |
| NEOx       | Media | DHA  | Diol       | Maresin 1   | 30 | 61.97 (22.77, 168.64) | 62.08 (22.81, 168.93) |      | 0% (-84, 522)   | >0.80 |
| NEOx       | Media | DHA  | Diol       | Maresin 1   | 60 | 28.59 (9.81, 83.3)    | 31.62 (10.85, 92.15)  |      | 11% (-89, 1026) | >0.80 |
| Esterified | Cell  | AA   | Prostanoid | PGD2        | 0  | 3.5 (1.8, 6.8)        | 4.4 (2.2, 8.5)        | 0.55 | 24% (-68, 389)  | >0.80 |
| Esterified | Cell  | AA   | Prostanoid | PGD2        | 15 | 4 (2.5, 6.3)          | 4.4 (2.8, 6.9)        |      | 11% (-55, 175)  | >0.80 |
| Esterified | Cell  | AA   | Prostanoid | PGD2        | 30 | 4.4 (2.6, 7.3)        | 4.3 (2.6, 7.2)        |      | -1% (-55, 117)  | >0.80 |
| Esterified | Cell  | AA   | Prostanoid | PGD2        | 60 | 5.1 (2.4, 10.5)       | 4 (1.9, 8.3)          |      | -22% (-85, 308) | >0.80 |
| NEOx       | Cell  | AA   | Prostanoid | PGD2        | 0  | 3.24 (0.85, 12.39)    | 2.09 (0.55, 7.99)     | 0.11 | -36% (-95, 714) | >0.80 |
| NEOx       | Cell  | AA   | Prostanoid | PGD2        | 15 | 3.08 (0.79, 11.97)    | 2.41 (0.62, 9.39)     |      | -22% (-93, 813) | >0.80 |
| NEOx       | Cell  | AA   | Prostanoid | PGD2        | 30 | 2.72 (0.7, 10.51)     | 2.59 (0.67, 10.02)    |      | -5% (-92, 992)  | >0.80 |
| NEOx       | Cell  | AA   | Prostanoid | PGD2        | 60 | 1.71 (0.45, 6.51)     | 2.41 (0.63, 9.19)     |      | 41% (-90, 1799) | >0.80 |
| Esterified | Media | AA   | Prostanoid | PGD2        | 0  | 2.9 (1.26, 6.68)      | 3.64 (1.58, 8.39)     | 0.51 | 25% (-78, 616)  | >0.80 |
| Esterified | Media | AA   | Prostanoid | PGD2        | 15 | 3.21 (1.69, 6.1)      | 3.48 (1.83, 6.61)     |      | 8% (-70, 289)   | >0.80 |
| Esterified | Media | AA   | Prostanoid | PGD2        | 30 | 3.47 (1.75, 6.89)     | 3.26 (1.64, 6.46)     |      | -6% (-71, 199)  | >0.80 |
| Esterified | Media | AA   | Prostanoid | PGD2        | 60 | 3.86 (1.56, 9.56)     | 2.71 (1.09, 6.7)      |      | -30% (-91, 439) | >0.80 |
| NEOx       | Media | AA   | Prostanoid | PGD2        | 0  | 2.99 (1.39, 6.47)     | 2.08 (0.96, 4.5)      | 0.23 | -30% (-86, 249) | >0.80 |
| NEOx       | Media | AA   | Prostanoid | PGD2        | 15 | 2.51 (1.37, 4.6)      | 2.23 (1.22, 4.1)      |      | -11% (-73, 196) | >0.80 |
| NEOx       | Media | AA   | Prostanoid | PGD2        | 30 | 2.17 (1.14, 4.13)     | 2.48 (1.3, 4.7)       |      | 14% (-62, 242)  | >0.80 |
| NEOx       | Media | AA   | Prostanoid | PGD2        | 60 | 1.81 (0.78, 4.17)     | 3.37 (1.46, 7.78)     |      | 87% (-71, 1122) | >0.80 |
| Esterified | Cell  | EPA  | Prostanoid | PGD3        | 0  | 13.4 (5.1, 35.1)      | 24.2 (9.2, 63.4)      | 0.57 | 80% (-76, 1264) | >0.80 |
| Esterified | Cell  | EPA  | Prostanoid | PGD3        | 15 | 9.5 (4.1, 21.9)       | 15 (6.5, 34.8)        |      | 59% (-69, 708)  | >0.80 |
| Esterified | Cell  | EPA  | Prostanoid | PGD3        | 30 | 8.7 (3.7, 20.5)       | 12.2 (5.2, 28.7)      |      | 40% (-70, 550)  | >0.80 |
| Esterified | Cell  | EPA  | Prostanoid | PGD3        | 60 | 16.2 (5.8, 45.1)      | 17.6 (6.3, 48.9)      |      | 9% (-89, 972)   | >0.80 |
| NEOx       | Cell  | EPA  | Prostanoid | PGD3        | 0  | 21.96 (5.76, 83.64)   | 8.1 (2.13, 30.86)     | 0.23 | -63% (-98, 493) | >0.80 |
| NEOx       | Cell  | EPA  | Prostanoid | PGD3        | 15 | 15.16 (4.34, 52.96)   | 7.74 (2.21, 27.04)    |      | -49% (-95, 450) | >0.80 |
| NEOx       | Cell  | EPA  | Prostanoid | PGD3        | 30 | 11.61 (3.3, 40.83)    | 8.2 (2.33, 28.85)     |      | -29% (-93, 596) | >0.80 |
| NEOx       | Cell  | EPA  | Prostanoid | PGD3        | 60 | 9.31 (2.32, 37.42)    | 12.6 (3.13, 50.63)    |      | 35% (-94, 2787) | >0.80 |
| Esterified | Media | EPA  | Prostanoid | PGD3        | 0  | 6.39 (2.33, 17.55)    | 10.29 (3.75, 28.25)   | 0.41 | 61% (-81, 1234) | >0.80 |
| Esterified | Media | EPA  | Prostanoid | PGD3        | 15 | 9.99 (4.48, 22.28)    | 12.95 (5.8, 28.88)    |      | 30% (-73, 532)  | >0.80 |
| Esterified | Media | EPA  | Prostanoid | PGD3        | 30 | 13.95 (5.99, 32.51)   | 14.56 (6.25, 33.93)   |      | 4% (-76, 348)   | >0.80 |
| Esterified | Media | EPA  | Prostanoid | PGD3        | 60 | 19.46 (6.52, 58.07)   | 13.17 (4.42, 39.31)   |      | -32% (-94, 691) | >0.80 |
| NEOx       | Media | EPA  | Prostanoid | PGD3        | 0  | 15.42 (4.5, 52.86)    | 15.67 (4.57, 53.72)   | 0.63 | 2% (-92, 1234)  | >0.80 |
| NEOx       | Media | EPA  | Prostanoid | PGD3        | 15 | 15.14 (4.98, 46.03)   | 13.55 (4.46, 41.2)    |      | -10% (-89, 657) | >0.80 |
| NEOx       | Media | EPA  | Prostanoid | PGD3        | 30 | 13.13 (4.25, 40.55)   | 10.36 (3.35, 31.97)   |      | -21% (-90, 504) | >0.80 |
| NEOx       | Media | EPA  | Prostanoid | PGD3        | 60 | 6.83 (1.87, 24.96)    | 4.18 (1.14, 15.27)    |      | -39% (-97, 988) | >0.80 |
| Esterified | Cell  | dgLA | Prostanoid | PGE1        | 0  | 1.66 (0.59, 4.68)     | 1.46 (0.52, 4.11)     | 0.6  | -12% (-89, 672) | >0.80 |
| Esterified | Cell  | dgLA | Prostanoid | PGE1        | 15 | 1.26 (0.54, 2.96)     | 0.97 (0.41, 2.27)     |      | -23% (-86, 308) | >0.80 |
| Esterified | Cell  | dgLA | Prostanoid | PGE1        | 30 | 1.03 (0.42, 2.5)      | 0.69 (0.28, 1.68)     |      | -33% (-86, 216) | >0.80 |
| Esterified | Cell  | dgLA | Prostanoid | PGE1        | 60 | 0.85 (0.28, 2.6)      | 0.43 (0.14, 1.33)     |      | -49% (-96, 524) | >0.80 |
| NEOx       | Cell  | dgLA | Prostanoid | PGE1        | 0  | 0.87 (0.28, 2.67)     | 0.37 (0.12, 1.14)     | 0.25 | -57% (-96, 351) | >0.80 |
| NEOx       | Cell  | dgLA | Prostanoid | PGE1        | 15 | 0.97 (0.37, 2.54)     | 0.57 (0.22, 1.48)     |      | -42% (-91, 276) | >0.80 |
| NEOx       | Cell  | dgLA | Prostanoid | PGE1        | 30 | 0.99 (0.37, 2.66)     | 0.79 (0.29, 2.12)     |      | -20% (-86, 358) | >0.80 |
| NEOx       | Cell  | dgLA | Prostanoid | PGE1        | 60 | 0.76 (0.23, 2.53)     | 1.13 (0.34, 3.76)     |      | 49% (-90, 2089) | >0.80 |
| NEOx       | Media | dgLA | Prostanoid | PGE1        | 0  | 2.82 (1.01, 7.87)     | 1.54 (0.55, 4.28)     | 0.59 | -46% (-94, 364) | >0.80 |
| NEOx       | Media | dgLA | Prostanoid | PGE1        | 15 | 1.73 (0.78, 3.82)     | 1.08 (0.49, 2.4)      |      | -37% (-87, 203) | >0.80 |
| NEOx       | Media | dgLA | Prostanoid | PGE1        | 30 | 1.32 (0.57, 3.07)     | 0.96 (0.41, 2.22)     |      | -28% (-83, 204) | >0.80 |

|            |       |      |            |              |    |                        |                         |       |                  |       |
|------------|-------|------|------------|--------------|----|------------------------|-------------------------|-------|------------------|-------|
| NEOx       | Media | dgLA | Prostanoid | PGE1         | 60 | 1.5 (0.49, 4.56)       | 1.44 (0.47, 4.4)        |       | -4% (-92, 1083)  | >0.80 |
| Esterified | Cell  | AA   | Prostanoid | PGE2         | 0  | 14 (6, 32.4)           | 9.8 (4.2, 22.6)         | 0.5   | -30% (-88, 305)  | >0.80 |
| Esterified | Cell  | AA   | Prostanoid | PGE2         | 15 | 15.4 (8.1, 29.4)       | 9.2 (4.9, 17.6)         |       | -40% (-83, 116)  | >0.80 |
| Esterified | Cell  | AA   | Prostanoid | PGE2         | 30 | 16.9 (8.5, 33.7)       | 8.7 (4.4, 17.4)         |       | -48% (-84, 65)   | 0.52  |
| Esterified | Cell  | AA   | Prostanoid | PGE2         | 60 | 20.1 (8.1, 50.4)       | 7.7 (3.1, 19.2)         |       | -62% (-95, 200)  | 0.72  |
| NEOx       | Cell  | AA   | Prostanoid | PGE2         | 0  | 2.53 (0.62, 10.42)     | 5.48 (1.33, 22.53)      | 0.33  | 116% (-89, 4093) | >0.80 |
| NEOx       | Cell  | AA   | Prostanoid | PGE2         | 15 | 5.05 (1.59, 16.11)     | 7.74 (2.43, 24.66)      |       | 53% (-84, 1392)  | >0.80 |
| NEOx       | Cell  | AA   | Prostanoid | PGE2         | 30 | 8.74 (2.61, 29.28)     | 9.47 (2.83, 31.74)      |       | 8% (-87, 796)    | >0.80 |
| NEOx       | Cell  | AA   | Prostanoid | PGE2         | 60 | 17.07 (3.73, 78.12)    | 9.28 (2.03, 42.46)      |       | -46% (-98, 1557) | >0.80 |
| Esterified | Media | AA   | Prostanoid | PGE2         | 0  | 9.12 (2.47, 33.67)     | 4.02 (1.09, 14.83)      | >0.80 | -56% (-97, 582)  | >0.80 |
| Esterified | Media | AA   | Prostanoid | PGE2         | 15 | 9.38 (3.14, 28.03)     | 4.18 (1.4, 12.48)       |       | -55% (-95, 278)  | >0.80 |
| Esterified | Media | AA   | Prostanoid | PGE2         | 30 | 9.47 (3.05, 29.4)      | 4.26 (1.37, 13.23)      |       | -55% (-94, 232)  | >0.80 |
| Esterified | Media | AA   | Prostanoid | PGE2         | 60 | 9.1 (2.25, 36.86)      | 4.18 (1.03, 16.94)      |       | -54% (-98, 960)  | >0.80 |
| NEOx       | Media | AA   | Prostanoid | PGE2         | 0  | 14.14 (3.78, 52.91)    | 13.84 (3.7, 51.77)      | 0.62  | -2% (-94, 1455)  | >0.80 |
| NEOx       | Media | AA   | Prostanoid | PGE2         | 15 | 9.1 (2.87, 28.8)       | 10.35 (3.27, 32.77)     |       | 14% (-88, 960)   | >0.80 |
| NEOx       | Media | AA   | Prostanoid | PGE2         | 30 | 6.81 (2.09, 22.12)     | 9 (2.77, 29.26)         |       | 32% (-84, 990)   | >0.80 |
| NEOx       | Media | AA   | Prostanoid | PGE2         | 60 | 5.99 (1.48, 24.3)      | 10.71 (2.64, 43.44)     |       | 79% (-92, 3982)  | >0.80 |
| Esterified | Cell  | EPA  | Prostanoid | PGE3         | 0  | 28.7 (11.1, 74.1)      | 25.8 (10, 66.5)         | >0.80 | -10% (-88, 548)  | >0.80 |
| Esterified | Cell  | EPA  | Prostanoid | PGE3         | 15 | 20.7 (10.2, 41.9)      | 17.9 (8.8, 36.2)        |       | -14% (-79, 253)  | >0.80 |
| Esterified | Cell  | EPA  | Prostanoid | PGE3         | 30 | 17 (7.9, 36.5)         | 14.1 (6.6, 30.3)        |       | -17% (-76, 194)  | >0.80 |
| Esterified | Cell  | EPA  | Prostanoid | PGE3         | 60 | 17.1 (6.1, 48.2)       | 13.2 (4.7, 37.2)        |       | -23% (-93, 694)  | >0.80 |
| NEOx       | Cell  | EPA  | Prostanoid | PGE3         | 0  | 17.07 (3.97, 73.47)    | 14.91 (3.46, 64.2)      | >0.80 | -13% (-96, 1737) | >0.80 |
| NEOx       | Cell  | EPA  | Prostanoid | PGE3         | 15 | 7.48 (1.97, 28.41)     | 6.96 (1.83, 26.43)      |       | -7% (-93, 1095)  | >0.80 |
| NEOx       | Cell  | EPA  | Prostanoid | PGE3         | 30 | 5.57 (1.45, 21.47)     | 5.52 (1.43, 21.26)      |       | -1% (-91, 1040)  | >0.80 |
| NEOx       | Cell  | EPA  | Prostanoid | PGE3         | 60 | 15.23 (3.3, 70.27)     | 17.09 (3.7, 78.86)      |       | 12% (-96, 3223)  | >0.80 |
| Esterified | Media | EPA  | Prostanoid | PGE3         | 0  | 9.91 (3.41, 28.79)     | 13 (4.48, 37.76)        | 0.66  | 31% (-86, 1098)  | >0.80 |
| Esterified | Media | EPA  | Prostanoid | PGE3         | 15 | 11.65 (5.41, 25.09)    | 13.4 (6.22, 28.87)      |       | 15% (-75, 434)   | >0.80 |
| Esterified | Media | EPA  | Prostanoid | PGE3         | 30 | 12.53 (5.41, 29.02)    | 12.64 (5.46, 29.28)     |       | 1% (-74, 293)    | >0.80 |
| Esterified | Media | EPA  | Prostanoid | PGE3         | 60 | 11.09 (3.44, 35.77)    | 8.6 (2.67, 27.76)       |       | -22% (-94, 977)  | >0.80 |
| NEOx       | Media | EPA  | Prostanoid | PGE3         | 0  | 21.15 (7.85, 57)       | 7.69 (2.85, 20.74)      | 0.79  | -64% (-95, 184)  | 0.68  |
| NEOx       | Media | EPA  | Prostanoid | PGE3         | 15 | 18.5 (9.12, 37.53)     | 7.24 (3.57, 14.69)      |       | -61% (-91, 61)   | 0.35  |
| NEOx       | Media | EPA  | Prostanoid | PGE3         | 30 | 15.81 (7.27, 34.39)    | 6.65 (3.06, 14.47)      |       | -58% (-88, 47)   | 0.30  |
| NEOx       | Media | EPA  | Prostanoid | PGE3         | 60 | 10.76 (3.61, 32.02)    | 5.24 (1.76, 15.59)      |       | -51% (-96, 463)  | >0.80 |
| Esterified | Cell  | AA   | Prostanoid | PGF2a        | 0  | 6.3 (1.8, 22.3)        | 9.5 (2.7, 33.6)         | 0.18  | 51% (-89, 2009)  | >0.80 |
| Esterified | Cell  | AA   | Prostanoid | PGF2a        | 15 | 4.6 (1.5, 14.7)        | 4.8 (1.5, 15.4)         |       | 4% (-89, 853)    | >0.80 |
| Esterified | Cell  | AA   | Prostanoid | PGF2a        | 30 | 4.9 (1.5, 15.7)        | 3.5 (1.1, 11.3)         |       | -28% (-91, 499)  | >0.80 |
| Esterified | Cell  | AA   | Prostanoid | PGF2a        | 60 | 15.8 (4.2, 59.5)       | 5.5 (1.5, 20.6)         |       | -65% (-98, 551)  | >0.80 |
| NEOx       | Cell  | AA   | Prostanoid | PGF2a        | 0  | 10.34 (2.5, 42.76)     | 5.58 (1.35, 23.08)      | 0.78  | -46% (-97, 893)  | >0.80 |
| NEOx       | Cell  | AA   | Prostanoid | PGF2a        | 15 | 10.65 (2.69, 42.12)    | 6.16 (1.56, 24.36)      |       | -42% (-96, 661)  | >0.80 |
| NEOx       | Cell  | AA   | Prostanoid | PGF2a        | 30 | 9.85 (2.5, 38.85)      | 6.1 (1.55, 24.07)       |       | -38% (-95, 658)  | >0.80 |
| NEOx       | Cell  | AA   | Prostanoid | PGF2a        | 60 | 6.07 (1.41, 26.08)     | 4.31 (1, 18.54)         |       | -29% (-97, 1566) | >0.80 |
| Esterified | Media | AA   | Prostanoid | PGF2a        | 0  | 16.66 (5.24, 52.93)    | 7.3 (2.3, 23.19)        | 0.61  | -56% (-96, 395)  | >0.80 |
| Esterified | Media | AA   | Prostanoid | PGF2a        | 15 | 12.33 (4.59, 33.16)    | 6.22 (2.31, 16.72)      |       | -50% (-93, 246)  | >0.80 |
| Esterified | Media | AA   | Prostanoid | PGF2a        | 30 | 10.32 (3.73, 28.54)    | 5.99 (2.16, 16.56)      |       | -42% (-90, 254)  | >0.80 |
| Esterified | Media | AA   | Prostanoid | PGF2a        | 60 | 10.4 (3.03, 35.68)     | 7.99 (2.33, 27.41)      |       | -23% (-95, 1115) | >0.80 |
| NEOx       | Media | AA   | Prostanoid | PGF2a        | 0  | 5.1 (1.49, 17.45)      | 8.47 (2.48, 28.99)      | 0.52  | 66% (-87, 2054)  | >0.80 |
| NEOx       | Media | AA   | Prostanoid | PGF2a        | 15 | 5.39 (1.73, 16.78)     | 7.61 (2.45, 23.66)      |       | 41% (-84, 1128)  | >0.80 |
| NEOx       | Media | AA   | Prostanoid | PGF2a        | 30 | 6.3 (2.01, 19.79)      | 7.54 (2.4, 23.67)       |       | 20% (-85, 854)   | >0.80 |
| NEOx       | Media | AA   | Prostanoid | PGF2a        | 60 | 11.58 (3.2, 41.88)     | 9.98 (2.76, 36.1)       |       | -14% (-95, 1377) | >0.80 |
| Esterified | Cell  | EPA  | Prostanoid | PGF3a        | 0  | 217 (68, 691)          | 158 (50, 502)           | 0.52  | -27% (-93, 676)  | >0.80 |
| Esterified | Cell  | EPA  | Prostanoid | PGF3a        | 15 | 212 (100, 449)         | 124 (58, 262)           |       | -42% (-87, 164)  | >0.80 |
| Esterified | Cell  | EPA  | Prostanoid | PGF3a        | 30 | 214 (90, 506)          | 100 (42, 237)           |       | -53% (-87, 67)   | 0.47  |
| Esterified | Cell  | EPA  | Prostanoid | PGF3a        | 60 | 240 (66, 868)          | 72 (20, 262)            |       | -70% (-98, 437)  | >0.80 |
| NEOx       | Cell  | EPA  | Prostanoid | PGF3a        | 0  | 210 (59.09, 746.31)    | 89.4 (25.15, 317.71)    | 0.33  | -57% (-97, 495)  | >0.80 |
| NEOx       | Cell  | EPA  | Prostanoid | PGF3a        | 15 | 186.15 (57.24, 605.39) | 101.9 (31.33, 331.41)   |       | -45% (-94, 416)  | >0.80 |
| NEOx       | Cell  | EPA  | Prostanoid | PGF3a        | 30 | 153.83 (46.94, 504.13) | 108.29 (33.04, 354.88)  |       | -30% (-92, 508)  | >0.80 |
| NEOx       | Cell  | EPA  | Prostanoid | PGF3a        | 60 | 85.11 (22.7, 319.1)    | 99.07 (26.42, 371.45)   |       | 16% (-94, 2045)  | >0.80 |
| Esterified | Media | EPA  | Prostanoid | PGF3a        | 0  | 273.07 (82.52, 903.6)  | 223.08 (67.42, 738.16)  | 0.69  | -18% (-93, 860)  | >0.80 |
| Esterified | Media | EPA  | Prostanoid | PGF3a        | 15 | 184.74 (82.01, 416.18) | 173.29 (76.92, 390.37)  |       | -6% (-82, 380)   | >0.80 |
| Esterified | Media | EPA  | Prostanoid | PGF3a        | 30 | 154.63 (62.12, 384.93) | 166.54 (66.9, 414.58)   |       | 8% (-74, 340)    | >0.80 |
| Esterified | Media | EPA  | Prostanoid | PGF3a        | 60 | 205.15 (54.56, 771.41) | 291.31 (77.47, 1095.38) |       | 42% (-93, 2658)  | >0.80 |
| NEOx       | Media | EPA  | Prostanoid | PGF3a        | 0  | 298.54 (97.23, 916.67) | 154.68 (50.38, 474.94)  | >0.80 | -48% (-95, 440)  | >0.80 |
| NEOx       | Media | EPA  | Prostanoid | PGF3a        | 15 | 188.55 (68.2, 521.3)   | 96.96 (35.07, 268.07)   |       | -49% (-93, 262)  | >0.80 |
| NEOx       | Media | EPA  | Prostanoid | PGF3a        | 30 | 141.58 (50.56, 396.5)  | 72.26 (25.8, 202.36)    |       | -49% (-92, 228)  | >0.80 |
| NEOx       | Media | EPA  | Prostanoid | PGF3a        | 60 | 134.16 (41.29, 435.87) | 67.44 (20.76, 219.12)   |       | -50% (-96, 588)  | >0.80 |
| Esterified | Cell  | DHA  | Diol       | Protectin D1 | 0  | 1.43 (0.45, 4.57)      | 2.36 (0.74, 7.55)       | 0.38  | 65% (-85, 1665)  | >0.80 |
| Esterified | Cell  | DHA  | Diol       | Protectin D1 | 15 | 1.44 (0.46, 4.51)      | 2 (0.64, 6.28)          |       | 39% (-83, 1069)  | >0.80 |
| Esterified | Cell  | DHA  | Diol       | Protectin D1 | 30 | 1.62 (0.52, 5.04)      | 1.89 (0.61, 5.91)       |       | 17% (-85, 836)   | >0.80 |
| Esterified | Cell  | DHA  | Diol       | Protectin D1 | 60 | 2.8 (0.85, 9.2)        | 2.33 (0.71, 7.66)       |       | -17% (-93, 960)  | >0.80 |
| NEOx       | Cell  | DHA  | Diol       | Protectin D1 | 0  | 2.02 (0.93, 4.39)      | 0.9 (0.42, 1.97)        | 0.7   | -55% (-91, 128)  | 0.67  |
| NEOx       | Cell  | DHA  | Diol       | Protectin D1 | 15 | 2.1 (1.15, 3.85)       | 1.02 (0.55, 1.86)       |       | -52% (-85, 61)   | 0.45  |
| NEOx       | Cell  | DHA  | Diol       | Protectin D1 | 30 | 1.97 (1.03, 3.74)      | 1.03 (0.54, 1.95)       |       | -48% (-83, 56)   | 0.47  |
| NEOx       | Cell  | DHA  | Diol       | Protectin D1 | 60 | 1.25 (0.54, 2.91)      | 0.76 (0.33, 1.78)       |       | -39% (-91, 307)  | >0.80 |
| Esterified | Media | DHA  | Diol       | Protectin D1 | 0  | 2.51 (1.15, 5.48)      | 1.38 (0.63, 3.01)       | 0.35  | -45% (-88, 160)  | >0.80 |
| Esterified | Media | DHA  | Diol       | Protectin D1 | 15 | 1.79 (1.16, 2.77)      | 1.24 (0.8, 1.91)        |       | -31% (-71, 62)   | 0.78  |
| Esterified | Media | DHA  | Diol       | Protectin D1 | 30 | 1.47 (0.86, 2.52)      | 1.27 (0.74, 2.18)       |       | -14% (-54, 61)   | >0.80 |
| Esterified | Media | DHA  | Diol       | Protectin D1 | 60 | 1.51 (0.63, 3.63)      | 2.05 (0.85, 4.93)       |       | 36% (-80, 842)   | >0.80 |
| NEOx       | Media | DHA  | Diol       | Protectin D1 | 0  | 2.12 (0.87, 5.14)      | 1.26 (0.52, 3.07)       | >0.80 | -40% (-91, 280)  | >0.80 |
| NEOx       | Media | DHA  | Diol       | Protectin D1 | 15 | 1.83 (0.82, 4.08)      | 1.09 (0.49, 2.43)       |       | -40% (-87, 178)  | >0.80 |
| NEOx       | Media | DHA  | Diol       | Protectin D1 | 30 | 1.79 (0.79, 4.03)      | 1.07 (0.47, 2.4)        |       | -40% (-86, 159)  | >0.80 |
| NEOx       | Media | DHA  | Diol       | Protectin D1 | 60 | 2.48 (0.98, 6.29)      | 1.48 (0.58, 3.75)       |       | -40% (-92, 370)  | >0.80 |
| Esterified | Cell  | dgLA | Prostanoid | TXB1         | 0  | 37 (15, 90)            | 19 (8, 46)              | 0.09  | -48% (-92, 228)  | >0.80 |
| Esterified | Cell  | dgLA | Prostanoid | TXB1         | 15 | 48 (25, 93)            | 39 (20, 74)             |       | -20% (-78, 194)  | >0.80 |
| Esterified | Cell  | dgLA | Prostanoid | TXB1         | 30 | 47 (23, 95)            | 58 (29, 118)            |       | 24% (-61, 296)   | >0.80 |
| Esterified | Cell  | dgLA | Prostanoid | TXB1         | 60 | 18 (7, 48)             | 53 (20, 141)            |       | 196% (-67, 2538) | 0.67  |

|            |       |      |            |      |    |                      |                      |       |                 |       |
|------------|-------|------|------------|------|----|----------------------|----------------------|-------|-----------------|-------|
| NEOx       | Cell  | dgLA | Prostanoid | TXB1 | 0  | 17.95 (7.99, 40.33)  | 6.16 (2.74, 13.84)   | 0.26  | -66% (-94, 87)  | 0.40  |
| NEOx       | Cell  | dgLA | Prostanoid | TXB1 | 15 | 14.65 (7.27, 29.54)  | 6.22 (3.08, 12.54)   |       | -58% (-89, 66)  | 0.40  |
| NEOx       | Cell  | dgLA | Prostanoid | TXB1 | 30 | 10.31 (5.03, 21.17)  | 5.42 (2.64, 11.12)   |       | -47% (-85, 90)  | 0.66  |
| NEOx       | Cell  | dgLA | Prostanoid | TXB1 | 60 | 3.28 (1.39, 7.75)    | 2.64 (1.12, 6.24)    |       | -20% (-88, 451) | >0.80 |
| Esterified | Media | dgLA | Prostanoid | TXB1 | 0  | 36.82 (17.49, 77.51) | 27.25 (12.94, 57.37) | 0.23  | -26% (-84, 249) | >0.80 |
| Esterified | Media | dgLA | Prostanoid | TXB1 | 15 | 39.49 (22.73, 68.61) | 37.35 (21.5, 64.89)  |       | -5% (-69, 185)  | >0.80 |
| Esterified | Media | dgLA | Prostanoid | TXB1 | 30 | 34.93 (19.22, 63.48) | 42.21 (23.23, 76.71) |       | 21% (-55, 225)  | >0.80 |
| Esterified | Media | dgLA | Prostanoid | TXB1 | 60 | 15.33 (6.79, 34.62)  | 30.25 (13.4, 68.3)   |       | 97% (-68, 1131) | >0.80 |
| NEOx       | Media | dgLA | Prostanoid | TXB1 | 0  | 11.33 (6.71, 19.13)  | 10.5 (6.22, 17.73)   | 0.48  | -7% (-68, 172)  | >0.80 |
| NEOx       | Media | dgLA | Prostanoid | TXB1 | 15 | 10.74 (7.54, 15.28)  | 11.08 (7.78, 15.76)  |       | 3% (-49, 110)   | >0.80 |
| NEOx       | Media | dgLA | Prostanoid | TXB1 | 30 | 10.12 (6.8, 15.06)   | 11.62 (7.81, 17.3)   |       | 15% (-38, 111)  | >0.80 |
| NEOx       | Media | dgLA | Prostanoid | TXB1 | 60 | 8.86 (4.96, 15.83)   | 12.61 (7.06, 22.52)  |       | 42% (-61, 422)  | >0.80 |
| Esterified | Cell  | AA   | Prostanoid | TXB2 | 0  | 5.2 (2.6, 10.6)      | 3.7 (1.8, 7.5)       | 0.68  | -30% (-84, 208) | >0.80 |
| Esterified | Cell  | AA   | Prostanoid | TXB2 | 15 | 4.4 (2.5, 7.9)       | 3.4 (1.9, 6)         |       | -25% (-76, 135) | >0.80 |
| Esterified | Cell  | AA   | Prostanoid | TXB2 | 30 | 4.1 (2.3, 7.6)       | 3.4 (1.8, 6.1)       |       | -19% (-72, 133) | >0.80 |
| Esterified | Cell  | AA   | Prostanoid | TXB2 | 60 | 4.7 (2.2, 10.1)      | 4.4 (2.1, 9.5)       |       | -6% (-83, 416)  | >0.80 |
| NEOx       | Cell  | AA   | Prostanoid | TXB2 | 0  | 4.20 (1.9, 9.29)     | 1.96 (0.89, 4.33)    | 0.06  | -53% (-91, 146) | 0.74  |
| NEOx       | Cell  | AA   | Prostanoid | TXB2 | 15 | 3.75 (1.88, 7.48)    | 2.51 (1.26, 5.01)    |       | -33% (-82, 155) | >0.80 |
| NEOx       | Cell  | AA   | Prostanoid | TXB2 | 30 | 3.08 (1.52, 6.25)    | 2.96 (1.46, 6.01)    |       | -4% (-73, 240)  | >0.80 |
| NEOx       | Cell  | AA   | Prostanoid | TXB2 | 60 | 1.62 (0.70, 3.77)    | 3.22 (1.39, 7.49)    |       | 98% (-70, 1206) | >0.80 |
| Esterified | Media | AA   | Prostanoid | TXB2 | 0  | 3.86 (1.84, 8.13)    | 3.7 (1.76, 7.79)     | 0.64  | -4% (-79, 341)  | >0.80 |
| Esterified | Media | AA   | Prostanoid | TXB2 | 15 | 4.05 (2.49, 6.60)    | 3.51 (2.16, 5.72)    |       | -13% (-67, 131) | >0.80 |
| Esterified | Media | AA   | Prostanoid | TXB2 | 30 | 4.04 (2.32, 7.05)    | 3.17 (1.82, 5.53)    |       | -22% (-66, 80)  | >0.80 |
| Esterified | Media | AA   | Prostanoid | TXB2 | 60 | 3.47 (1.52, 7.94)    | 2.23 (0.97, 5.09)    |       | -36% (-90, 307) | >0.80 |
| NEOx       | Media | AA   | Prostanoid | TXB2 | 0  | 5.93 (3.19, 11.01)   | 2.6 (1.4, 4.82)      | 0.11  | -56% (-88, 56)  | 0.37  |
| NEOx       | Media | AA   | Prostanoid | TXB2 | 15 | 3.87 (2.58, 5.81)    | 2.29 (1.53, 3.44)    |       | -41% (-74, 34)  | 0.38  |
| NEOx       | Media | AA   | Prostanoid | TXB2 | 30 | 2.72 (1.71, 4.33)    | 2.18 (1.37, 3.47)    |       | -20% (-60, 60)  | >0.80 |
| NEOx       | Media | AA   | Prostanoid | TXB2 | 60 | 1.7 (0.85, 3.37)     | 2.49 (1.25, 4.95)    |       | 47% (-68, 583)  | >0.80 |
| Esterified | Cell  | EPA  | Prostanoid | TXB3 | 0  | 6.9 (2.8, 17.3)      | 8.5 (3.4, 21.3)      | >0.80 | 23% (-80, 654)  | >0.80 |
| Esterified | Cell  | EPA  | Prostanoid | TXB3 | 15 | 7.1 (4.4, 11.5)      | 8.2 (5.1, 13.3)      |       | 16% (-55, 194)  | >0.80 |
| Esterified | Cell  | EPA  | Prostanoid | TXB3 | 30 | 7.0 (3.8, 13.1)      | 7.6 (4.1, 14.2)      |       | 9% (-42, 102)   | >0.80 |
| Esterified | Cell  | EPA  | Prostanoid | TXB3 | 60 | 6.0 (2.1, 17.0)      | 5.8 (2.0, 16.3)      |       | -4% (-90, 845)  | >0.80 |
| NEOx       | Cell  | EPA  | Prostanoid | TXB3 | 0  | 8.36 (3.54, 19.75)   | 3.33 (1.41, 7.87)    | 0.56  | -60% (-93, 122) | 0.59  |
| NEOx       | Cell  | EPA  | Prostanoid | TXB3 | 15 | 8.24 (5.08, 13.39)   | 3.83 (2.36, 6.23)    |       | -53% (-82, 21)  | 0.17  |
| NEOx       | Cell  | EPA  | Prostanoid | TXB3 | 30 | 8.31 (4.57, 15.11)   | 4.51 (2.48, 8.20)    |       | -46% (-73, 11)  | 0.12  |
| NEOx       | Cell  | EPA  | Prostanoid | TXB3 | 60 | 9.03 (3.43, 23.79)   | 6.68 (2.54, 17.58)   |       | -26% (-91, 528) | >0.80 |
| Esterified | Media | EPA  | Prostanoid | TXB3 | 0  | 7.5 (3.31, 17.02)    | 6.45 (2.84, 14.64)   | >0.80 | -14% (-85, 379) | >0.80 |
| Esterified | Media | EPA  | Prostanoid | TXB3 | 15 | 6.78 (3.29, 13.95)   | 5.6 (2.72, 11.53)    |       | -17% (-80, 233) | >0.80 |
| Esterified | Media | EPA  | Prostanoid | TXB3 | 30 | 6.5 (3.11, 13.57)    | 5.16 (2.47, 10.77)   |       | -21% (-79, 197) | >0.80 |
| Esterified | Media | EPA  | Prostanoid | TXB3 | 60 | 7.14 (3, 17)         | 5.23 (2.2, 12.45)    |       | -27% (-89, 407) | >0.80 |
| NEOx       | Media | EPA  | Prostanoid | TXB3 | 0  | 11.31 (5.58, 22.92)  | 9.46 (4.67, 19.18)   | >0.80 | -16% (-81, 264) | >0.80 |
| NEOx       | Media | EPA  | Prostanoid | TXB3 | 15 | 9.25 (4.79, 17.85)   | 7.52 (3.9, 14.52)    |       | -19% (-77, 184) | >0.80 |
| NEOx       | Media | EPA  | Prostanoid | TXB3 | 30 | 7.93 (4.09, 15.37)   | 6.27 (3.24, 12.16)   |       | -21% (-76, 163) | >0.80 |
| NEOx       | Media | EPA  | Prostanoid | TXB3 | 60 | 6.73 (3.22, 14.06)   | 5.03 (2.41, 10.5)    |       | -25% (-85, 279) | >0.80 |

**Supplemental Table 16: Eigenvalues for each component**

| PC           | Eigenvalue  | %    |
|--------------|-------------|------|
| 1            | 16.0        | 28.6 |
| 2            | 11.0        | 19.7 |
| 3            | 7.7         | 13.7 |
| 4            | 2.4         | 4.2  |
| 5            | 1.9         | 3.4  |
| 6            | 1.7         | 3.1  |
| 7            | 1.6         | 2.8  |
| 8            | 1.5         | 2.7  |
| 9            | 1.3         | 2.4  |
| 10           | 1.2         | 2.2  |
| 11           | 1.2         | 2.1  |
| 12           | 1.1         | 1.9  |
| 13+          | 7.4         | 13.2 |
| <b>Total</b> | <b>56.0</b> |      |

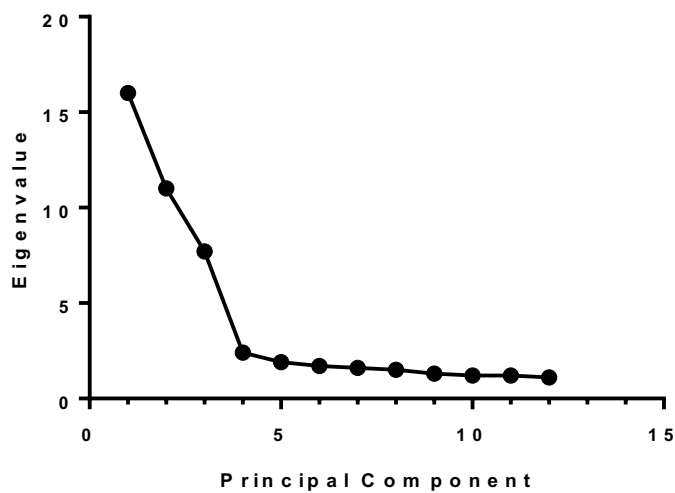

**Supplemental Table 17. Principal Components: Loading matrix**

|                     | Prin1  | Prin2  | Prin3  | Sum sq<br>(PC 1-3) |
|---------------------|--------|--------|--------|--------------------|
| <b>18-HEPE</b>      | 0.626  | 0.252  | -0.702 | <b>0.95</b>        |
| <b>15-HETE</b>      | -0.525 | 0.773  | -0.127 | <b>0.89</b>        |
| <b>12-HETE</b>      | -0.136 | 0.916  | 0.154  | <b>0.88</b>        |
| <b>14(15)-EpETE</b> | 0.794  | 0.451  | -0.194 | <b>0.87</b>        |
| <b>8(9)-EpETrE</b>  | 0.815  | -0.170 | -0.413 | <b>0.86</b>        |
| 12(13)-EpOME        | 0.844  | 0.304  | -0.195 | 0.84               |
| 15-HEPE             | -0.587 | -0.305 | -0.635 | 0.84               |
| 9-HODE              | 0.766  | 0.496  | 0.069  | 0.84               |
| 13-HODE             | 0.887  | 0.175  | 0.135  | 0.83               |
| 17(18)-EpETE        | 0.608  | 0.587  | -0.344 | 0.83               |
| 9-KODE              | 0.135  | 0.886  | 0.157  | 0.83               |
| 5-KETE              | 0.301  | 0.642  | -0.563 | 0.82               |
| 8(9)-DiHETrE        | 0.788  | -0.079 | 0.435  | 0.82               |
| 12(13)-DiHOME       | -0.597 | 0.563  | -0.369 | 0.81               |
| 9-HEPE              | 0.673  | -0.349 | -0.473 | 0.80               |
| 16(17)-EpDPE        | 0.834  | -0.217 | 0.228  | 0.79               |
| 9(10)-EpOME         | 0.872  | -0.142 | -0.021 | 0.78               |
| 5-HETE              | -0.575 | 0.635  | -0.165 | 0.76               |
| 9-HOTrE             | 0.591  | -0.636 | -0.034 | 0.75               |
| 15-KETE             | 0.775  | -0.293 | 0.238  | 0.74               |
| 14(15)-EpETrE       | 0.342  | 0.327  | 0.717  | 0.74               |

|                |               |               |              |             |
|----------------|---------------|---------------|--------------|-------------|
| 20-HDoHE       | 0.622         | -0.075        | 0.585        | 0.73        |
| 17(18)-DiHETE  | 0.378         | 0.709         | -0.278       | 0.72        |
| 12-KETE        | 0.663         | 0.248         | -0.464       | 0.72        |
| 11(12)-EpETE   | 0.717         | 0.441         | 0.052        | 0.71        |
| 8(9)-DiHETE    | -0.652        | 0.499         | -0.156       | 0.70        |
| 8-HDoHE        | 0.130         | 0.407         | 0.671        | 0.63        |
| 11(12)-DiHETrE | 0.629         | -0.157        | -0.451       | 0.62        |
| 15-HpETE       | 0.269         | -0.704        | -0.232       | 0.62        |
| 9(10)-DiHOME   | 0.188         | 0.702         | -0.300       | 0.62        |
| 19(20)-EpDPE   | -0.021        | 0.221         | 0.750        | 0.61        |
| 14(15)-DiHETE  | 0.364         | 0.398         | -0.560       | 0.60        |
| <b>9-HETE</b>  | <b>-0.520</b> | <b>-0.345</b> | <b>0.451</b> | <b>0.59</b> |
| 13(14)-EpDPE   | 0.685         | -0.122        | 0.328        | 0.59        |
| 14-HDoHE       | 0.156         | 0.664         | 0.355        | 0.59        |
| 8-HEPE         | 0.710         | -0.273        | 0.065        | 0.58        |
| 11-HEPE        | 0.100         | -0.726        | -0.192       | 0.57        |
| 8(9)-EpETE     | 0.301         | 0.540         | 0.365        | 0.52        |
| 5-HEPE         | 0.108         | -0.706        | 0.079        | 0.52        |
| 12-HpETE       | 0.409         | -0.040        | 0.585        | 0.51        |
| 7-HDoHE        | 0.686         | 0.180         | -0.080       | 0.51        |
| 13-HOTrE       | 0.666         | -0.094        | -0.202       | 0.49        |
| 4-HDoHE        | -0.039        | -0.188        | 0.655        | 0.47        |
| 13-KODE        | -0.395        | 0.301         | 0.434        | 0.44        |
| 17-HDoHE       | -0.069        | 0.459         | 0.463        | 0.43        |
| 11(12)-EpETrE  | 0.313         | -0.539        | -0.155       | 0.41        |
| 7(8)-EpDPE     | 0.604         | 0.098         | -0.052       | 0.38        |
| 14(15)-DiHETrE | -0.556        | 0.119         | -0.215       | 0.37        |
| 22-HDoHE       | 0.209         | -0.457        | 0.336        | 0.37        |
| 10(11)-EpDPE   | 0.561         | -0.168        | 0.077        | 0.35        |
| 10-HDoHE       | 0.383         | 0.439         | 0.007        | 0.34        |
| 12-HEPE        | 0.497         | 0.241         | 0.184        | 0.34        |
| 11(12)-DiHETE  | 0.204         | 0.030         | 0.539        | 0.33        |
| 13-HDoHE       | 0.043         | 0.418         | 0.309        | 0.27        |
| 11-HDoHE       | 0.251         | 0.149         | 0.049        | 0.09        |
| 16-HDoHE       | 0.116         | -0.105        | -0.069       | 0.03        |
